# Supplementary material for: A Workflow towards the Reproducible Identification and Quantitation of Protein Carbonylation Sites in Human Plasma
Source: Antioxidants (Basel). 2021 Mar 1;10(3):369. doi: 10.3390/antiox10030369 (PMC7999155; doi:10.3390/antiox10030369)
Supplement: Supplementary file 2 [file antioxidants-10-00369-s002.xlsx]

## Sheet: Descriptions
Supplementary Tables S1-S4
A workflow towards the reproducible identification and quantitation of protein carbonylation sites in human plasma Juan Camilo Rojas Echeverri1,2, Sanja Milkovska-Stamenova1,2 and Ralf Hoffmann1,2* 1 Institute of Bioanalytical Chemistry, Faculty of Chemistry and Mineralogy, Universität Leipzig, Leipzig 2 Center for Biotechnology and Biomedicine, Universität Leipzig, Leipzig, Germany * Corresponde…
Table S1	Mass shifts and structures of all derivatized carbonyl modifications considered in this study
Table S2	FDR Thresholds
Table S3	List of confirmed ARP-peptides
Table S4	Universal Spectrum Identifiers (USI)

## Sheet: Table S1
Mod. #	AA	ARP Mod Mass Shift	Carbonyl Mod Mass Shift	ARP Derivatized structure#	Modification Type	Modification Abbreviation
1	R	+270.0674 (+C11H14N2O4S)	-43.0535 (-CH5N3 +O)		Oxidation Truncation	ARP arg ox
2	M	+281.1125 (+C11H15N5O4)	-32.0084 (-CH4S +O)		Oxidation Truncation	ARP met ox
3	E	+283.1103 (+C11H17N5O2S)	-30.0106 (-CH2O)		Oxidation Truncation	ARP glu ox
4	D	+283.1103 (+C11H17N5O2S)	-30.0106 (-CH2O)		Oxidation Truncation	ARP asp ox
5	K	+298.0736 (+C11H14N4O4S)	-15.0473 (-CH5N1 +O)		Oxidation Truncation	ARP lys ox minCH2
6	T	+311.1053 (+C12H17N5O3S)	-2.0156 (-H2)		Oxidation	ARP thr ox
7	S	+311.1053 (+C12H17N5O3S)	-2.0156 (-H2)		Oxidation	ARP ser ox
8	K	+312.0892 (+C12H16N4O4S)	-1.0317 (-H3N +O)		Oxidation Truncation	ARP lys ox
9	AL	+312.0892 (+C12H16N4O4S)	-1.0317 (-H3N +O)		Peroxyl radical induced backbone cleavage (N-terminus)	ARP bb cleavage (N-term)
10	L	+313.0845 (+C11H15N5O4S)	-0.0364 (-CH4 +O)		Oxidation Truncation	ARP leu plus 14 ox min CH2
11	DE	+313.1209 (+C12H19N5O3S)	-18.0106 (-H2O)		Isoimide metastable intermediate	ARP isoimide
12	NQ	+314.1049 (+C12H18N4O4S)	-17.0265 (-H3N)		Imide metastable intermediate	ARP imide
13	K	+327.1002 (+C12H17N5O4S)	+13.9793 (-H2 +O)		Oxidation Addition	ARP plus14 ox
14	L	+327.1002 (+C12H17N5O4S)	+13.9793 (-H2 +O)		Oxidation Addition	ARP plus14 ox
15	V	+327.1002 (+C12H17N5O4S)	+13.9793 (-H2 +O)		Oxidation Addition	ARP plus14 ox
16	A	+327.1002 (+C12H17N5O4S)	+13.9793 (-H2 +O)		Oxidation Addition	ARP plus14 ox
17	I	+327.1002 (+C12H17N5O4S)	+13.9793 (-H2 +O)		Oxidation Addition	ARP plus14 ox
18	Q	+327.1002 (+C12H17N5O4S)	+13.9793 (-H2 +O)		Oxidation Addition	ARP plus14 ox
19	E	+327.1002 (+C12H17N5O4S)	+13.9793 (-H2 +O)		Oxidation Addition	ARP plus14 ox
20	N	+327.1002 (+C12H17N5O4S)	+13.9793 (-H2 +O)		Oxidation Addition	ARP plus14 ox
21	D	+327.1002 (+C12H17N5O4S)	+13.9793 (-H2 +O)		Oxidation Addition	ARP plus14 ox
22	P	+329.1158 (+C12H19N5O4S)	+15.9949 (+O)		Oxidation Truncation	ARP pro ox
23	KR	+353.1158§ (+C14H19N5O4S)	+39.9949 (+C2O)		Glyoxal Schiff base	ARP go sb
24	R	+353.1158§ (+C14H19N5O4S)	+39.9949 (+C2O)		Glarg	ARP Glarg
25	K	+355.1314 (+C14H21N5O4S)	+42.0105 (+C2H2O)		Aldoamine (glycolaldehyde-derived Amadori product)	ARP aldoamine
26	KR	+367.1314§ (+C15H21N5O4S)	+54.0106 (+C3H2O)		Malondialdehyde Schiff base	ARP mda sb
27	R	+367.1314§ (+C15H21N5O4S)	+54.0106 (+C3H2O)		MGH-3	ARP MGH-3
28	RK	+367.1314§ (+C15H21N5O4S)	+54.0106 (+C3H2O)		Methyl glyoxal Schiff Base	ARP mgo sb
29	KRCH	+369.1471 (+C15H23N5O4S)	+56.0262 (+C3H4O)		Acrolein Michael adduct	ARP acrolein ma
30	KRCH	+371.1263 (+C14H21N5O5S)	+58.0054 (+C2H2O2)		Glyoxal adduct	ARP go
31	KR	+381.1471 (+C16H23N5O4S)	+68.0262 (+C4H4O)		Diacetyl Schiff base	ARP diacetyl sb
32	KRCH	+383.1627 (+C16H25N5O4S)	+70.0418 (+C4H6O)		Crotonoaldehyde Michael adduct	ARP crotonoaldehyde ma
33	KRCH	+385.1420§ (+C15H23N5O5S)	+72.0211 (+C3H4O2)		Malondialdehyde Michael adduct	ARP mda ma
34	KRCH	+385.1420§ (+C15H23N5O5S)	+72.0211 (+C3H4O2)		Methyl glyoxal Michael adduct	ARP mgo ma
35	KRCH	+397.1784 (+C17H27N5O4S)	+84.0575 (+C5H8O)		Pentenal Michael adduct	ARP pentenal ma
36	KRC	+399.1577 (+C16H25N5O5S)	+86.0368 (+C4H6O2)		Diacetyl Michael adduct	ARP diacetyl ma
37	KR	+407.1627§ (+C18H25N5O4S)	+94.0419 (+C6H6O)		4-oxo-2-hexenal (OHE) Schiff base	ARP ohe sb
38	K	+407.1627§ (+C18H25N5O4S)	+94.0419 (+C6H6O)		N-(3-formyl-3,4-dehydropiperidino)lysine (FDP)	ARP lys fdp
39	K	+419.1263 (+C18H21N5O5S)	+106.0055 (+C6H2O2)		Dehydrogenated pyrraline	ARP pyrraline minH2
40	K	+421.1420 (+C18H23N5O5S)	+108.0211 (+C6H4O2)		Pyrraline	ARP pyrraline
41	KRCH	+425.1733 (+C18H27N5O5S)	+112.0524 (+C6H8O2)		4-oxo-2-hexenal (OHE) Michael adduct	ARP ohe ma
42	KRCH	+427.1889 (+C18H29N5O5S)	+114.0680 (+C6H10O2)		4-hydroxy-2-hexenal (HHE) Michael adduct	ARP hhe ma
43	KR	+449.2097 (+C21H31N5O4S)	+136.0888 (+C9H12O)		4-oxo-2-nonenal (ONE) Schiff base	ARP one sb
44	KR	+457.1631 (+C18H27N5O7S)	+144.0422 (+C6H8O4)		Deoxyglucosone Schiff base	ARP deoxyglucosone sb
45	KRCH	+467.2202 (+C21H33N5O5S)	+154.0993 (+C9H14O2)		4-oxo-2-nonenal (ONE) Michael adduct	ARP one ma
46	KRCH	+469.2359 (+C21H35N5O5S)	+156.1150 (+C9H16O2)		4-hydroxy-2-nonenal (HNE) Michael adduct	ARP hne ma
47	KRCH	+475.1737§ (+C18H29N5O8S)	+162.0528 (+C6H10O5)		Deoxyglucosone AGE intermediate	ARP deoxyglucosone
48	K	+475.1737§ (+C18H29N5O8S)	+162.0528 (+C6H10O5)		Hexose-derived Amadori product	ARP hexose
# The abbreviation “ARP” corresponds to the missing part of the ARP reagent after derivatization. The red annotation highlights modification prior to derivatization.
§ Isomeric mass shifts with same amino acid specificity.
* Alternative sites that could generate structural isomers.

## Sheet: Table S2
	ARP-Plasma:ARP-OxHSA		ARP-OxHSA Dilution Series		ARP-Plasma Upscale
Threshold Level	PEAKS DB	PEAKS PTM	PEAKS DB	PEAKS PTM	PEAKS DB	PEAKS PTM
PSM	0.008	0.009	-	0.011	0.009	0.014
Peptide	0.046	0.049	-	0.049	0.05	0.049
Protein Group	0	0.097	-	0.179	0	0.121
-10lgP	8.1	18.9		29.5	8.2	19.7

## Sheet: Table S3
Peptide #	Protein Accession	Protein Name	Peptide Modified Sequence	Modification Site [SwissProt canonical]$	Modification Site [Mature]$	Confidence Level	z	m/z	Best -10lgP§	ARP-Plasma Upscale	ARP-Plasma:ARP-OxHSA	ARP-OxHSA Dilution Series
1	A0A0C4DH55	Immunoglobulin kappa variable 3D-7	YQQ[+314.1]KPGQAPR	Q62	Q39	Confident	3	496.246	15.47	X
	P04433	Immunoglobulin kappa variable 3-11		Q58	Q38
2	P00450	Ceruloplasmin	EVGPTNAD[+313.1]	D531	D512	Confident	2	558.243	9.82	X
3	P00738	Haptoglobin	AVGDKLPEC[+57]EADD[+313.1]	D90	D72	Confident	2	866.369	55.46	X
4	P00738	Haptoglobin	YVMLPVADQD[+313.1]	D307	D289	Confident	2	732.337	44.40	X
5	P00738	Haptoglobin	YVMLPVADQDQ[+314.1]C[+57]IR	Q308	D289	Confident	2	1011.47	37.36	X
6	P00738	Haptoglobin	VTSIQ[+314.1]DWVQK	Q396	Q378	Confident	2	759.374	57.46	X
7	P00739	Haptoglobin-related protein	NPANPVQ[+314.1]R	Q102	Q102	Confident	2	605.293	53.29	X
8	P00739	Haptoglobin-related protein	GSFPWQ[+314.1]AK	Q118	Q118	Confident	2	617.787	30.38	X
9	P00739	Haptoglobin-related protein	YVMLPVAD[+313.1]	D247	D247	Confident	2	610.794	48.96	X
10	P00739	Haptoglobin-related protein	SPVGVQ[+314.1]PILNEHTF	Q273	Q273	Confident	2, 3	926.457, 617.973	31.93, 24.67	X
11	P00751	Complement factor B	FLC[+57]TGGVSPYAD[+313.1]	D691	D666	Confident	2	800.350	44.42	X
12	P01009	Alpha-1-antitrypsin	EDPQGDAAQ[+314.1]K	Q33	Q9	Confident	2	686.794	47.68	X
13	P01009	Alpha-1-antitrypsin	LGMFN[+314.1]IQHC[+57]K	N252	N228	Confident	3	521.241	11.47	X
14	P01009	Alpha-1-antitrypsin	LQ[+314.1]HLENELTHDIITK	Q285	Q261	Ambiguous	4	530.272	27.52	X
15	P01009	Alpha-1-antitrypsin	SVLGQ[+314.1]LGITK	Q329	Q305	Confident	2	665.363	64.33	X
16	P01009	Alpha-1-antitrypsin	FN[+314.1]KPFVF	N391	N367	Confident	2	606.797	9.99	X
17	P01009	Alpha-1-antitrypsin	VVN[+314.1]PTQK	N414	N390	Confident	2	550.282	44.62	X
18	P01009	Alpha-1-antitrypsin	VVNPTQ[+314.1]K	Q417	Q393	Confident	2	550.282	38.36	X
19	P01011	Alpha-1-antichymotrypsin	AKWEMPFD[+313.1]	D222	D198*	Confident	2	668.794	31.34	X
20	P01024	Complement C3	VPVAVQGED[+313.1]	D395	D373	Confident	2	613.795	29.41	X
21	P01024	Complement C3	KQELSEAEQ[+314.1]ATR	Q436	Q414	Confident	2	852.404	20.59	X
22	P01024	Complement C3	TSSSGQQ[+314.1]TAQR	Q653	Q631	Confident	2	732.828	8.73	X
23	P01024	Complement C3	TSSSGQQTAQ[+314.1]R	Q656	Q634	Confident	2	732.828	20.67	X
24	P01024	Complement C3	SVQ[+314.1]LTEK	Q674	Q652	Confident	2	559.779	22.74	X
25	P01024	Complement C3	TGLQ[+314.1]EVEVK	Q908	Q886	Confident	2	658.829	53.25	X
26	P01024	Complement C3	HLIVTPSGC[+57]GEQ[+314.1]N	Q1013	Q991	Confident	2	863.388	58.12	X
27	P01857	Immunoglobulin heavy constant gamma 1	GPSVFPLAP[+329.1]SSK	P13	P13	Confident	2	758.385	13.45	X
	P0DOX5	Immunoglobulin gamma-1 heavy chain		P132	P132
28	P01857	Immunoglobulin heavy constant gamma 1	IC[+57]N[+314.1]VNHKPSNTK	N84	N84	Confident	3	575.943	28.31	X
	P0DOX5	Immunoglobulin gamma-1 heavy chain		N203	N203
29	P01857	Immunoglobulin heavy constant gamma 1	IC[+57]NVNHK[+312.1]PSNTK	K88	K88	Confident	3	575.272	30.80	X
	P0DOX5	Immunoglobulin gamma-1 heavy chain		K207	K207
30	P01859	Immunoglobulin heavy constant gamma 2	TC[+57]N[+314.1]VDHKPSNTK	N84	N84	Confident	3, 4	572.259, 429.446	11.48, 16.77	X
	P01861	Immunoglobulin heavy constant gamma 4		N84	N84
31	P01859	Immunoglobulin heavy constant gamma 2	TPEVTC[+57]VVVD[+313.1]	D144	D144	Confident	2	716.334	52.22	X
32	P01857	Immunoglobulin heavy constant gamma 1	TPEVTC[+57]VVVDVSHED[+313.1]	D153	D153	Confident	2, 3	999.948, 666.968	37.98, 44.26	X
	P01859	Immunoglobulin heavy constant gamma 2		D149	D149
	P01860	Immunoglobulin heavy constant gamma 3		D200	D200
	P0DOX5	Immunoglobulin gamma-1 heavy chain		D272	D272
33	P01857	Immunoglobulin heavy constant gamma 1	FN[+314.1]WYVDGVEVHNAK	N159	N159	Confident	3	664.640	71.90	X
	P01859	Immunoglobulin heavy constant gamma 2		N155	N155
	P01861	Immunoglobulin heavy constant gamma 4		N156	N156
	P0DOX5	Immunoglobulin gamma-1 heavy chain		N278	N278
34	P01857	Immunoglobulin heavy constant gamma 1	N[+314.1]QVSLTC[+57]LVK	N244	N244	Confident	2	738.371	77.05	X
	P01859	Immunoglobulin heavy constant gamma 2		N240	N240
	P01860	Immunoglobulin heavy constant gamma 3		N291	N291
	P01861	Immunoglobulin heavy constant gamma 4		N240	N240
	P0DOX5	Immunoglobulin gamma-1 heavy chain		N363	N363
35	P01859	Immunoglobulin heavy constant gamma 2	TTPPMLDSD[+313.1]	D280	D280	Confident	2	645.279	37.45	X
36	P01857	Immunoglobulin heavy constant gamma 1	SC[+57]SVMHEALHNHYTQ[+314.1]K	Q321	Q321	Confident	3	752.663	29.74	X
	P01859	Immunoglobulin heavy constant gamma 2		Q317	Q317
	P01861	Immunoglobulin heavy constant gamma 4		Q318	Q318
	P0DOX5	Immunoglobulin gamma-1 heavy chain		Q440	Q440
37	P01857	Immunoglobulin heavy constant gamma 1	SVMHEALHNHYTQ[+314.1]K	Q321	Q321	Confident	3	670.309	50.07	X
	P01859	Immunoglobulin heavy constant gamma 2		Q317	Q317
	P01861	Immunoglobulin heavy constant gamma 4		Q318	Q318
	P0DOX5	Immunoglobulin gamma-1 heavy chain		Q440	Q440
38	P01857	Immunoglobulin heavy constant gamma 1	TVLHQ[+314.1]DWLNGK	Q195	Q195	Confident	3	542.268	51.96	X
	P01860	Immunoglobulin heavy constant gamma 3		Q241	Q241
	P01861	Immunoglobulin heavy constant gamma 4		Q191	Q191
	P0DOX5	Immunoglobulin gamma-1 heavy chain		Q313	Q313
39	P01857	Immunoglobulin heavy constant gamma 1	VVSVLTVLHQD[+313.1]	D195	D195	Confident	2	761.906	53.52	X
	P01860	Immunoglobulin heavy constant gamma 3		D242	D242
	P01861	Immunoglobulin heavy constant gamma 4		D192	D192
	P0DOX5	Immunoglobulin gamma-1 heavy chain		D314	D314
40	P01857	Immunoglobulin heavy constant gamma 1	ALP[+329.1]APIEK	P212	P212	Confident	2	584.313	14.67	X
	P01860	Immunoglobulin heavy constant gamma 3		P259	P259
	P0DOX5	Immunoglobulin gamma-1 heavy chain		P331	P331
41	P01857	Immunoglobulin heavy constant gamma 1	ALPAPIE[+313.1]K	E216	E216	Confident	2	576.316	21.96	X
	P01860	Immunoglobulin heavy constant gamma 3		E263	E263
	P0DOX5	Immunoglobulin gamma-1 heavy chain		E335	E335
42	P01857	Immunoglobulin heavy constant gamma 1	TTPPVLDSD[+313.1]	D284	D284	Confident	2	629.293	35.32	X
	P01861	Immunoglobulin heavy constant gamma 4		D281	D281
	P0DOX5	Immunoglobulin gamma-1 heavy chain		D403	D403
43	P01871	Immunoglobulin heavy constant mu	YAATSQ[+314.1]VLLPSK	Q70	Q70	Ambiguous	2	796.411	35.14	X
44	P01876	Immunoglobulin heavy constant alpha 1	HYTNPSQD[+313.1]	D96	D96	Confident	2	637.765	28.57	X
45	P01876	Immunoglobulin heavy constant alpha 1	WLQ[+314.1]GSQELPR	Q266	Q266	Confident	2	764.372	28.61	X
	P01877	Immunoglobulin heavy constant alpha 2		Q253	Q253
	P0DOX2	Immunoglobulin alpha-2 heavy chain		Q368	Q368
46	P01876	Immunoglobulin heavy constant alpha 1	WLQGSQ[+314.1]ELPR	Q269	Q269	Confident	2	764.372	68.67	X
	P01877	Immunoglobulin heavy constant alpha 2		Q256	Q256
	P0DOX2	Immunoglobulin alpha-2 heavy chain		Q371	Q371
47	P02647	Apolipoprotein A-I	DEPPQ[+314.1]SPWDR	Q29	Q11	Confident	2	770.828	9.01	X
48	P02647	Apolipoprotein A-I	DYVSQ[+314.1]FEGSALGK	Q56	Q38	Confident	2	857.891	47.49	X
49	P02647	Apolipoprotein A-I	VQ[+314.1]PYLDDFQK	Q122	Q104	Confident	2	783.866	63.00	X
50	P02647	Apolipoprotein A-I	VQ[+314.1]PYLDDFQKK	Q122	Q104	Confident	3	565.612	62.52	X
51	P02647	Apolipoprotein A-I	AELQ[+314.1]EGAR	Q151	Q133	Confident	2	594.277	55.50	X
52	P02647	Apolipoprotein A-I	RAELQ[+314.1]EGAR	Q151	Q133	Confident	3	448.554	22.80	X
53	P02647	Apolipoprotein A-I	LHELQ[+314.1]EK	Q162	Q144	Confident	2, 3	605.798, 404.201	40.31, 23.59	X
54	P02647	Apolipoprotein A-I	LSPLGEE[+313.1]MR	E171	E153	Confident	2	672.824	40.02	X
55	P02647	Apolipoprotein A-I	AKPALED[+313.1]	D237	D219	Confident	2	528.761	34.72	X
56	P02652	Apolipoprotein A-II	FQ[+314.1]TVTDYGK	Q39	Q21	Confident	2	686.814	57.98	X
57	P02652	Apolipoprotein A-II	SPELQ[+314.1]AEAK	Q58	Q40	Confident	2	643.806	52.88	X
58	P02652	Apolipoprotein A-II	SPELQAE[+313.1]AK	E60	E42	Confident	2	643.314	10.14	X
59	P02652	Apolipoprotein A-II	SKEQ[+314.1]LTPLIK	Q71	Q53	Confident	3	490.938	19.23	X
60	P02652	Apolipoprotein A-II	FVELGTQPATQ[+314.1]	Q100	Q82	Confident	2	752.859	43.11	X
61	P02671	Fibrinogen alpha chain	VQHIQ[+314.1]LLQK	Q153	Q134	Confident	3	474.262	12.43	X
62	P02671	Fibrinogen alpha chain	DYEDQQ[+314.1]K	Q201	Q182	Confident	2	620.251	13.35	X
63	P02671	Fibrinogen alpha chain	QLEQ[+314.1]VIAK	Q206	Q187	Confident	2	621.829	30.60	X
64	P02671	Fibrinogen alpha chain	SQLQK[+312.1]VPPEWK	K243	K224	Confident	2	826.417	33.72	X
65	P02671	Fibrinogen alpha chain	ALTDMPQ[+314.1]MR	Q256	Q237	Confident	2	688.8100	70.74	X
66	P02671	Fibrinogen alpha chain	LVTSK[+312.1]GDK	K437	K418	Confident	2	580.292	36.93*	X	X*
67	P02671	Fibrinogen alpha chain	HRHPDEAAFFD[+313.1]	D521	D502	Confident	3	552.244	9.56	X
68	P02675	Fibrinogen beta chain	ARPAK[+312.1]AAATQK	K77	K47	Confident	3	475.586	48.49	X
69	P02675	Fibrinogen beta chain	APDAGGC[+57]LHAD[+313.1]	D99	D69	Confident	2	698.790	12.15	X
70	P02675	Fibrinogen beta chain	KAPDAGGC[+57]LHAD[+313.1]	D99	D69	Confident	2, 3	762.838, 508.894	27.83, 53.18	X
71	P02675	Fibrinogen beta chain	SILEN[+314.1]LR	N204	N174	Confident	2	579.800	9.53	X
72	P02675	Fibrinogen beta chain	QGFGNVATNTD[+313.1]	D311	D281	Confident	2	718.815	35.19	X
73	P02675	Fibrinogen beta chain	AHYGGFTVQ[+314.1]NEANK	Q362	Q332	Confident	3	617.281	33.53	X
74	P02675	Fibrinogen beta chain	YQ[+314.1]ISVNK	Q369	Q339	Confident	2	583.287	34.47	X
75	P02675	Fibrinogen beta chain	GTAGNALMD[+313.1]	D385	D355	Confident	2	581.753	32.58	X
76	P02675	Fibrinogen beta chain	DNDGWLTSD[+313.1]	D419	D389	Confident	2	668.267	59.45	X
77	P02675	Fibrinogen beta chain	IRPFFPQ[+314.1]	Q490	Q460	Confident	2	609.808	-	X
78	P02675	Fibrinogen beta chain	IRPFFPQ[+314.1]Q	Q490	Q460	Confident	2	673.837	34.45	X
79	P02679	Fibrinogen gamma chain	DC[+57]Q[+314.1]DIANK	Q180	Q154	Confident	2	639.266	57.26	X
80	P02679	Fibrinogen gamma chain	IHLISTQ[+314.1]SAIPY	Q265	Q239	Confident	2	828.924	13.31	X
81	P02679	Fibrinogen gamma chain	LTIGEGQ[+314.1]QHHLGGAK	Q424	Q398	Confident	2, 3, 4	930.463, 620.644, 465.735	35.58, 52.01, 34.02	X
82	P02765	Alpha-2-HS-glycoprotein	HTLNQ[+314.1]IDEVK	Q62	Q44	Ambiguous	2	755.870	10.10	X
83	P02768	Serum albumin	D[+283.1]AHKSEVAHR	D25	D1	Confident	3	478.234	78.36a			X#
84	P02768	Serum albumin	AHK[+327.1]SEVAHR	K28	K4	Confident	3	454.555	44.72#			X#
85	P02768	Serum albumin	DAHK[+312.1]SEVAHR	K28	K4	Confident	3	487.893	41.03*	X	X*
86	P02768	Serum albumin	SEVAHR[+270.1]FK	R34	R10	Confident	2, 3#	622.298, 415.201#	9.03*, 59.8#	X	X*	X#
87	P02768	Serum albumin	FK[+298.1]DLGEENFK	K36	K12	Confident	2	762.843	89.79#			X#
88	P02768	Serum albumin	FK[+312.1]DLGEENFK	K36	K12	Confident	2	769.851	59.82*	X	X	X*
89	P02768	Serum albumin	FK[+327.1]DLGEENFK	K36	K12	Confident	3	518.573	87.01#			X#
90	P02768	Serum albumin	FK[+355.1]DLGEENFK	K36	K12	Confident	3	527.917	53.29	X
91	P02768	Serum albumin	K[+312.1]DLGEENFK	K36	K12	Confident	2	696.317	70.21#		X#	X#
92	P02768	Serum albumin	K[+475.2]DLGEENFK	K36	K12	Ambiguous	2	777.859	55.93#		X#	X#
93	P02768	Serum albumin	FKDL[+327.1]GEENFK	L38	L14	Confident	3	518.573	55.86#			X#
94	P02768	Serum albumin	DLGE[+313.1]ENFK	E40	E16	Confident	2	632.785	49.64	X
95	P02768	Serum albumin	FKDLGE[+313.1]ENFK	E40	E16	Confident	2, 3	770.367, 513.914	15.66, 31.75	X
96	P02768	Serum albumin	FKDLGEE[+313.1]NFK	E41	E17	Confident	2	770.367	61.15	X
97	P02768	Serum albumin	DLGEEN[+314.1]FK	N42	N18	Confident	2	633.277	55.07	X
98	P02768	Serum albumin	FKDLGEEN[+314.1]FK	N42	N18	Confident	2, 3	770.859, 514.242	64.34, 63.15	X
99	P02768	Serum albumin	FAQ[+314.1]YLQQC[+57]PFEDHVK	Q53	Q29	Confident	3	742.003	57.42	X
100	P02768	Serum albumin	AQYLQ[+314.1]QC[+57]PFEDHVK	Q56	Q32	Confident	2, 3	1038.967, 692.980	65.9, 46.15	X	X
101	P02768	Serum albumin	FAQYLQ[+314.1]QC[+57]PFEDHVK	Q56	Q32	Confident	3	742.003	62.88	X
102	P02768	Serum albumin	LQ[+314.1]QC[+57]PFEDHVK	Q56	Q32	Confident	2, 3	857.887, 572.261	49.11, 42.53	X
103	P02768	Serum albumin	YLQ[+314.1]QC[+57]PFEDHVK	Q56	Q32	Confident	2, 3	939.419, 626.615	44.21, 47.53	X
104	P02768	Serum albumin	LQQC[+369.1]PFEDHVK	C58	C34	Confident	3, 3	571.601, 571.601	30.85, 30.85	X
105	P02768	Serum albumin	LQQC[+57]P[+329.1]FEDHVK	P59	P35	Confident	3	577.264	37.39	X
106	P02768	Serum albumin	P[+329.1]FEDHVK	P59	P35	Confident	3	400.854	58.68#			X#
107	P02768	Serum albumin	L[+313.1]VNEVTEFAK	L66	L42	Confident	2	731.853	106.76#			X#
108	P02768	Serum albumin	LVN[+314.1]EVTEF	N68	N44	Confident	2	632.798	24.21	X
109	P02768	Serum albumin	LVN[+314.1]EVTEFAK	N68	N44	Confident	2	732.364	77.73	X
110	P02768	Serum albumin	LVNE[+313.1]VTEFAK	E69	E45	Confident	2	731.872	51.43	X
111	P02768	Serum albumin	LVNEVT[+311.1]EFAK	T71	T47	Confident	2	730.864	86.94#		X#	X#
112	P02768	Serum albumin	LVNEVTE[+313.1]FAK	E72	E48	Confident	2	731.872	68.98	X
113	P02768	Serum albumin	AK[+312.1]TC[+57]VADESAENC[+57]DK	K75	K51	Confident	2, 3	1005.404, 670.605	67.24#, 65.57#		X#	X#
114	P02768	Serum albumin	LVNEVTEFAK[+327.1]	K75	K51	Confident	2	738.861	74.59#			X#
115	P02768	Serum albumin	T[+311.1]C[+57]VADESAENC[+57]DK	T76	T52	Ambiguous	2	905.345	72.75#		X#
116	P02768	Serum albumin	TC[+57]VADE[+313.1]SAENC[+57]DK	E81	E57	Confident	2	906.353	42.74	X
117	P02768	Serum albumin	TC[+57]VADES[+311.1]AENC[+57]DK	S82	S58	Ambiguous	3	603.899	52.94#		X#
118	P02768	Serum albumin	TC[+57]VADESAE[+313.1]NC[+57]DK	E84	E60	Confident	2	906.353	82.88	X
119	P02768	Serum albumin	TC[+57]VADESAEN[+314.1]C[+57]DK	N85	N61	Confident	2, 3	906.845, 604.899	81.1, 76.49	X
120	P02768	Serum albumin	TC[+57]VADESAENC[+397.2]DK	C86	C62	Ambiguous	3	613.583	52.55#			X#
121	P02768	Serum albumin	TC[+57]VADESAENC[+57]D[+313.1]	D87	D63	Confident	2	842.306	75.92	X
122	P02768	Serum albumin	L[+312.1]HTLFGDK	L90	L66	Confident	2	621.800	53.56#		X#
123	P02768	Serum albumin	L[+313.1]HTLFGDK	L90	L66	Ambiguous	2	622.298	27.97	X
124	P02768	Serum albumin	SL[+313.1]HTLFGDK	L90	L66	Confident	3	444.212	89.35#			X#
125	P02768	Serum albumin	SL[+327.1]HTLFGDK	L90	L66	Ambiguous	2, 3	672.822, 448.884	58.84#, 79.33#			X#
126	P02768	Serum albumin	LH[+383.2]TLFGDK	H91	H67	Ambiguous	2	657.337	41.64*	X	X*
127	P02768	Serum albumin	SLHT[+311.1]LFGDK	T92	T68	Confident	3	443.552	63.74#		X#	X#
128	P02768	Serum albumin	SLHTL[+313.1]FGDK	L93	L69	Ambiguous	3	444.212	41.59#			X#
129	P02768	Serum albumin	SLHTL[+327.1]FGDK	L93	L69	Confident	3	448.884	59.81#			X#
130	P02768	Serum albumin	SLHTLFGD[+313.1]	D96	D72	Confident	2	601.785	49.67	X
131	P02768	Serum albumin	L[+312.1]C[+57]TVATLR	L98	L74	Confident	2	623.308	52.93#		X#
132	P02768	Serum albumin	L[+313.1]C[+57]TVATLR	L98	L74	Confident	2	623.805	81.00#		X#	X#
133	P02768	Serum albumin	LC[+397.2]TVATLR	C99	C75	Ambiguous	3	425.230	50.17#			X#
134	P02768	Serum albumin	LC[+57]T[+311.1]VATLR	T100	T76	Confident	2	622.816	55.99#		X#	X#
135	P02768	Serum albumin	LC[+57]TVA[+327.1]TLR	A102	A78	Confident	2	630.813	48.08#			X#
136	P02768	Serum albumin	LC[+57]TVAT[+311.1]LR	T103	T79	Confident	2	622.816	39.87*	X	X*	X
137	P02768	Serum albumin	LC[+57]TVATL[+313.1]R	L104	L80	Confident	2	623.805	71.26#			X#
138	P02768	Serum albumin	LC[+57]TVATL[+327.1]R	L104	L80	Confident	2	630.813	72.95#		X#	X#
139	P02768	Serum albumin	E[+313.1]TYGEMADC[+57]C[+57]AK	E106	E82	Confident	2	874.331	50.76	X
140	P02768	Serum albumin	ET[+311.1]YGEMADC[+57]C[+57]AK	T107	T83	Confident	2	873.323	30.53	X
141	P02768	Serum albumin	ETYGE[+313.1]MADC[+57]C[+57]AK	E110	E86	Confident	2	874.331	80.10	X
142	P02768	Serum albumin	ETYGEM[+281.1]ADC[+57]C[+57]AK	M111	M87	Confident	2	858.327	26.48*	X	X*	X
143	P02768	Serum albumin	ETYGEMAD[+313.1]C[+57]C[+57]AK	D113	D89	Confident	2	874.331	-	X
144	P02768	Serum albumin	N[+314.1]EC[+57]FLQHK	N123	N99	Confident	3	463.873	58.20*	X	X*
145	P02768	Serum albumin	QEPERN[+314.1]EC[+57]FLQHK	N123	N99	Ambiguous	4	507.981	40.99	X
146	P02768	Serum albumin	NE[+313.1]C[+57]FLQHK	E124	E100	Confident	3	463.545	22.31	X
147	P02768	Serum albumin	QEPERNEC[+371.1]FLQHK	C125	C101	Ambiguous	4	507.981	35.19#		X#
148	P02768	Serum albumin	NEC[+57]FL[+327.1]QHK	L127	L103	Confident	3	468.205	39.71#			X#
149	P02768	Serum albumin	NEC[+57]FLQ[+314.1]HK	Q128	Q104	Confident	2, 3	695.306, 463.873	60.53, 21.08	X
150	P02768	Serum albumin	HK[+312.1]DDNPNLPR	K130	K106	Ambiguous	3	506.569	45.08#		X#	X#
151	P02768	Serum albumin	K[+312.1]DDNPNLPR	K130	K106	Confident	2	690.820	88.73#		X#	X#
152	P02768	Serum albumin	NEC[+57]FLQHK[+312.1]DDNPNLPR	K130	K106	Confident	3	770.344	78.52#		X#	X#
153	P02768	Serum albumin	NEC[+57]FLQHK[+327.1]DDNPNLPR	K130	K106	Confident	4	581.763	54.33#			X#
154	P02768	Serum albumin	NEC[+57]FLQHKD[+313.1]	D131	D107	Confident	2	752.327	44.69	X
155	P02768	Serum albumin	QEPERNEC[+57]FLQHKD[+313.1]	D131	D107	Confident	3	714.986	31.04	X
156	P02768	Serum albumin	NEC[+57]FLQHKDDN[+314.1]PNLPR	N133	N109	Ambiguous	4	578.514	8.21	X
157	P02768	Serum albumin	DDNP[+329.1]NLPR	P134	P110	Confident	2	635.286	15.07*	X	X	X*
158	P02768	Serum albumin	DDNPN[+314.1]LPR	N135	N111	Ambiguous	2	627.780	60.92	X
159	P02768	Serum albumin	DDNPNL[+327.1]PR	L136	L112	Confident	2	634.278	65.22#			X#
160	P02768	Serum albumin	DDNPNLP[+329.1]R	P137	P113	Confident	2	635.286	15.07*	X	X*	X
161	P02768	Serum albumin	L[+313.1]VRPEVDVM	L139	L115	Confident	2	685.831	43.55#			X#
162	P02768	Serum albumin	LVRPE[+313.1]VDVM	E143	E119	Confident	2	685.850	25.41	X
163	P02768	Serum albumin	A[+312.1]FHDNEETFLK	A150	A126	Confident	2	831.864	50.31#		X#
164	P02768	Serum albumin	C[+57]TAFHDNEETFLK[+312.1]K	K160	K136	Confident	3	684.637	66.82#			X#
165	P02768	Serum albumin	C[+57]TAFHDNEETFLKK[+312.1]	K161	K137	Ambiguous	3	684.637	62.59#		X#
166	P02768	Serum albumin	YL[+313.1]YEIAR	L163	L139	Confident	2	620.793	58.17#			X#
167	P02768	Serum albumin	YL[+327.1]YEIAR	L163	L139	Confident	2	627.800	44.51#			X#
168	P02768	Serum albumin	YLYEI[+327.1]AR	I166	I142	Confident	2	627.800	74.39#			X#
169	P02768	Serum albumin	YLYEIAR[+270.1]R	R168	R144	Confident	2	677.335	40.37*	X	X	X*
170	P02768	Serum albumin	YK[+298.1]AAFTEC[+57]C[+57]QAADK	K186	K162	Ambiguous	2, 3	980.903, 654.271	81.05#, 84.00#			X#
171	P02768	Serum albumin	YK[+312.1]AAFTEC[+57]C[+57]QAADK	K186	K162	Confident	2, 3	987.911, 658.943	84.24#, 82.97#		X#	X#
172	P02768	Serum albumin	AAFT[+311.1]EC[+57]C[+57]QAADK	T190	T166	Confident	2	841.840	76.99#		X#
173	P02768	Serum albumin	AAFTEC[+57]C[+57]Q[+314.1]AADK	Q194	Q170	Confident	2, 3	843.339, 562.562	87.36, 59.44	X	X
174	P02768	Serum albumin	A[+312.1]AC[+57]LLPK	A199	A175	Ambiguous	2	542.768	21.64	X
175	P02768	Serum albumin	AAC[+57]L[+313.1]LPK	L202	L178	Ambiguous	2	543.265	61.76#			X#
176	P02768	Serum albumin	AAC[+57]L[+327.1]LPK	L202	L178	Confident	2	550.273	60.88#		X#	X#
177	P02768	Serum albumin	AAC[+57]LL[+313.1]PK	L203	L179	Confident	2	543.265	68.98#			X#
178	P02768	Serum albumin	AAC[+57]LL[+327.1]PK	L203	L179	Confident	2	550.273	55.35#		X#
179	P02768	Serum albumin	AAC[+57]LL[+327.1]PK	L203	L179	Confident	2	550.273	60.70#		X#	X#
180	P02768	Serum albumin	AAC[+57]LLP[+329.1]K	P204	P180	Confident	2	551.281	10.49*	X	X	X*
181	P02768	Serum albumin	AAC[+57]LLPK[+312.1]LDELR	K205	K181	Confident	2	855.937	65.26#		X#
182	P02768	Serum albumin	AAC[+57]LLPK[+312.1]LDELRDEGK	K205	K181	Confident	3	714.022	47.42#		X#
183	P02768	Serum albumin	AAC[+57]LLPK[+327.1]	K205	K181	Confident	2	550.273	61.58#		X#	X#
184	P02768	Serum albumin	LD[+313.1]ELRDEGK	D207	D183	Confident	2, 3	694.335, 463.226	34.84, 31.15	X
185	P02768	Serum albumin	LDELR[+270.1]DEGK	R210	R186	Ambiguous	2	672.809	58.56*	X	X	X*
186	P02768	Serum albumin	DEGK[+312.1]ASSAK	K214	K190	Confident	2	602.767	32.52	X
187	P02768	Serum albumin	DEGK[+383.2]ASSAK	K214	K190	Ambiguous	2	638.304	30.53	X
188	P02768	Serum albumin	LDELRDEGK[+298.1]ASSAK	K214	K190	Confident	3	606.288	70.17#			X#
189	P02768	Serum albumin	LDELRDEGK[+312.1]ASSAK	K214	K190	Confident	2, 3	915.936, 610.960	63.77*, 48.48*	X	X*	X
190	P02768	Serum albumin	LDELRDEGK[+355.1]ASSAK	K214	K190	Confident	3, 4	625.307, 469.232	37.69, 35.32	X
191	P02768	Serum albumin	LDELRDEGK[+369.1]ASSAK	K214	K190	Confident	3, 4	629.979, 472.736	39.30, 21.16	X
192	P02768	Serum albumin	LDELRDEGK[+383.2]ASSAK	K214	K190	Confident	2, 3	951.473, 634.651	33.88, 39.79	X
193	P02768	Serum albumin	LDELRDEGK[+385.1]ASSAK	K214	K190	Confident	3	635.311	22.68	X
194	P02768	Serum albumin	ASSAK[+312.1]QR	K219	K195	Confident	2	530.254	10.04	X
195	P02768	Serum albumin	ASSAK[+369.1]QR	K219	K195	Ambiguous	2	558.783	36.30	X
196	P02768	Serum albumin	ASSAK[+427.2]QR	K219	K195	Ambiguous	2	587.803	29.23	X
197	P02768	Serum albumin	R[+407.2]LKC[+57]ASLQK	R221	R197	Ambiguous	2	755.903	23.58	X
198	P02768	Serum albumin	LK[+312.1]C[+57]ASLQK	K223	K199	Confident	2	630.315	23.22*	X	X	X*
199	P02768	Serum albumin	LK[+355.1]C[+57]ASLQK	K223	K199	Confident	2, 3	651.836, 434.893	36.4, 41.44	X	X
200	P02768	Serum albumin	LK[+367.1]CASLQK	K223	K199	Ambiguous	2	629.326	44.52#			X#
201	P02768	Serum albumin	LK[+369.1]C[+57]ASLQK	K223	K199	Confident	2, 3	658.844, 439.565	28.78, 45.62	X
202	P02768	Serum albumin	LK[+369.1]C[+57]ASLQK	K223	K199	Confident	3	439.565	50.79#		X#
203	P02768	Serum albumin	LK[+383.2]C[+57]ASLQK	K223	K199	Ambiguous	2, 2	665.852, 665.852	59.96, 59.96	X
204	P02768	Serum albumin	LK[+383.2]C[+57]ASLQK	K223	K199	Ambiguous	2	665.852	56.97#		X#
205	P02768	Serum albumin	LK[+385.1]C[+57]ASLQK	K223	K199	Confident	3	444.897	34.37	X
206	P02768	Serum albumin	LK[+427.2]C[+57]ASLQK	K223	K199	Ambiguous	2	687.865	29.46	X
207	P02768	Serum albumin	LK[+475.2]C[+57]ASLQK	K223	K199	Confident	3	474.908	35.50	X
208	P02768	Serum albumin	ASLQK[+312.1]FGER	K229	K205	Confident	2	674.327	36.74#		X#
209	P02768	Serum albumin	C[+57]ASLQK[+312.1]FGER	K229	K205	Confident	2	754.343	75.84#		X#
210	P02768	Serum albumin	FGER[+270.1]AFK	R233	R209	Confident	2	562.763	34.45*	X	X	X*
211	P02768	Serum albumin	AFK[+298.1]AWAVAR	K236	K212	Confident	2	659.330	76.30#			X#
212	P02768	Serum albumin	AFK[+312.1]AWAVAR	K236	K212	Confident	2	666.338	77.16#		X#	X#
213	P02768	Serum albumin	AVAR[+270.1]LSQR	R242	R218	Ambiguous	2	585.806	32.40#			X#
214	P02768	Serum albumin	AWAVAR[+270.1]LSQR	R242	R218	Confident	2	714.364	83.53#		X#	X#
215	P02768	Serum albumin	LSQR[+270.1]FPK	R246	R222	Confident	2	573.292	55.00#		X#	X#
216	P02768	Serum albumin	FPK[+298.1]AEFAEVSK	K249	K225	Confident	2	775.869	91.60#		X#	X#
217	P02768	Serum albumin	FPK[+312.1]AEFAEVSK	K249	K225	Confident	2	782.877	94.64#		X#
218	P02768	Serum albumin	FPK[+312.1]AEFAEVSK	K249	K225	Confident	2, 3	782.877, 522.254	103.86#, 88.92#		X#	X#
219	P02768	Serum albumin	FPK[+327.1]AEFAEVSK	K249	K225	Confident	3	527.257	87.98#			X#
220	P02768	Serum albumin	FPK[+355.1]AEFAEVSK	K249	K225	Confident	3	536.601	40.67	X
221	P02768	Serum albumin	PK[+475.2]AEFAEVSK	K249	K225	Confident	3	527.592	33.41#			X#
222	P02768	Serum albumin	AE[+283.1]FAEVSK	E251	E227	Confident	2	582.279	72.16#			X#
223	P02768	Serum albumin	AEFAE[+283.1]VSK	E254	E230	Ambiguous	2	582.279	50.62#			X#
224	P02768	Serum albumin	AEFAE[+313.1]VSK	E254	E230	Confident	2	597.285	25.28	X
225	P02768	Serum albumin	AEFAEVSK[+327.1]	K257	K233	Confident	2	604.274	67.85#			X#
226	P02768	Serum albumin	L[+313.1]VTDLTK	L258	L234	Confident	2	551.782	58.10#			X#
227	P02768	Serum albumin	LVT[+311.1]DLTK	T260	T236	Confident	2	550.792	60.37#		X#	X#
228	P02768	Serum albumin	LVTDL[+313.1]TK	L262	L238	Confident	2	551.782	60.45#			X#
229	P02768	Serum albumin	LVTDL[+327.1]TK	L262	L238	Confident	2	558.790	49.00#			X#
230	P02768	Serum albumin	LVTDLT[+311.1]K	T263	T239	Confident	2	550.792	58.60#		X#	X#
231	P02768	Serum albumin	LVTDLTK[+327.1]	K264	K240	Confident	2	558.790	65.48#			X#
232	P02768	Serum albumin	VHTEC[+57]C[+57]HGD[+313.1]	D273	D249	Confident	2	714.266	29.45	X
233	P02768	Serum albumin	VHTEC[+57]C[+57]HGDLLE[+313.1]C[+57]ADDR	E276	E252	Confident	3, 4	800.658, 600.745	70.14, 19.64	X
234	P02768	Serum albumin	ADLAK[+312.1]YIC[+57]ENQDSISSK	K286	K262	Ambiguous	3	752.009	62.58#		X#	X#
235	P02768	Serum albumin	YIC[+57]E[+313.1]NQDSISSK	E290	E266	Confident	2	878.885	81.02	X
236	P02768	Serum albumin	IC[+57]ENQ[+314.1]DSISSK	Q292	Q268	Ambiguous	2	797.845	28.34	X
237	P02768	Serum albumin	YIC[+57]ENQ[+314.1]DSISSK	Q292	Q268	Confident	2, 3	879.377, 586.587	85.46, 68.02	X	X
238	P02768	Serum albumin	YIC[+57]ENQD[+313.1]	D293	D269	Confident	2	627.748	31.56	X
239	P02768	Serum albumin	YIC[+57]ENQDSI[+327.1]SSK	I295	I271	Confident	2, 3	885.875, 590.919	86.57#, 45.13#		X#	X#
240	P02768	Serum albumin	YIC[+57]ENQDSIS[+311.1]SK	S296	S272	Confident	2	877.877	81.18#		X#
241	P02768	Serum albumin	YIC[+57]ENQDSISSK[+298.1]LK	K298	K274	Confident	3	661.636	75.87#			X#
242	P02768	Serum albumin	YIC[+57]ENQDSISSK[+312.1]LK	K298	K274	Confident	2, 3	998.959, 666.308	85.12#, 72.46#		X#	X#
243	P02768	Serum albumin	YIC[+57]ENQDSISSK[+327.1]LK	K298	K274	Confident	3	671.312	67.72#		X#	X#
244	P02768	Serum albumin	L[+312.1]KEC[+57]C[+57]EKPLLEK	L299	L275	Confident	3	620.300	79.01#			X#
245	P02768	Serum albumin	LK[+298.1]EC[+57]C[+57]EKPLLEK	K300	K276	Confident	3	615.628	78.07#			X#
246	P02768	Serum albumin	LK[+312.1]EC[+57]C[+57]EKPLLEK	K300	K276	Confident	3	620.300	23.76*	X	X	X*
247	P02768	Serum albumin	LK[+353.1]ECC[+57]EKPLLEK	K300	K276	Ambiguous	3	614.969	46.02*	X	X*
248	P02768	Serum albumin	YIC[+57]ENQDSISSKLK[+327.1]	K300	K276	Confident	3	671.312	45.36#			X#
249	P02768	Serum albumin	E[+313.1]C[+57]C[+57]EKPLLEK	E301	E277	Ambiguous	3	540.251	30.40	X
250	P02768	Serum albumin	EC[+57]C[+57]EK[+298.1]PLLEK	K305	K281	Confident	2	802.349	72.33#			X#
251	P02768	Serum albumin	EC[+57]C[+57]EK[+312.1]PLLEK	K305	K281	Confident	2	809.357, 539.907	28.10*, 64.74#	X	X	X*#
252	P02768	Serum albumin	EC[+57]C[+57]EK[+327.1]PLLEK	K305	K281	Ambiguous	3	544.911	51.11#			X#
253	P02768	Serum albumin	ECC[+57]EK[+353.1]PLLEK	K305	K281	Ambiguous	2, 3	801.360, 534.576	-		X#
254	P02768	Serum albumin	LKEC[+57]C[+57]EK[+298.1]PLLEK	K305	K281	Confident	3	615.628	59.63#			X#
255	P02768	Serum albumin	LKEC[+57]C[+57]EK[+312.1]PLLEK	K305	K281	Confident	3	620.300	64.29#		X#	X#
256	P02768	Serum albumin	LKEC[+57]C[+57]EK[+355.1]PLLEK	K305	K281	Confident	3	634.648	-	X
257	P02768	Serum albumin	EC[+57]C[+57]EKPL[+313.1]LEK	L307	L283	Confident	3	540.239	72.52#			X#
258	P02768	Serum albumin	EC[+57]C[+57]EKPL[+327.1]LEK	L307	L283	Confident	3	544.911	73.96#			X#
259	P02768	Serum albumin	LKEC[+57]C[+57]EKPL[+313.1]LEK	L307	L283	Confident	4	465.726	47.89		X#
260	P02768	Serum albumin	EC[+57]C[+57]EKPLL[+313.1]EK	L308	L284	Confident	3	540.239	83.61#			X#
261	P02768	Serum albumin	EC[+57]C[+57]EKPLL[+327.1]EK	L308	L284	Confident	3	544.911	74.55#			X#
262	P02768	Serum albumin	LKEC[+57]C[+57]EKPLL[+313.1]EK	L308	L284	Confident	3, 4	620.632, 465.726	30.46#, 48.83#		X#	X#
263	P02768	Serum albumin	SHC[+57]IAEVEND[+313.1]	D320	D296	Confident	2	743.806	63.12	X
264	P02768	Serum albumin	SHC[+57]IAEVENDEMPAD[+313.1]	D325	D301	Confident	2, 3	1015.406, 677.273	37.65, 26.20	X
265	P02768	Serum albumin	DV[+327.1]C[+57]KNYAEAK	V339	V315	Ambiguous	3	508.891	61.96#			X
266	P02768	Serum albumin	DVC[+57]K[+312.1]NYAEAK	K341	K317	Ambiguous	2	755.327	54.39#		X#
267	P02768	Serum albumin	DVC[+57]K[+327.1]NYAEAK	K341	K317	Confident	3	508.891	45.87#		X#
268	P02768	Serum albumin	DVC[+57]K[+327.1]NYAEAK	K341	K317	Ambiguous	2, 3	762.832, 508.891	51.49#, 74.66#			X#
269	P02768	Serum albumin	HP[+329.1]DYSVVLLLR	P363	P339	Confident	3	547.624	104.53#		X#	X#
270	P02768	Serum albumin	LAK[+298.1]TYETTLEK	K375	K351	Confident	2, 3	797.893, 532.264	93.06#, 73.32#			X#
271	P02768	Serum albumin	LAK[+312.1]TYETTLEK	K375	K351	Confident	2, 3	804.901, 536.936	41.62*, 75.13#	X	X*#	X*#
272	P02768	Serum albumin	LAK[+327.1]TYETTLEK	K375	K351	Ambiguous	3	541.940	78.52#			X#
273	P02768	Serum albumin	TYET[+311.1]TLEK	T379	T355	Confident	2	648.300	62.07#		X#	X#
274	P02768	Serum albumin	TYETTLE[+283.1]K	E382	E358	Confident	2	634.303	66.43#			X#
275	P02768	Serum albumin	TYETTLE[+313.1]K	E382	E358	Confident	2	649.308	61.41	X
276	P02768	Serum albumin	TYETTLEK[+312.1]C[+57]	K383	K359	Confident	2	728.808	65.66#		X#
277	P02768	Serum albumin	TYETTLEK[+327.1]	K383	K359	Confident	2	656.298	69.18#			X#
278	P02768	Serum albumin	P[+329.1]LVEEPQNLIK	P403	P379	Confident	2	804.924	71.85#		X#	X#
279	P02768	Serum albumin	VFDEFKPL[+313.1]V	L404	L380	Ambiguous	2	703.842	39.12	X
280	P02768	Serum albumin	VE[+313.1]EPQNLIK	E406	E382	Confident	2	691.858	22.76	X
281	P02768	Serum albumin	VFDEFKPLVEE[+313.1]	E407	E383	Ambiguous	2	832.903	37.68	X
282	P02768	Serum albumin	VEEPQ[+314.1]NLIK	Q409	Q385	Confident	2	692.350	26.29	X
283	P02768	Serum albumin	VFDEFKPLVEEPQ[+314.1]NLIK	Q409	Q385	Confident	3	787.072	49.12	X
284	P02768	Serum albumin	QNC[+57]E[+313.1]LFEQLGEYK	E417	E393	Confident	2	985.940	37.2	X
285	P02768	Serum albumin	QNC[+57]ELFEQ[+314.1]LGEYK	Q421	Q397	Confident	2, 3	986.432, 657.957	81.17*, 32.93	X	X*
286	P02768	Serum albumin	K[+383.2]FQNALLVR	K426	K402	Ambiguous	2	736.414	35.25	X
287	P02768	Serum albumin	FQ[+314.1]NALLVR	Q428	Q404	Ambiguous	2	637.837	52.2	X
288	P02768	Serum albumin	KFQ[+314.1]NALLVR	Q428	Q404	Confident	2, 3	701.885, 468.259	36.62, 42.73	X
289	P02768	Serum albumin	FQNAL[+313.1]LVR	L431	L407	Confident	2	637.327	73.01#			X#
290	P02768	Serum albumin	FQNAL[+327.1]LVR	L431	L407	Confident	2	644.335	72.66#			X#
291	P02768	Serum albumin	FQNALL[+313.1]VR	L432	L408	Confident	2	637.327	77.76#			X#
292	P02768	Serum albumin	FQNALL[+327.1]VR	L432	L408	Confident	2	644.335	67.20#			X#
293	P02768	Serum albumin	K[+327.1]VPQVSTPTLVEVSR	K438	K414	Ambiguous	3	656.351	87.60#			X#
294	P02768	Serum albumin	KV[+327.1]PQVSTPTLVEVSR	V439	V415	Confident	3	656.351	91.03#			X#
295	P02768	Serum albumin	VP[+329.1]QVSTPTLVEVSR	P440	P416	Confident	2	920.983	78.57#		X#	X#
296	P02768	Serum albumin	KVPQ[+314.1]VSTPTL	Q441	Q417	Confident	2	692.369	43.49	X
297	P02768	Serum albumin	KVPQ[+314.1]VSTPTLVEVSR	Q441	Q417	Confident	2, 3	977.525, 652.019	85.01, 87.2	X
298	P02768	Serum albumin	VPQ[+314.1]VSTPTLVEVSR	Q441	Q417	Confident	2, 3	913.477, 609.321	70.57, 70.24	X
299	P02768	Serum albumin	KVPQVST[+311.1]PTLVEVSR	T444	T420	Confident	3	651.019	93.13#		X#	X#
300	P02768	Serum albumin	VPQVST[+311.1]PTLVEVSR	T444	T420	Confident	3	608.321	75.34#			X#
301	P02768	Serum albumin	KVPQVSTP[+329.1]TLVEVSR	P445	P421	Confident	3	657.023	83.85#			X#
302	P02768	Serum albumin	KVPQVSTPT[+311.1]LVEVSR	T446	T422	Confident	3	651.019	91.15#		X#	X#
303	P02768	Serum albumin	VPQVSTPT[+311.1]LVEVSR	T446	T422	Confident	2	911.978	59.87#		X#
304	P02768	Serum albumin	KVPQVSTPTL[+313.1]VEVSR	L447	L423	Confident	3	651.679	89.73#			X#
305	P02768	Serum albumin	KVPQVSTPTL[+327.1]VEVSR	L447	L423	Confident	3	656.351	82.63#			X#
306	P02768	Serum albumin	KVPQVSTPTLVE[+313.1]VSR	E449	E425	Confident	3	651.691	74.65	X
307	P02768	Serum albumin	NLGK[+298.1]VGSK	K456	K432	Confident	2	550.779	53.66#			X#
308	P02768	Serum albumin	NLGK[+312.1]VGSK	K456	K432	Confident	2	557.787	28.28*	X	X*	X*
309	P02768	Serum albumin	NLGK[+355.1]VGSK	K456	K432	Confident	2	579.308	27.75	X
310	P02768	Serum albumin	VGSK[+312.1]C[+57]C[+57]K	K460	K436	Confident	2	575.744	27.78	X
311	P02768	Serum albumin	VGSK[+383.2]C[+57]C[+57]K	K460	K436	Ambiguous	2	611.280	28.78	X
312	P02768	Serum albumin	C[+57]C[+57]K[+312.1]HPEAK	K463	K439	Confident	3	447.855	38.29	X
313	P02768	Serum albumin	RMPC[+57]AED[+313.1]	D475	D451	Confident	2	596.239	29.56	X
314	P02768	Serum albumin	N[+314.1]QLC[+57]VLHEK	N482	N458	Ambiguous	2, 3	727.848, 485.567	50.46, 27.89	X
315	P02768	Serum albumin	C[+57]VLHEK[+298.1]TPVSDR	K490	K466	Ambiguous	3	580.272	47.58#			X#
316	P02768	Serum albumin	C[+57]VLHEK[+312.1]TPVSDR	K490	K466	Confident	3	584.943	59.89#		X#	X#
317	P02768	Serum albumin	EK[+312.1]TPVSDR	K490	K466	Ambiguous	2	622.290	59.35#		X#	X#
318	P02768	Serum albumin	K[+312.1]TPVSDR	K490	K466	Confident	2	557.769	34.85#			X#
319	P02768	Serum albumin	VLHEK[+312.1]TPVSDR	K490	K466	Ambiguous	3	531.600	58.54#		X#	X#
320	P02768	Serum albumin	TPVSDR[+270.1]VTK	R496	R472	Confident	2	636.816	33.51*	X	X*	X*
321	P02768	Serum albumin	VTK[+298.1]C[+57]C[+57]TESLVNR	K499	K475	Confident	2, 3	882.895, 588.932	92.47#, 77.42#		X#	X#
322	P02768	Serum albumin	VTK[+312.1]C[+57]C[+57]TESLVNR	K499	K475	Confident	2, 3	889.903, 593.604	98.37#, 87.58#		X#	X#
323	P02768	Serum albumin	VTK[+327.1]C[+57]C[+57]TESLVNR	K499	K475	Ambiguous	3	598.608	85.36#		X#	X#
324	P02768	Serum albumin	C[+57]C[+397.2]TESLVNR	C501	C477	Ambiguous	3	493.556	61.33#		X#	X#
325	P02768	Serum albumin	C[+57]C[+57]T[+311.1]ESLVNR	T502	T478	Confident	2	725.305	104.01#		X#	X#
326	P02768	Serum albumin	C[+57]C[+57]TESL[+313.1]VNR	L505	L481	Confident	2	726.295	92.57#			X#
327	P02768	Serum albumin	C[+57]C[+57]TESL[+327.1]VNR	L505	L481	Confident	2	733.303	98.93#		X#	X#
328	P02768	Serum albumin	C[+57]C[+57]TESLVN[+314.1]R	N507	N483	Confident	2	726.805	83.21	X
329	P02768	Serum albumin	RPC[+57]FSALEVD[+313.1]	D518	D494	Confident	2	753.845	43.47	X
330	P02768	Serum albumin	RPC[+57]FSALEVDE[+313.1]TYVPK	E519	E495	Confident	3	742.022	57.18	X
331	P02768	Serum albumin	RPC[+57]FSALEVDETYVP[+329.1]K	P523	P499	Confident	3	747.354	65.53#		X#
332	P02768	Serum albumin	TFHADIC[+57]TLSEK[+312.1]ER	K543	K519	Confident	3	673.64	45.63	X
333	P02768	Serum albumin	QIK[+327.1]KQTALVELVK	K548	K524	Ambiguous	2	913.022	54.97#		X#
334	P02768	Serum albumin	K[+312.1]QTALVELVK	K549	K525	Confident	2	720.898	70.86	X
335	P02768	Serum albumin	K[+355.1]QTALVELVK	K549	K525	Confident	2, 3	742.419, 495.282	74.76, 69.35	X
336	P02768	Serum albumin	K[+367.1]QTALVELVK	K549	K525	Ambiguous	3	499.282	71.39	X
337	P02768	Serum albumin	K[+383.2]QTALVELVK	K549	K525	Ambiguous	2	756.434	64.67	X
338	P02768	Serum albumin	K[+385.1]QTALVELVK	K549	K525	Confident	2, 3	757.424, 505.285	73.52, 76.69	X
339	P02768	Serum albumin	K[+475.2]QTALVELVK	K549	K525	Confident	2, 3	802.440, 535.296	59.62, 73.88	X	X
340	P02768	Serum albumin	KQ[+314.1]TALVELVK	Q550	Q526	Confident	2, 3	721.905, 481.606	71.24, 63.08	X
341	P02768	Serum albumin	Q[+314.1]TALVELVK	Q550	Q526	Confident	2	657.858	21.60	X
342	P02768	Serum albumin	QT[+311.1]ALVELVK	T551	T527	Confident	2	656.358	58.49#		X#
343	P02768	Serum albumin	QTAL[+313.1]VELVK	L553	L529	Ambiguous	2	657.348	61.63#			X#
344	P02768	Serum albumin	QTALVE[+283.1]LVK	E555	E531	Ambiguous	2	642.361	67.61#			X#
345	P02768	Serum albumin	QTALVE[+313.1]LVK	E555	E531	Confident	2	657.366	66.26	X
346	P02768	Serum albumin	QTALVEL[+313.1]VK	L556	L532	Ambiguous	2	657.348	72.64#			X#
347	P02768	Serum albumin	KQTALVELVK[+312.1]HKPK	K558	K534	Confident	4	483.528	62.57#		X#	X#
348	P02768	Serum albumin	QTALVELVK[+298.1]HKPK	K558	K534	Confident	3, 4	596.998, 448	44.21#, 80.61#			X#
349	P02768	Serum albumin	QTALVELVK[+312.1]HK	K558	K534	Confident	2, 3	789.427, 526.62	55.47#, 50.21#		X#	X#
350	P02768	Serum albumin	QTALVELVK[+312.1]HKPK	K558	K534	Confident	3, 4	601.67, 451.504	68.80#, 70.87#		X#	X#
351	P02768	Serum albumin	QTALVELVKHK[+327.1]PK	K560	K536	Confident	3	606.673	45.65#			X#
352	P02768	Serum albumin	ATK[+312.1]EQLK	K565	K541	Confident	2	565.287	30.78*	X	X*	X*
353	P02768	Serum albumin	ATK[+383.2]EQLK	K565	K541	Ambiguous	2	600.824	24.13	X
354	P02768	Serum albumin	AVM[+281.1]DDFAAFVEK	M572	M548	Ambiguous	2	812.377	59.72*	X	X*
355	P02768	Serum albumin	A[+312.1]DDKETC[+57]FAEEGKK	A585	A561	Ambiguous	3	647.277	66.04#			X#
356	P02768	Serum albumin	A[+327.1]DDKETC[+57]FAEEGKK	A585	A561	Ambiguous	4	489.462	57.52#			X#
357	P02768	Serum albumin	AD[+313.1]DKETC[+57]FAEEGKK	D586	D562	Ambiguous	4	485.967	38.63	X
358	P02768	Serum albumin	ADDK[+312.1]ETC[+57]FAEEGK	K588	K564	Confident	2	906.364	73.24#		X#	X#
359	P02768	Serum albumin	ADDK[+312.1]ETC[+57]FAEEGKK	K588	K564	Confident	3	647.277	72.21#		X#	X#
360	P02768	Serum albumin	ADDK[+327.1]ETC[+57]FAEEGK	K588	K564	Ambiguous	3	609.582	-		X#
361	P02768	Serum albumin	ADDK[+355.1]ETC[+57]FAEEGKK	K588	K564	Confident	4	496.47	51.47	X
362	P02768	Serum albumin	E[+283.1]TC[+57]FAEEGK	E589	E565	Ambiguous	2	677.282	89.67#			X#
363	P02768	Serum albumin	E[+283.1]TC[+57]FAEEGKK	E589	E565	Confident	3	494.555	86.61#		X#	X#
364	P02768	Serum albumin	ADDKET[+311.1]C[+57]FAEEGK	T590	T566	Confident	3	604.251	67.45#		X#
365	P02768	Serum albumin	ADDKET[+311.1]C[+57]FAEEGKK	T590	T566	Confident	4	485.463	67.36		X#
366	P02768	Serum albumin	ADDKET[+311.1]C[+57]FAEEGKK	T590	T566	Confident	4	485.463	73.37#		X#	X#
367	P02768	Serum albumin	ADDKETC[+57]FA[+327.1]EEGKK	A593	A569	Confident	4	489.462	71.31#			X#
368	P02768	Serum albumin	ADDKETC[+57]FAE[+283.1]EGK	E594	E570	Confident	3	594.919	62.38#		X#
369	P02768	Serum albumin	ADDKETC[+57]FAEEGK[+312.1]K	K597	K573	Confident	2, 3	970.412, 647.277	63.13#, 71.03#		X#	X#
370	P02768	Serum albumin	ADDKETC[+57]FAEEGK[+327.1]K	K597	K573	Confident	3	652.281	58.25#		X#	X#
371	P02768	Serum albumin	ETC[+57]FAEEGK[+312.1]K	K597	K573	Ambiguous	2	755.819	86.10#		X#	X#
372	P02768	Serum albumin	ADDKETC[+57]FAEEGKK[+327.1]	K598	K574	Confident	4	489.462	66.54#			X#
373	P02787	Serotransferrin	DSGFQ[+314.1]MNQLR	Q127	Q108	Confident	2	755.332	65.69	X
374	P02787	Serotransferrin	KDSGFQ[+314.1]MNQLR	Q127	Q108	Ambiguous	3	546.589	45.74	X
375	P02787	Serotransferrin	DSGFQMN[+314.1]QLR	N129	N110	Confident	2	755.332	44.34	X
376	P02787	Serotransferrin	DC[+57]HLAQ[+314.1]VPSHTVVAR	Q264	Q245	Confident	3	668.656	71.88	X
377	P02787	Serotransferrin	HQ[+314.1]TVPQNTGGK	Q555	Q536	Confident	3	494.237	59.73	X
378	P02787	Serotransferrin	HQTVPQNTGGKNPD[+313.1]	D567	D548	Confident	3	602.616	39.52	X
379	P02787	Serotransferrin	APN[+314.1]HAVVTR	N603	N584	Confident	3	426.884	45.37	X
380	P02790	Hemopexin	SGAQ[+314.1]ATWTELPWPHEK	Q390	Q367	Confident	3	718.002	40.37	X
381	P04196	Histidine-rich glycoprotein	GPGK[+312.1]GPRPF	K445	K427	Confident	2	612.801	9.90	X
382	P04196	Histidine-rich glycoprotein	RGPGK[+312.1]GPRPF	K445	K427	Confident	3	460.903	27.42	X
383	P0C0L4	Complement C4-A	TLEIPGNSD[+313.1]	D965	D946	Confident	2	629.79	35.58	X
	P0C0L5	Complement C4-B		D965	D946
384	P0C0L4	Complement C4-A	GC[+57]GEQ[+314.1]TMIY	Q1013	Q994	Confident	2	686.77	11.76	X
	P0C0L5	Complement C4-B		Q1013	Q994
385	P0DOX6	Immunoglobulin mu heavy chain	GE[+313.1]PLSPEK	E493	E493	Ambiguous	2	585.285	9.54	X
386	P0DOX7	Immunoglobulin kappa light chain	VDNALQ[+314.1]SGNSQESVTEQDSK	Q155	Q155	Confident	2, 3	1225.54, 817.363	56.95, 52.23	X
	P01834	Immunoglobulin kappa constant		Q48	Q48
387	P0DOX7	Immunoglobulin kappa light chain	VDNALQSGN[+314.1]SQESVTEQDSK	N158	N158	Confident	2, 3	1225.54, 817.363	24.5, 40.72	X
	P01834	Immunoglobulin kappa constant		Q51	Q51
388	P0DOX7	Immunoglobulin kappa light chain	VDNALQSGNSQ[+314.1]ESVTEQDSK	Q160	Q160	Confident	2, 3	1225.54, 817.363	29.84, 32.50	X
	P01834	Immunoglobulin kappa constant		Q63	Q63
389	P0DOX7	Immunoglobulin kappa light chain	VDNALQSGNSQESVTEQD[+313.1]	D167	D167	Confident	2	1117.48	81.60	X
	P01834	Immunoglobulin kappa constant		D60	D60
390	P0DOX7	Immunoglobulin kappa light chain	AC[+57]EVTHQ[+314.1]GLSSPVTK	Q199	Q199	Ambiguous	3	643.305	9.94	X
	P01834	Immunoglobulin kappa constant		Q92	Q92
391	P0DOX7	Immunoglobulin kappa light chain	VYAC[+57]EVTHQ[+314.1]GLSSPVTK	Q199	Q199	Confident	2, 3	1095.52, 730.682	42.22, 74.67	X
	P01834	Immunoglobulin kappa constant		Q92	Q92
392	P0DOX8	Immunoglobulin lambda-1 light chain	ATLVC[+57]LISD[+313.1]	D142	D142	Confident	2	652.82	36.46	X
	P0DOY2	Immunoglobulin lambda constant 2		D32	D32
	P0DOY3	Immunoglobulin lambda constant 3		D32	D32
	B9A064	Immunoglobulin lambda-like polypeptide 5		D140	D105
393	P0DOX8	Immunoglobulin lambda-1 light chain	P[+329.1]VKAGVETTKPSK	P158	P158	Confident	3	557.635	34.55	X
	B9A064	Immunoglobulin lambda-like polypeptide 5		P156	P121
394	P0DOX8	Immunoglobulin lambda-1 light chain	ADGSPVK[+312.1]AGVETTKPSK	K160	K160	Confident	2, 3	992.494, 661.998	50.65, 70.86	X
	B9A064	Immunoglobulin lambda-like polypeptide 5		K158	K123
395	P0DOX8	Immunoglobulin lambda-1 light chain	LSLTPEQ[+314.1]WK	Q188	Q188	Confident	2	708.353	33.24	X
	P0DOY2	Immunoglobulin lambda constant 2		Q78	Q78
	P0DOY3	Immunoglobulin lambda constant 3		Q78	Q78
	B9A064	Immunoglobulin lambda-like polypeptide 5		Q186	Q151
396	P0DOX8	Immunoglobulin lambda-1 light chain	SYSC[+57]Q[+314.1]VTHEGSTVEK	Q198	Q198	Confident	2, 3	1013.436, 675.96	64.37, 12.89	X
	P0DOY2	Immunoglobulin lambda constant 2		Q88	Q88
	P0DOY3	Immunoglobulin lambda constant 3		Q88	Q88
	B9A064	Immunoglobulin lambda-like polypeptide 5		Q196	Q161
397	P0DOY2	Immunoglobulin lambda constant 2	ADSSPVK[+312.1]AGVETTTPSK	K50	K50	Confident	2, 3	993.975, 662.986	72.07, 46.74	X	X
	P0DOY3	Immunoglobulin lambda constant 3		K50	K50
398	P0DOY2	Immunoglobulin lambda constant 2	AGVE[+313.1]TTTPSK	E54	E54	Confident	2	652.319	27.71	X
	P0DOY3	Immunoglobulin lambda constant 3		E54	E54
399	P19823	Inter-alpha-trypsin inhibitor heavy chain H2	MLADAPPQD[+313.1]	D647	D593	Confident	2	635.781	16.00	X
400	P33032	Melanocortin receptor 5	ASSAR[+367.1]QR	R229	R229	Ambiguous	2	571.778	-	X
401	P34810	Macrosialin	ALVLI[+327.1]AF	I339	I318	Confident	2	537.294	39.07#		X#
402	Q14624	Inter-alpha-trypsin inhibitor heavy chain H4	TGLLLLSD[+313.1]	D839	D818	Confident	2	572.805	23.65	X
403	Q66K66	Transmembrane protein 198	MPGTVAT[+311.1]LR	T7	T7	Confident	2	628.816	13.15*	X	X*
404	Q8N271	Prominin-2	DDP[+329.1]SHPEAK	P460	P434	Ambiguous	2	662.783	9.46	X
X: indicates if the peptide was observed in the marked data set
§ PEAKS -10lgP score: is defined as “-10*log10(P-value)” where “for a given score x, its equivalent P-value is the probability that a false identification has score lager than x”. The table results are centered on the ARP-Plasma UpScale identifications so the written -10lgP score is for the best PSM in this data set. If peptide was not present in ARP-Plasma UpScale data set then the best PSM from…
# Indicates the peptide was not identified in ARP-Plasma UpScale data set and could only be identified in the data sets marked with X#
* Indicates that although identified in the ARP-Plasma UpScale data set, a better score was identified in datasets with X*
$ Modification sites of "canonical" protein corresponds to the canonical protein isoforms included in the Swissprot protein database used for identification. Modification sites of "mature" protein corresponds to protein sequences missing their respectivs signalling and propeptides (when relevant) as reported in UniProt (www.uniprot.org) and neXtProt (www.nextprot.org)repositories.

## Sheet: Table S4
USI*	Sample Set
mzspec:PXD023738:S4_19_48_43.mzXML:scan:4026:VHTEC[+57.0215]C[+57.0215]HGDLLEC[+57.0215]ADDR/2	ARP-Plasma:ARP-OxHSA
mzspec:PXD023738:S4_19_48_44.mzXML:scan:4047:VHTEC[+57.0215]C[+57.0215]HGDLLEC[+57.0215]ADDR/2	ARP-Plasma:ARP-OxHSA
mzspec:PXD023738:S4_19_48_45.mzXML:scan:4062:VHTEC[+57.0215]C[+57.0215]HGDLLEC[+57.0215]ADDR/2	ARP-Plasma:ARP-OxHSA
mzspec:PXD023738:S4_19_48_43.mzXML:scan:4000:VHTEC[+57.0215]C[+57.0215]HGDLLEC[+57.0215]ADDR/3	ARP-Plasma:ARP-OxHSA
mzspec:PXD023738:S4_19_48_42.mzXML:scan:4096:VHTEC[+57.0215]C[+57.0215]HGDLLEC[+57.0215]ADDR/2	ARP-Plasma:ARP-OxHSA
mzspec:PXD023738:S4_19_48_40.mzXML:scan:4230:VHTEC[+57.0215]C[+57.0215]HGDLLEC[+57.0215]ADDR/2	ARP-Plasma:ARP-OxHSA
mzspec:PXD023738:S4_19_48_40.mzXML:scan:4219:VHTEC[+57.0215]C[+57.0215]HGDLLEC[+57.0215]ADDR/3	ARP-Plasma:ARP-OxHSA
mzspec:PXD023738:S4_19_48_41.mzXML:scan:4097:VHTEC[+57.0215]C[+57.0215]HGDLLEC[+57.0215]ADDR/2	ARP-Plasma:ARP-OxHSA
mzspec:PXD023738:S4_19_48_42.mzXML:scan:4089:VHTEC[+57.0215]C[+57.0215]HGDLLEC[+57.0215]ADDR/3	ARP-Plasma:ARP-OxHSA
mzspec:PXD023738:S4_19_48_45.mzXML:scan:4074:VHTEC[+57.0215]C[+57.0215]HGDLLEC[+57.0215]ADDR/3	ARP-Plasma:ARP-OxHSA
mzspec:PXD023738:S4_19_48_44.mzXML:scan:4059:VHTEC[+57.0215]C[+57.0215]HGDLLEC[+57.0215]ADDR/3	ARP-Plasma:ARP-OxHSA
mzspec:PXD023738:S4_19_48_41.mzXML:scan:4102:VHTEC[+57.0215]C[+57.0215]HGDLLEC[+57.0215]ADDR/3	ARP-Plasma:ARP-OxHSA
mzspec:PXD023738:S4_19_48_44.mzXML:scan:4041:VHTEC[+57.0215]C[+57.0215]HGDLLEC[+57.0215]ADDR/3	ARP-Plasma:ARP-OxHSA
mzspec:PXD023738:S4_19_48_43.mzXML:scan:4019:VHTEC[+57.0215]C[+57.0215]HGDLLEC[+57.0215]ADDR/4	ARP-Plasma:ARP-OxHSA
mzspec:PXD023738:S4_19_48_45.mzXML:scan:4106:VHTEC[+57.0215]C[+57.0215]HGDLLEC[+57.0215]ADDR/4	ARP-Plasma:ARP-OxHSA
mzspec:PXD023738:S4_19_48_46.mzXML:scan:3409:VHTEC[+57.0215]C[+57.0215]HGDLLEC[+57.0215]ADDR/3	ARP-Plasma:ARP-OxHSA
mzspec:PXD023738:S4_19_48_45.mzXML:scan:4051:VHTEC[+57.0215]C[+57.0215]HGDLLEC[+57.0215]ADDR/4	ARP-Plasma:ARP-OxHSA
mzspec:PXD023738:S4_19_48_40.mzXML:scan:4218:VHTEC[+57.0215]C[+57.0215]HGDLLEC[+57.0215]ADDR/4	ARP-Plasma:ARP-OxHSA
mzspec:PXD023738:S4_19_48_47.mzXML:scan:3352:VHTEC[+57.0215]C[+57.0215]HGDLLEC[+57.0215]ADDR/3	ARP-Plasma:ARP-OxHSA
mzspec:PXD023738:S4_19_48_43.mzXML:scan:4004:VHTEC[+57.0215]C[+57.0215]HGDLLEC[+57.0215]ADDR/4	ARP-Plasma:ARP-OxHSA
mzspec:PXD023738:S4_19_48_45.mzXML:scan:339:VHTEC[+57.0215]C[+57.0215]HGDLLEC[+57.0215]ADDR/3	ARP-Plasma:ARP-OxHSA
mzspec:PXD023738:S4_19_48_40.mzXML:scan:4274:VHTEC[+57.0215]C[+57.0215]HGDLLEC[+57.0215]ADDR/4	ARP-Plasma:ARP-OxHSA
mzspec:PXD023738:S4_19_48_44.mzXML:scan:328:VHTEC[+57.0215]C[+57.0215]HGDLLEC[+57.0215]ADDR/3	ARP-Plasma:ARP-OxHSA
mzspec:PXD023738:S4_19_48_45.mzXML:scan:4068:VHTEC[+57.0215]C[+57.0215]HGDLLEC[+57.0215]ADDR/4	ARP-Plasma:ARP-OxHSA
mzspec:PXD023738:S4_19_48_44.mzXML:scan:4060:VHTEC[+57.0215]C[+57.0215]HGDLLEC[+57.0215]ADDR/4	ARP-Plasma:ARP-OxHSA
mzspec:PXD023738:S4_19_48_44.mzXML:scan:4078:VHTEC[+57.0215]C[+57.0215]HGDLLEC[+57.0215]ADDR/4	ARP-Plasma:ARP-OxHSA
mzspec:PXD023738:S4_19_48_42.mzXML:scan:4108:VHTEC[+57.0215]C[+57.0215]HGDLLEC[+57.0215]ADDR/4	ARP-Plasma:ARP-OxHSA
mzspec:PXD023738:S4_19_48_48.mzXML:scan:3434:VHTEC[+57.0215]C[+57.0215]HGDLLEC[+57.0215]ADDR/3	ARP-Plasma:ARP-OxHSA
mzspec:PXD023738:S4_19_48_46.mzXML:scan:3416:VHTEC[+57.0215]C[+57.0215]HGDLLEC[+57.0215]ADDR/4	ARP-Plasma:ARP-OxHSA
mzspec:PXD023738:S4_19_48_43.mzXML:scan:9595:VHTEC[+57.0215]C[+57.0215]HGDLLEC[+57.0215]ADDR/3	ARP-Plasma:ARP-OxHSA
mzspec:PXD023738:S4_19_48_42.mzXML:scan:4090:VHTEC[+57.0215]C[+57.0215]HGDLLEC[+57.0215]ADDR/4	ARP-Plasma:ARP-OxHSA
mzspec:PXD023738:S4_19_48_50.mzXML:scan:3551:VHTEC[+57.0215]C[+57.0215]HGDLLEC[+57.0215]ADDR/3	ARP-Plasma:ARP-OxHSA
mzspec:PXD023738:S4_19_48_49.mzXML:scan:3494:VHTEC[+57.0215]C[+57.0215]HGDLLEC[+57.0215]ADDR/4	ARP-Plasma:ARP-OxHSA
mzspec:PXD023738:S4_19_48_40.mzXML:scan:4312:VHTEC[+57.0215]C[+57.0215]HGDLLEC[+57.0215]ADDR/3	ARP-Plasma:ARP-OxHSA
mzspec:PXD023738:S4_19_48_41.mzXML:scan:4103:VHTEC[+57.0215]C[+57.0215]HGDLLEC[+57.0215]ADDR/4	ARP-Plasma:ARP-OxHSA
mzspec:PXD023738:S4_19_48_46.mzXML:scan:332:VHTEC[+57.0215]C[+57.0215]HGDLLEC[+57.0215]ADDR/4	ARP-Plasma:ARP-OxHSA
mzspec:PXD023738:S4_19_48_49.mzXML:scan:3485:VHTEC[+57.0215]C[+57.0215]HGDLLEC[+57.0215]ADDR/3	ARP-Plasma:ARP-OxHSA
mzspec:PXD023738:S4_19_48_47.mzXML:scan:3360:VHTEC[+57.0215]C[+57.0215]HGDLLEC[+57.0215]ADDR/4	ARP-Plasma:ARP-OxHSA
mzspec:PXD023738:S4_19_48_46.mzXML:scan:3400:VHTEC[+57.0215]C[+57.0215]HGDLLEC[+57.0215]ADDR/4	ARP-Plasma:ARP-OxHSA
mzspec:PXD023738:S4_19_48_48.mzXML:scan:3425:VHTEC[+57.0215]C[+57.0215]HGDLLEC[+57.0215]ADDR/4	ARP-Plasma:ARP-OxHSA
mzspec:PXD023738:S4_19_48_40.mzXML:scan:4330:VHTEC[+57.0215]C[+57.0215]HGDLLEC[+57.0215]ADDR/3	ARP-Plasma:ARP-OxHSA
mzspec:PXD023738:S4_19_48_50.mzXML:scan:3552:VHTEC[+57.0215]C[+57.0215]HGDLLEC[+57.0215]ADDR/4	ARP-Plasma:ARP-OxHSA
mzspec:PXD023738:S4_19_48_44.mzXML:scan:9593:VHTEC[+57.0215]C[+57.0215]HGDLLEC[+57.0215]ADDR/3	ARP-Plasma:ARP-OxHSA
mzspec:PXD023738:S4_19_48_43.mzXML:scan:333:VHTEC[+57.0215]C[+57.0215]HGDLLEC[+57.0215]ADDR/3	ARP-Plasma:ARP-OxHSA
mzspec:PXD023738:S4_19_48_45.mzXML:scan:6509:VHTEC[+57.0215]C[+57.0215]HGDLLEC[+57.0215]ADDR/3	ARP-Plasma:ARP-OxHSA
mzspec:PXD023738:S4_19_48_43.mzXML:scan:8852:VHTEC[+57.0215]C[+57.0215]HGDLLEC[+57.0215]ADDR/3	ARP-Plasma:ARP-OxHSA
mzspec:PXD023738:S4_19_48_44.mzXML:scan:8111:VHTEC[+57.0215]C[+57.0215]HGDLLEC[+57.0215]ADDR/3	ARP-Plasma:ARP-OxHSA
mzspec:PXD023738:S4_19_48_44.mzXML:scan:6877:VHTEC[+57.0215]C[+57.0215]HGDLLEC[+57.0215]ADDR/3	ARP-Plasma:ARP-OxHSA
mzspec:PXD023738:S4_19_48_43.mzXML:scan:6441:VHTEC[+57.0215]C[+57.0215]HGDLLEC[+57.0215]ADDR/3	ARP-Plasma:ARP-OxHSA
mzspec:PXD023738:S4_19_48_45.mzXML:scan:6198:VHTEC[+57.0215]C[+57.0215]HGDLLEC[+57.0215]ADDR/3	ARP-Plasma:ARP-OxHSA
mzspec:PXD023738:S4_19_48_45.mzXML:scan:8073:VHTEC[+57.0215]C[+57.0215]HGDLLEC[+57.0215]ADDR/3	ARP-Plasma:ARP-OxHSA
mzspec:PXD023738:S4_19_48_43.mzXML:scan:6552:VHTEC[+57.0215]C[+57.0215]HGDLLEC[+57.0215]ADDR/3	ARP-Plasma:ARP-OxHSA
mzspec:PXD023738:S4_19_48_43.mzXML:scan:6252:VHTEC[+57.0215]C[+57.0215]HGDLLEC[+57.0215]ADDR/3	ARP-Plasma:ARP-OxHSA
mzspec:PXD023738:S4_19_48_44.mzXML:scan:8932:VHTEC[+57.0215]C[+57.0215]HGDLLEC[+57.0215]ADDR/3	ARP-Plasma:ARP-OxHSA
mzspec:PXD023738:S4_19_48_44.mzXML:scan:7346:VHTEC[+57.0215]C[+57.0215]HGDLLEC[+57.0215]ADDR/3	ARP-Plasma:ARP-OxHSA
mzspec:PXD023738:S4_19_48_44.mzXML:scan:6121:VHTEC[+57.0215]C[+57.0215]HGDLLEC[+57.0215]ADDR/3	ARP-Plasma:ARP-OxHSA
mzspec:PXD023738:S4_19_48_47.mzXML:scan:318:VHTEC[+57.0215]C[+57.0215]HGDLLEC[+57.0215]ADDR/3	ARP-Plasma:ARP-OxHSA
mzspec:PXD023738:S4_19_48_42.mzXML:scan:331:VHTEC[+57.0215]C[+57.0215]HGDLLEC[+57.0215]ADDR/3	ARP-Plasma:ARP-OxHSA
mzspec:PXD023738:S4_19_48_42.mzXML:scan:9747:VHTEC[+57.0215]C[+57.0215]HGDLLEC[+57.0215]ADDR/3	ARP-Plasma:ARP-OxHSA
mzspec:PXD023738:S4_19_48_45.mzXML:scan:8235:VHTEC[+57.0215]C[+57.0215]HGDLLEC[+57.0215]ADDR/3	ARP-Plasma:ARP-OxHSA
mzspec:PXD023738:S4_19_48_42.mzXML:scan:7170:VHTEC[+57.0215]C[+57.0215]HGDLLEC[+57.0215]ADDR/3	ARP-Plasma:ARP-OxHSA
mzspec:PXD023738:S4_19_48_45.mzXML:scan:8550:VHTEC[+57.0215]C[+57.0215]HGDLLEC[+57.0215]ADDR/3	ARP-Plasma:ARP-OxHSA
mzspec:PXD023738:S4_19_48_45.mzXML:scan:9626:VHTEC[+57.0215]C[+57.0215]HGDLLEC[+57.0215]ADDR/3	ARP-Plasma:ARP-OxHSA
mzspec:PXD023738:S4_19_48_45.mzXML:scan:7936:VHTEC[+57.0215]C[+57.0215]HGDLLEC[+57.0215]ADDR/3	ARP-Plasma:ARP-OxHSA
mzspec:PXD023738:S4_19_48_45.mzXML:scan:8992:VHTEC[+57.0215]C[+57.0215]HGDLLEC[+57.0215]ADDR/3	ARP-Plasma:ARP-OxHSA
mzspec:PXD023738:S4_19_48_44.mzXML:scan:7010:VHTEC[+57.0215]C[+57.0215]HGDLLEC[+57.0215]ADDR/3	ARP-Plasma:ARP-OxHSA
mzspec:PXD023738:S4_19_48_43.mzXML:scan:3754:YIC[+57.0215]ENQDSISSK/2	ARP-Plasma:ARP-OxHSA
mzspec:PXD023738:S4_19_48_43.mzXML:scan:3622:YIC[+57.0215]ENQDSISSK/2	ARP-Plasma:ARP-OxHSA
mzspec:PXD023738:S4_19_48_43.mzXML:scan:3448:YIC[+57.0215]ENQDSISSK/2	ARP-Plasma:ARP-OxHSA
mzspec:PXD023738:S4_19_48_45.mzXML:scan:3804:YIC[+57.0215]ENQDSISSK/2	ARP-Plasma:ARP-OxHSA
mzspec:PXD023738:S4_19_48_45.mzXML:scan:3516:YIC[+57.0215]ENQDSISSK/2	ARP-Plasma:ARP-OxHSA
mzspec:PXD023738:S4_19_48_40.mzXML:scan:3800:YIC[+57.0215]ENQDSISSK/2	ARP-Plasma:ARP-OxHSA
mzspec:PXD023738:S4_19_48_40.mzXML:scan:3900:YIC[+57.0215]ENQDSISSK/2	ARP-Plasma:ARP-OxHSA
mzspec:PXD023738:S4_19_48_45.mzXML:scan:335:YIC[+57.0215]ENQDSISSK/2	ARP-Plasma:ARP-OxHSA
mzspec:PXD023738:S4_19_48_44.mzXML:scan:326:YIC[+57.0215]ENQDSISSK/2	ARP-Plasma:ARP-OxHSA
mzspec:PXD023738:S4_19_48_42.mzXML:scan:3705:YIC[+57.0215]ENQDSISSK/2	ARP-Plasma:ARP-OxHSA
mzspec:PXD023738:S4_19_48_45.mzXML:scan:3672:YIC[+57.0215]ENQDSISSK/2	ARP-Plasma:ARP-OxHSA
mzspec:PXD023738:S4_19_48_43.mzXML:scan:3772:YIC[+57.0215]ENQDSISSK/2	ARP-Plasma:ARP-OxHSA
mzspec:PXD023738:S4_19_48_44.mzXML:scan:3513:YIC[+57.0215]ENQDSISSK/2	ARP-Plasma:ARP-OxHSA
mzspec:PXD023738:S4_19_48_43.mzXML:scan:325:YIC[+57.0215]ENQDSISSK/2	ARP-Plasma:ARP-OxHSA
mzspec:PXD023738:S4_19_48_41.mzXML:scan:3706:YIC[+57.0215]ENQDSISSK/2	ARP-Plasma:ARP-OxHSA
mzspec:PXD023738:S4_19_48_42.mzXML:scan:3536:YIC[+57.0215]ENQDSISSK/2	ARP-Plasma:ARP-OxHSA
mzspec:PXD023738:S4_19_48_47.mzXML:scan:2967:YIC[+57.0215]ENQDSISSK/2	ARP-Plasma:ARP-OxHSA
mzspec:PXD023738:S4_19_48_43.mzXML:scan:3557:YIC[+57.0215]ENQDSISSK/2	ARP-Plasma:ARP-OxHSA
mzspec:PXD023738:S4_19_48_42.mzXML:scan:323:YIC[+57.0215]ENQDSISSK/2	ARP-Plasma:ARP-OxHSA
mzspec:PXD023738:S4_19_48_41.mzXML:scan:3528:YIC[+57.0215]ENQDSISSK/2	ARP-Plasma:ARP-OxHSA
mzspec:PXD023738:S4_19_48_48.mzXML:scan:3038:YIC[+57.0215]ENQDSISSK/2	ARP-Plasma:ARP-OxHSA
mzspec:PXD023738:S4_19_48_47.mzXML:scan:313:YIC[+57.0215]ENQDSISSK/2	ARP-Plasma:ARP-OxHSA
mzspec:PXD023738:S4_19_48_45.mzXML:scan:3604:YIC[+57.0215]ENQDSISSK/2	ARP-Plasma:ARP-OxHSA
mzspec:PXD023738:S4_19_48_49.mzXML:scan:3104:YIC[+57.0215]ENQDSISSK/2	ARP-Plasma:ARP-OxHSA
mzspec:PXD023738:S4_19_48_46.mzXML:scan:3020:YIC[+57.0215]ENQDSISSK/2	ARP-Plasma:ARP-OxHSA
mzspec:PXD023738:S4_19_48_46.mzXML:scan:330:YIC[+57.0215]ENQDSISSK/2	ARP-Plasma:ARP-OxHSA
mzspec:PXD023738:S4_19_48_43.mzXML:scan:6555:YIC[+57.0215]ENQDSISSK/2	ARP-Plasma:ARP-OxHSA
mzspec:PXD023738:S4_19_48_50.mzXML:scan:3144:YIC[+57.0215]ENQDSISSK/2	ARP-Plasma:ARP-OxHSA
mzspec:PXD023738:S4_19_48_44.mzXML:scan:8997:YIC[+57.0215]ENQDSISSK/2	ARP-Plasma:ARP-OxHSA
mzspec:PXD023738:S4_19_48_41.mzXML:scan:325:YIC[+57.0215]ENQDSISSK/2	ARP-Plasma:ARP-OxHSA
mzspec:PXD023738:S4_19_48_43.mzXML:scan:6269:YIC[+57.0215]ENQDSISSK/2	ARP-Plasma:ARP-OxHSA
mzspec:PXD023738:S4_19_48_43.mzXML:scan:6591:YIC[+57.0215]ENQDSISSK/2	ARP-Plasma:ARP-OxHSA
mzspec:PXD023738:S4_19_48_45.mzXML:scan:9021:YIC[+57.0215]ENQDSISSK/2	ARP-Plasma:ARP-OxHSA
mzspec:PXD023738:S4_19_48_43.mzXML:scan:6634:YIC[+57.0215]ENQDSISSK/2	ARP-Plasma:ARP-OxHSA
mzspec:PXD023738:S4_19_48_42.mzXML:scan:3642:YIC[+57.0215]ENQDSISSK/2	ARP-Plasma:ARP-OxHSA
mzspec:PXD023738:S4_19_48_43.mzXML:scan:6574:YIC[+57.0215]ENQDSISSK/2	ARP-Plasma:ARP-OxHSA
mzspec:PXD023738:S4_19_48_43.mzXML:scan:7930:YIC[+57.0215]ENQDSISSK/2	ARP-Plasma:ARP-OxHSA
mzspec:PXD023738:S4_19_48_43.mzXML:scan:6427:YIC[+57.0215]ENQDSISSK/2	ARP-Plasma:ARP-OxHSA
mzspec:PXD023738:S4_19_48_43.mzXML:scan:6810:YIC[+57.0215]ENQDSISSK/2	ARP-Plasma:ARP-OxHSA
mzspec:PXD023738:S4_19_48_43.mzXML:scan:6782:YIC[+57.0215]ENQDSISSK/2	ARP-Plasma:ARP-OxHSA
mzspec:PXD023738:S4_19_48_45.mzXML:scan:7388:YIC[+57.0215]ENQDSISSK/2	ARP-Plasma:ARP-OxHSA
mzspec:PXD023738:S4_19_48_49.mzXML:scan:320:YIC[+57.0215]ENQDSISSK/2	ARP-Plasma:ARP-OxHSA
mzspec:PXD023738:S4_19_48_43.mzXML:scan:6500:YIC[+57.0215]ENQDSISSK/2	ARP-Plasma:ARP-OxHSA
mzspec:PXD023738:S4_19_48_43.mzXML:scan:10204:YIC[+57.0215]ENQDSISSK/2	ARP-Plasma:ARP-OxHSA
mzspec:PXD023738:S4_19_48_43.mzXML:scan:6942:YIC[+57.0215]ENQDSISSK/2	ARP-Plasma:ARP-OxHSA
mzspec:PXD023738:S4_19_48_43.mzXML:scan:6964:YIC[+57.0215]ENQDSISSK/2	ARP-Plasma:ARP-OxHSA
mzspec:PXD023738:S4_19_48_43.mzXML:scan:9020:YIC[+57.0215]ENQDSISSK/2	ARP-Plasma:ARP-OxHSA
mzspec:PXD023738:S4_19_48_43.mzXML:scan:6515:YIC[+57.0215]ENQDSISSK/2	ARP-Plasma:ARP-OxHSA
mzspec:PXD023738:S4_19_48_44.mzXML:scan:8595:YIC[+57.0215]ENQDSISSK/2	ARP-Plasma:ARP-OxHSA
mzspec:PXD023738:S4_19_48_45.mzXML:scan:8388:YIC[+57.0215]ENQDSISSK/2	ARP-Plasma:ARP-OxHSA
mzspec:PXD023738:S4_19_48_44.mzXML:scan:8169:YIC[+57.0215]ENQDSISSK/2	ARP-Plasma:ARP-OxHSA
mzspec:PXD023738:S4_19_48_44.mzXML:scan:10285:YIC[+57.0215]ENQDSISSK/2	ARP-Plasma:ARP-OxHSA
mzspec:PXD023738:S4_19_48_42.mzXML:scan:9171:YIC[+57.0215]ENQDSISSK/2	ARP-Plasma:ARP-OxHSA
mzspec:PXD023738:S4_19_48_43.mzXML:scan:6483:YIC[+57.0215]ENQDSISSK/2	ARP-Plasma:ARP-OxHSA
mzspec:PXD023738:S4_19_48_43.mzXML:scan:6598:YIC[+57.0215]ENQDSISSK/2	ARP-Plasma:ARP-OxHSA
mzspec:PXD023738:S4_19_48_45.mzXML:scan:7599:YIC[+57.0215]ENQDSISSK/2	ARP-Plasma:ARP-OxHSA
mzspec:PXD023738:S4_19_48_45.mzXML:scan:10297:YIC[+57.0215]ENQDSISSK/2	ARP-Plasma:ARP-OxHSA
mzspec:PXD023738:S4_19_48_44.mzXML:scan:8496:YIC[+57.0215]ENQDSISSK/2	ARP-Plasma:ARP-OxHSA
mzspec:PXD023738:S4_19_48_45.mzXML:scan:6296:YIC[+57.0215]ENQDSISSK/2	ARP-Plasma:ARP-OxHSA
mzspec:PXD023738:S4_19_48_44.mzXML:scan:6485:YIC[+57.0215]ENQDSISSK/2	ARP-Plasma:ARP-OxHSA
mzspec:PXD023738:S4_19_48_43.mzXML:scan:8083:YIC[+57.0215]ENQDSISSK/2	ARP-Plasma:ARP-OxHSA
mzspec:PXD023738:S4_19_48_43.mzXML:scan:7032:YIC[+57.0215]ENQDSISSK/2	ARP-Plasma:ARP-OxHSA
mzspec:PXD023738:S4_19_48_41.mzXML:scan:9212:YIC[+57.0215]ENQDSISSK/2	ARP-Plasma:ARP-OxHSA
mzspec:PXD023738:S4_19_48_40.mzXML:scan:8877:YIC[+57.0215]ENQDSISSK/2	ARP-Plasma:ARP-OxHSA
mzspec:PXD023738:S4_19_48_45.mzXML:scan:8594:YIC[+57.0215]ENQDSISSK/2	ARP-Plasma:ARP-OxHSA
mzspec:PXD023738:S4_19_48_48.mzXML:scan:314:YIC[+57.0215]ENQDSISSK/2	ARP-Plasma:ARP-OxHSA
mzspec:PXD023738:S4_19_48_43.mzXML:scan:7572:YIC[+57.0215]ENQDSISSK/2	ARP-Plasma:ARP-OxHSA
mzspec:PXD023738:S4_19_48_42.mzXML:scan:3622:YIC[+57.0215]ENQDSISSK/2	ARP-Plasma:ARP-OxHSA
mzspec:PXD023738:S4_19_48_45.mzXML:scan:7114:YIC[+57.0215]ENQDSISSK/2	ARP-Plasma:ARP-OxHSA
mzspec:PXD023738:S4_19_48_43.mzXML:scan:7409:YIC[+57.0215]ENQDSISSK/2	ARP-Plasma:ARP-OxHSA
mzspec:PXD023738:S4_19_48_45.mzXML:scan:8044:YIC[+57.0215]ENQDSISSK/2	ARP-Plasma:ARP-OxHSA
mzspec:PXD023738:S4_19_48_43.mzXML:scan:6771:YIC[+57.0215]ENQDSISSK/2	ARP-Plasma:ARP-OxHSA
mzspec:PXD023738:S4_19_48_43.mzXML:scan:7072:YIC[+57.0215]ENQDSISSK/2	ARP-Plasma:ARP-OxHSA
mzspec:PXD023738:S4_19_48_43.mzXML:scan:6894:YIC[+57.0215]ENQDSISSK/2	ARP-Plasma:ARP-OxHSA
mzspec:PXD023738:S4_19_48_40.mzXML:scan:6715:YIC[+57.0215]ENQDSISSK/2	ARP-Plasma:ARP-OxHSA
mzspec:PXD023738:S4_19_48_50.mzXML:scan:314:YIC[+57.0215]ENQDSISSK/2	ARP-Plasma:ARP-OxHSA
mzspec:PXD023738:S4_19_48_45.mzXML:scan:7969:YIC[+57.0215]ENQDSISSK/2	ARP-Plasma:ARP-OxHSA
mzspec:PXD023738:S4_19_48_43.mzXML:scan:6855:YIC[+57.0215]ENQDSISSK/2	ARP-Plasma:ARP-OxHSA
mzspec:PXD023738:S4_19_48_42.mzXML:scan:6384:YIC[+57.0215]ENQDSISSK/2	ARP-Plasma:ARP-OxHSA
mzspec:PXD023738:S4_19_48_44.mzXML:scan:7283:YIC[+57.0215]ENQDSISSK/2	ARP-Plasma:ARP-OxHSA
mzspec:PXD023738:S4_19_48_45.mzXML:scan:7379:YIC[+57.0215]ENQDSISSK/2	ARP-Plasma:ARP-OxHSA
mzspec:PXD023738:S4_19_48_45.mzXML:scan:7749:YIC[+57.0215]ENQDSISSK/2	ARP-Plasma:ARP-OxHSA
mzspec:PXD023738:S4_19_48_45.mzXML:scan:7657:YIC[+57.0215]ENQDSISSK/2	ARP-Plasma:ARP-OxHSA
mzspec:PXD023738:S4_19_48_43.mzXML:scan:6447:YIC[+57.0215]ENQDSISSK/2	ARP-Plasma:ARP-OxHSA
mzspec:PXD023738:S4_19_48_43.mzXML:scan:7180:YIC[+57.0215]ENQDSISSK/2	ARP-Plasma:ARP-OxHSA
mzspec:PXD023738:S4_19_48_45.mzXML:scan:7361:YIC[+57.0215]ENQDSISSK/2	ARP-Plasma:ARP-OxHSA
mzspec:PXD023738:S4_19_48_43.mzXML:scan:6869:YIC[+57.0215]ENQDSISSK/2	ARP-Plasma:ARP-OxHSA
mzspec:PXD023738:S4_19_48_45.mzXML:scan:8016:YIC[+57.0215]ENQDSISSK/2	ARP-Plasma:ARP-OxHSA
mzspec:PXD023738:S4_19_48_45.mzXML:scan:7854:YIC[+57.0215]ENQDSISSK/2	ARP-Plasma:ARP-OxHSA
mzspec:PXD023738:S4_19_48_43.mzXML:scan:6132:YIC[+57.0215]ENQDSISSK/2	ARP-Plasma:ARP-OxHSA
mzspec:PXD023738:S4_19_48_45.mzXML:scan:8609:YIC[+57.0215]ENQDSISSK/2	ARP-Plasma:ARP-OxHSA
mzspec:PXD023738:S4_19_48_43.mzXML:scan:6329:YIC[+57.0215]ENQDSISSK/2	ARP-Plasma:ARP-OxHSA
mzspec:PXD023738:S4_19_48_45.mzXML:scan:7217:YIC[+57.0215]ENQDSISSK/2	ARP-Plasma:ARP-OxHSA
mzspec:PXD023738:S4_19_48_45.mzXML:scan:8633:YIC[+57.0215]ENQDSISSK/2	ARP-Plasma:ARP-OxHSA
mzspec:PXD023738:S4_19_48_43.mzXML:scan:6150:YIC[+57.0215]ENQDSISSK/2	ARP-Plasma:ARP-OxHSA
mzspec:PXD023738:S4_19_48_43.mzXML:scan:7261:YIC[+57.0215]ENQDSISSK/2	ARP-Plasma:ARP-OxHSA
mzspec:PXD023738:S4_19_48_43.mzXML:scan:7000:YIC[+57.0215]ENQDSISSK/2	ARP-Plasma:ARP-OxHSA
mzspec:PXD023738:S4_19_48_43.mzXML:scan:7534:YIC[+57.0215]ENQDSISSK/2	ARP-Plasma:ARP-OxHSA
mzspec:PXD023738:S4_19_48_44.mzXML:scan:8465:YIC[+57.0215]ENQDSISSK/2	ARP-Plasma:ARP-OxHSA
mzspec:PXD023738:S4_19_48_44.mzXML:scan:8543:YIC[+57.0215]ENQDSISSK/2	ARP-Plasma:ARP-OxHSA
mzspec:PXD023738:S4_19_48_45.mzXML:scan:8406:YIC[+57.0215]ENQDSISSK/2	ARP-Plasma:ARP-OxHSA
mzspec:PXD023738:S4_19_48_45.mzXML:scan:8349:YIC[+57.0215]ENQDSISSK/2	ARP-Plasma:ARP-OxHSA
mzspec:PXD023738:S4_19_48_43.mzXML:scan:6789:YIC[+57.0215]ENQDSISSK/2	ARP-Plasma:ARP-OxHSA
mzspec:PXD023738:S4_19_48_44.mzXML:scan:8319:YIC[+57.0215]ENQDSISSK/2	ARP-Plasma:ARP-OxHSA
mzspec:PXD023738:S4_19_48_43.mzXML:scan:6715:YIC[+57.0215]ENQDSISSK/2	ARP-Plasma:ARP-OxHSA
mzspec:PXD023738:S4_19_48_45.mzXML:scan:7944:YIC[+57.0215]ENQDSISSK/2	ARP-Plasma:ARP-OxHSA
mzspec:PXD023738:S4_19_48_41.mzXML:scan:6175:YIC[+57.0215]ENQDSISSK/2	ARP-Plasma:ARP-OxHSA
mzspec:PXD023738:S4_19_48_43.mzXML:scan:6741:YIC[+57.0215]ENQDSISSK/2	ARP-Plasma:ARP-OxHSA
mzspec:PXD023738:S4_19_48_45.mzXML:scan:7145:YIC[+57.0215]ENQDSISSK/2	ARP-Plasma:ARP-OxHSA
mzspec:PXD023738:S4_19_48_43.mzXML:scan:6540:YIC[+57.0215]ENQDSISSK/2	ARP-Plasma:ARP-OxHSA
mzspec:PXD023738:S4_19_48_45.mzXML:scan:8111:YIC[+57.0215]ENQDSISSK/2	ARP-Plasma:ARP-OxHSA
mzspec:PXD023738:S4_19_48_44.mzXML:scan:8303:YIC[+57.0215]ENQDSISSK/2	ARP-Plasma:ARP-OxHSA
mzspec:PXD023738:S4_19_48_45.mzXML:scan:8224:YIC[+57.0215]ENQDSISSK/2	ARP-Plasma:ARP-OxHSA
mzspec:PXD023738:S4_19_48_45.mzXML:scan:7767:YIC[+57.0215]ENQDSISSK/2	ARP-Plasma:ARP-OxHSA
mzspec:PXD023738:S4_19_48_42.mzXML:scan:7867:YIC[+57.0215]ENQDSISSK/2	ARP-Plasma:ARP-OxHSA
mzspec:PXD023738:S4_19_48_44.mzXML:scan:8567:YIC[+57.0215]ENQDSISSK/2	ARP-Plasma:ARP-OxHSA
mzspec:PXD023738:S4_19_48_43.mzXML:scan:7829:YIC[+57.0215]ENQDSISSK/2	ARP-Plasma:ARP-OxHSA
mzspec:PXD023738:S4_19_48_43.mzXML:scan:7889:YIC[+57.0215]ENQDSISSK/2	ARP-Plasma:ARP-OxHSA
mzspec:PXD023738:S4_19_48_45.mzXML:scan:7531:YIC[+57.0215]ENQDSISSK/2	ARP-Plasma:ARP-OxHSA
mzspec:PXD023738:S4_19_48_45.mzXML:scan:8673:YIC[+57.0215]ENQDSISSK/2	ARP-Plasma:ARP-OxHSA
mzspec:PXD023738:S4_19_48_45.mzXML:scan:8064:YIC[+57.0215]ENQDSISSK/2	ARP-Plasma:ARP-OxHSA
mzspec:PXD023738:S4_19_48_40.mzXML:scan:7570:YIC[+57.0215]ENQDSISSK/2	ARP-Plasma:ARP-OxHSA
mzspec:PXD023738:S4_19_48_44.mzXML:scan:8427:YIC[+57.0215]ENQDSISSK/2	ARP-Plasma:ARP-OxHSA
mzspec:PXD023738:S4_19_48_43.mzXML:scan:6617:YIC[+57.0215]ENQDSISSK/2	ARP-Plasma:ARP-OxHSA
mzspec:PXD023738:S4_19_48_43.mzXML:scan:7593:YIC[+57.0215]ENQDSISSK/2	ARP-Plasma:ARP-OxHSA
mzspec:PXD023738:S4_19_48_45.mzXML:scan:8007:YIC[+57.0215]ENQDSISSK/2	ARP-Plasma:ARP-OxHSA
mzspec:PXD023738:S4_19_48_43.mzXML:scan:6344:YIC[+57.0215]ENQDSISSK/2	ARP-Plasma:ARP-OxHSA
mzspec:PXD023738:S4_19_48_43.mzXML:scan:6362:YIC[+57.0215]ENQDSISSK/2	ARP-Plasma:ARP-OxHSA
mzspec:PXD023738:S4_19_48_42.mzXML:scan:8496:YIC[+57.0215]ENQDSISSK/2	ARP-Plasma:ARP-OxHSA
mzspec:PXD023738:S4_19_48_42.mzXML:scan:7236:YIC[+57.0215]ENQDSISSK/2	ARP-Plasma:ARP-OxHSA
mzspec:PXD023738:S4_19_48_43.mzXML:scan:6290:YIC[+57.0215]ENQDSISSK/2	ARP-Plasma:ARP-OxHSA
mzspec:PXD023738:S4_19_48_44.mzXML:scan:8194:YIC[+57.0215]ENQDSISSK/2	ARP-Plasma:ARP-OxHSA
mzspec:PXD023738:S4_19_48_43.mzXML:scan:6752:YIC[+57.0215]ENQDSISSK/2	ARP-Plasma:ARP-OxHSA
mzspec:PXD023738:S4_19_48_43.mzXML:scan:7536:YIC[+57.0215]ENQDSISSK/2	ARP-Plasma:ARP-OxHSA
mzspec:PXD023738:S4_19_48_41.mzXML:scan:7988:YIC[+57.0215]ENQDSISSK/2	ARP-Plasma:ARP-OxHSA
mzspec:PXD023738:S4_19_48_45.mzXML:scan:7201:YIC[+57.0215]ENQDSISSK/2	ARP-Plasma:ARP-OxHSA
mzspec:PXD023738:S4_19_48_44.mzXML:scan:8323:YIC[+57.0215]ENQDSISSK/2	ARP-Plasma:ARP-OxHSA
mzspec:PXD023738:S4_19_48_45.mzXML:scan:7916:YIC[+57.0215]ENQDSISSK/2	ARP-Plasma:ARP-OxHSA
mzspec:PXD023738:S4_19_48_45.mzXML:scan:8181:YIC[+57.0215]ENQDSISSK/2	ARP-Plasma:ARP-OxHSA
mzspec:PXD023738:S4_19_48_43.mzXML:scan:6915:YIC[+57.0215]ENQDSISSK/2	ARP-Plasma:ARP-OxHSA
mzspec:PXD023738:S4_19_48_43.mzXML:scan:8111:YIC[+57.0215]ENQDSISSK/2	ARP-Plasma:ARP-OxHSA
mzspec:PXD023738:S4_19_48_45.mzXML:scan:8200:YIC[+57.0215]ENQDSISSK/2	ARP-Plasma:ARP-OxHSA
mzspec:PXD023738:S4_19_48_43.mzXML:scan:6104:YIC[+57.0215]ENQDSISSK/2	ARP-Plasma:ARP-OxHSA
mzspec:PXD023738:S4_19_48_44.mzXML:scan:8437:YIC[+57.0215]ENQDSISSK/2	ARP-Plasma:ARP-OxHSA
mzspec:PXD023738:S4_19_48_42.mzXML:scan:7215:YIC[+57.0215]ENQDSISSK/2	ARP-Plasma:ARP-OxHSA
mzspec:PXD023738:S4_19_48_42.mzXML:scan:8636:YIC[+57.0215]ENQDSISSK/2	ARP-Plasma:ARP-OxHSA
mzspec:PXD023738:S4_19_48_45.mzXML:scan:7571:YIC[+57.0215]ENQDSISSK/2	ARP-Plasma:ARP-OxHSA
mzspec:PXD023738:S4_19_48_42.mzXML:scan:8370:YIC[+57.0215]ENQDSISSK/2	ARP-Plasma:ARP-OxHSA
mzspec:PXD023738:S4_19_48_45.mzXML:scan:7454:YIC[+57.0215]ENQDSISSK/2	ARP-Plasma:ARP-OxHSA
mzspec:PXD023738:S4_19_48_45.mzXML:scan:7286:YIC[+57.0215]ENQDSISSK/2	ARP-Plasma:ARP-OxHSA
mzspec:PXD023738:S4_19_48_45.mzXML:scan:7083:YIC[+57.0215]ENQDSISSK/2	ARP-Plasma:ARP-OxHSA
mzspec:PXD023738:S4_19_48_45.mzXML:scan:7702:YIC[+57.0215]ENQDSISSK/2	ARP-Plasma:ARP-OxHSA
mzspec:PXD023738:S4_19_48_44.mzXML:scan:8525:YIC[+57.0215]ENQDSISSK/2	ARP-Plasma:ARP-OxHSA
mzspec:PXD023738:S4_19_48_43.mzXML:scan:6257:YIC[+57.0215]ENQDSISSK/2	ARP-Plasma:ARP-OxHSA
mzspec:PXD023738:S4_19_48_44.mzXML:scan:8358:YIC[+57.0215]ENQDSISSK/2	ARP-Plasma:ARP-OxHSA
mzspec:PXD023738:S4_19_48_44.mzXML:scan:8408:YIC[+57.0215]ENQDSISSK/2	ARP-Plasma:ARP-OxHSA
mzspec:PXD023738:S4_19_48_45.mzXML:scan:7406:YIC[+57.0215]ENQDSISSK/2	ARP-Plasma:ARP-OxHSA
mzspec:PXD023738:S4_19_48_43.mzXML:scan:6378:YIC[+57.0215]ENQDSISSK/2	ARP-Plasma:ARP-OxHSA
mzspec:PXD023738:S4_19_48_41.mzXML:scan:8552:YIC[+57.0215]ENQDSISSK/2	ARP-Plasma:ARP-OxHSA
mzspec:PXD023738:S4_19_48_44.mzXML:scan:8224:YIC[+57.0215]ENQDSISSK/2	ARP-Plasma:ARP-OxHSA
mzspec:PXD023738:S4_19_48_44.mzXML:scan:8269:YIC[+57.0215]ENQDSISSK/2	ARP-Plasma:ARP-OxHSA
mzspec:PXD023738:S4_19_48_45.mzXML:scan:7807:YIC[+57.0215]ENQDSISSK/2	ARP-Plasma:ARP-OxHSA
mzspec:PXD023738:S4_19_48_42.mzXML:scan:8134:YIC[+57.0215]ENQDSISSK/2	ARP-Plasma:ARP-OxHSA
mzspec:PXD023738:S4_19_48_45.mzXML:scan:7327:YIC[+57.0215]ENQDSISSK/2	ARP-Plasma:ARP-OxHSA
mzspec:PXD023738:S4_19_48_43.mzXML:scan:6825:YIC[+57.0215]ENQDSISSK/2	ARP-Plasma:ARP-OxHSA
mzspec:PXD023738:S4_19_48_41.mzXML:scan:8569:YIC[+57.0215]ENQDSISSK/2	ARP-Plasma:ARP-OxHSA
mzspec:PXD023738:S4_19_48_41.mzXML:scan:10254:YIC[+57.0215]ENQDSISSK/2	ARP-Plasma:ARP-OxHSA
mzspec:PXD023738:S4_19_48_42.mzXML:scan:8268:YIC[+57.0215]ENQDSISSK/2	ARP-Plasma:ARP-OxHSA
mzspec:PXD023738:S4_19_48_42.mzXML:scan:7188:YIC[+57.0215]ENQDSISSK/2	ARP-Plasma:ARP-OxHSA
mzspec:PXD023738:S4_19_48_44.mzXML:scan:9778:YIC[+57.0215]ENQDSISSK/2	ARP-Plasma:ARP-OxHSA
mzspec:PXD023738:S4_19_48_45.mzXML:scan:9893:YIC[+57.0215]ENQDSISSK/2	ARP-Plasma:ARP-OxHSA
mzspec:PXD023738:S4_19_48_45.mzXML:scan:7515:YIC[+57.0215]ENQDSISSK/2	ARP-Plasma:ARP-OxHSA
mzspec:PXD023738:S4_19_48_45.mzXML:scan:7312:YIC[+57.0215]ENQDSISSK/2	ARP-Plasma:ARP-OxHSA
mzspec:PXD023738:S4_19_48_45.mzXML:scan:7607:YIC[+57.0215]ENQDSISSK/2	ARP-Plasma:ARP-OxHSA
mzspec:PXD023738:S4_19_48_45.mzXML:scan:7578:YIC[+57.0215]ENQDSISSK/2	ARP-Plasma:ARP-OxHSA
mzspec:PXD023738:S4_19_48_45.mzXML:scan:7731:YIC[+57.0215]ENQDSISSK/2	ARP-Plasma:ARP-OxHSA
mzspec:PXD023738:S4_19_48_43.mzXML:scan:7708:YIC[+57.0215]ENQDSISSK/2	ARP-Plasma:ARP-OxHSA
mzspec:PXD023738:S4_19_48_43.mzXML:scan:7285:YIC[+57.0215]ENQDSISSK/2	ARP-Plasma:ARP-OxHSA
mzspec:PXD023738:S4_19_48_45.mzXML:scan:7265:YIC[+57.0215]ENQDSISSK/2	ARP-Plasma:ARP-OxHSA
mzspec:PXD023738:S4_19_48_45.mzXML:scan:7998:YIC[+57.0215]ENQDSISSK/2	ARP-Plasma:ARP-OxHSA
mzspec:PXD023738:S4_19_48_40.mzXML:scan:8324:YIC[+57.0215]ENQDSISSK/2	ARP-Plasma:ARP-OxHSA
mzspec:PXD023738:S4_19_48_41.mzXML:scan:7961:YIC[+57.0215]ENQDSISSK/2	ARP-Plasma:ARP-OxHSA
mzspec:PXD023738:S4_19_48_43.mzXML:scan:6223:YIC[+57.0215]ENQDSISSK/2	ARP-Plasma:ARP-OxHSA
mzspec:PXD023738:S4_19_48_45.mzXML:scan:7621:YIC[+57.0215]ENQDSISSK/2	ARP-Plasma:ARP-OxHSA
mzspec:PXD023738:S4_19_48_42.mzXML:scan:7314:YIC[+57.0215]ENQDSISSK/2	ARP-Plasma:ARP-OxHSA
mzspec:PXD023738:S4_19_48_42.mzXML:scan:7783:YIC[+57.0215]ENQDSISSK/2	ARP-Plasma:ARP-OxHSA
mzspec:PXD023738:S4_19_48_45.mzXML:scan:8564:YIC[+57.0215]ENQDSISSK/2	ARP-Plasma:ARP-OxHSA
mzspec:PXD023738:S4_19_48_43.mzXML:scan:6660:YIC[+57.0215]ENQDSISSK/2	ARP-Plasma:ARP-OxHSA
mzspec:PXD023738:S4_19_48_43.mzXML:scan:6640:YIC[+57.0215]ENQDSISSK/2	ARP-Plasma:ARP-OxHSA
mzspec:PXD023738:S4_19_48_42.mzXML:scan:8199:YIC[+57.0215]ENQDSISSK/2	ARP-Plasma:ARP-OxHSA
mzspec:PXD023738:S4_19_48_44.mzXML:scan:8381:YIC[+57.0215]ENQDSISSK/2	ARP-Plasma:ARP-OxHSA
mzspec:PXD023738:S4_19_48_43.mzXML:scan:6208:YIC[+57.0215]ENQDSISSK/2	ARP-Plasma:ARP-OxHSA
mzspec:PXD023738:S4_19_48_41.mzXML:scan:6864:YIC[+57.0215]ENQDSISSK/2	ARP-Plasma:ARP-OxHSA
mzspec:PXD023738:S4_19_48_45.mzXML:scan:8539:YIC[+57.0215]ENQDSISSK/2	ARP-Plasma:ARP-OxHSA
mzspec:PXD023738:S4_19_48_40.mzXML:scan:9623:YIC[+57.0215]ENQDSISSK/2	ARP-Plasma:ARP-OxHSA
mzspec:PXD023738:S4_19_48_41.mzXML:scan:7072:YIC[+57.0215]ENQDSISSK/2	ARP-Plasma:ARP-OxHSA
mzspec:PXD023738:S4_19_48_45.mzXML:scan:7788:YIC[+57.0215]ENQDSISSK/2	ARP-Plasma:ARP-OxHSA
mzspec:PXD023738:S4_19_48_42.mzXML:scan:7484:YIC[+57.0215]ENQDSISSK/2	ARP-Plasma:ARP-OxHSA
mzspec:PXD023738:S4_19_48_45.mzXML:scan:8700:YIC[+57.0215]ENQDSISSK/2	ARP-Plasma:ARP-OxHSA
mzspec:PXD023738:S4_19_48_45.mzXML:scan:7430:YIC[+57.0215]ENQDSISSK/2	ARP-Plasma:ARP-OxHSA
mzspec:PXD023738:S4_19_48_45.mzXML:scan:7984:YIC[+57.0215]ENQDSISSK/2	ARP-Plasma:ARP-OxHSA
mzspec:PXD023738:S4_19_48_43.mzXML:scan:7622:YIC[+57.0215]ENQDSISSK/2	ARP-Plasma:ARP-OxHSA
mzspec:PXD023738:S4_19_48_45.mzXML:scan:7190:YIC[+57.0215]ENQDSISSK/2	ARP-Plasma:ARP-OxHSA
mzspec:PXD023738:S4_19_48_40.mzXML:scan:6250:YIC[+57.0215]ENQDSISSK/2	ARP-Plasma:ARP-OxHSA
mzspec:PXD023738:S4_19_48_43.mzXML:scan:7198:YIC[+57.0215]ENQDSISSK/2	ARP-Plasma:ARP-OxHSA
mzspec:PXD023738:S4_19_48_40.mzXML:scan:8059:YIC[+57.0215]ENQDSISSK/2	ARP-Plasma:ARP-OxHSA
mzspec:PXD023738:S4_19_48_45.mzXML:scan:8510:YIC[+57.0215]ENQDSISSK/2	ARP-Plasma:ARP-OxHSA
mzspec:PXD023738:S4_19_48_45.mzXML:scan:7243:YIC[+57.0215]ENQDSISSK/2	ARP-Plasma:ARP-OxHSA
mzspec:PXD023738:S4_19_48_43.mzXML:scan:7505:YIC[+57.0215]ENQDSISSK/2	ARP-Plasma:ARP-OxHSA
mzspec:PXD023738:S4_19_48_45.mzXML:scan:7624:YIC[+57.0215]ENQDSISSK/2	ARP-Plasma:ARP-OxHSA
mzspec:PXD023738:S4_19_48_43.mzXML:scan:7320:YIC[+57.0215]ENQDSISSK/2	ARP-Plasma:ARP-OxHSA
mzspec:PXD023738:S4_19_48_43.mzXML:scan:7744:YIC[+57.0215]ENQDSISSK/2	ARP-Plasma:ARP-OxHSA
mzspec:PXD023738:S4_19_48_42.mzXML:scan:9715:YIC[+57.0215]ENQDSISSK/2	ARP-Plasma:ARP-OxHSA
mzspec:PXD023738:S4_19_48_45.mzXML:scan:7304:YIC[+57.0215]ENQDSISSK/2	ARP-Plasma:ARP-OxHSA
mzspec:PXD023738:S4_19_48_43.mzXML:scan:7276:YIC[+57.0215]ENQDSISSK/2	ARP-Plasma:ARP-OxHSA
mzspec:PXD023738:S4_19_48_45.mzXML:scan:8313:YIC[+57.0215]ENQDSISSK/2	ARP-Plasma:ARP-OxHSA
mzspec:PXD023738:S4_19_48_42.mzXML:scan:8591:YIC[+57.0215]ENQDSISSK/2	ARP-Plasma:ARP-OxHSA
mzspec:PXD023738:S4_19_48_45.mzXML:scan:10102:YIC[+57.0215]ENQDSISSK/2	ARP-Plasma:ARP-OxHSA
mzspec:PXD023738:S4_19_48_45.mzXML:scan:8477:YIC[+57.0215]ENQDSISSK/2	ARP-Plasma:ARP-OxHSA
mzspec:PXD023738:S4_19_48_45.mzXML:scan:8434:YIC[+57.0215]ENQDSISSK/2	ARP-Plasma:ARP-OxHSA
mzspec:PXD023738:S4_19_48_43.mzXML:scan:6690:YIC[+57.0215]ENQDSISSK/2	ARP-Plasma:ARP-OxHSA
mzspec:PXD023738:S4_19_48_41.mzXML:scan:9825:YIC[+57.0215]ENQDSISSK/2	ARP-Plasma:ARP-OxHSA
mzspec:PXD023738:S4_19_48_43.mzXML:scan:7639:YIC[+57.0215]ENQDSISSK/2	ARP-Plasma:ARP-OxHSA
mzspec:PXD023738:S4_19_48_43.mzXML:scan:6165:YIC[+57.0215]ENQDSISSK/2	ARP-Plasma:ARP-OxHSA
mzspec:PXD023738:S4_19_48_41.mzXML:scan:7473:YIC[+57.0215]ENQDSISSK/2	ARP-Plasma:ARP-OxHSA
mzspec:PXD023738:S4_19_48_43.mzXML:scan:7382:YIC[+57.0215]ENQDSISSK/2	ARP-Plasma:ARP-OxHSA
mzspec:PXD023738:S4_19_48_41.mzXML:scan:7849:YIC[+57.0215]ENQDSISSK/2	ARP-Plasma:ARP-OxHSA
mzspec:PXD023738:S4_19_48_43.mzXML:scan:6833:YIC[+57.0215]ENQDSISSK/2	ARP-Plasma:ARP-OxHSA
mzspec:PXD023738:S4_19_48_43.mzXML:scan:7663:YIC[+57.0215]ENQDSISSK/2	ARP-Plasma:ARP-OxHSA
mzspec:PXD023738:S4_19_48_45.mzXML:scan:8453:YIC[+57.0215]ENQDSISSK/2	ARP-Plasma:ARP-OxHSA
mzspec:PXD023738:S4_19_48_45.mzXML:scan:7813:YIC[+57.0215]ENQDSISSK/2	ARP-Plasma:ARP-OxHSA
mzspec:PXD023738:S4_19_48_45.mzXML:scan:7175:YIC[+57.0215]ENQDSISSK/2	ARP-Plasma:ARP-OxHSA
mzspec:PXD023738:S4_19_48_41.mzXML:scan:6938:YIC[+57.0215]ENQDSISSK/2	ARP-Plasma:ARP-OxHSA
mzspec:PXD023738:S4_19_48_42.mzXML:scan:7626:YIC[+57.0215]ENQDSISSK/2	ARP-Plasma:ARP-OxHSA
mzspec:PXD023738:S4_19_48_42.mzXML:scan:7579:YIC[+57.0215]ENQDSISSK/2	ARP-Plasma:ARP-OxHSA
mzspec:PXD023738:S4_19_48_41.mzXML:scan:10394:YIC[+57.0215]ENQDSISSK/2	ARP-Plasma:ARP-OxHSA
mzspec:PXD023738:S4_19_48_43.mzXML:scan:8185:YIC[+57.0215]ENQDSISSK/2	ARP-Plasma:ARP-OxHSA
mzspec:PXD023738:S4_19_48_42.mzXML:scan:8631:YIC[+57.0215]ENQDSISSK/2	ARP-Plasma:ARP-OxHSA
mzspec:PXD023738:S4_19_48_45.mzXML:scan:7675:YIC[+57.0215]ENQDSISSK/2	ARP-Plasma:ARP-OxHSA
mzspec:PXD023738:S4_19_48_42.mzXML:scan:7562:YIC[+57.0215]ENQDSISSK/2	ARP-Plasma:ARP-OxHSA
mzspec:PXD023738:S4_19_48_45.mzXML:scan:7358:YIC[+57.0215]ENQDSISSK/2	ARP-Plasma:ARP-OxHSA
mzspec:PXD023738:S4_19_48_43.mzXML:scan:5309:AVM[+15.9949]DDFAAFVEK/2	ARP-Plasma:ARP-OxHSA
mzspec:PXD023738:S4_19_48_42.mzXML:scan:5367:AVM[+15.9949]DDFAAFVEK/2	ARP-Plasma:ARP-OxHSA
mzspec:PXD023738:S4_19_48_40.mzXML:scan:5467:AVM[+15.9949]DDFAAFVEK/2	ARP-Plasma:ARP-OxHSA
mzspec:PXD023738:S4_19_48_44.mzXML:scan:5338:AVM[+15.9949]DDFAAFVEK/2	ARP-Plasma:ARP-OxHSA
mzspec:PXD023738:S4_19_48_45.mzXML:scan:5358:AVM[+15.9949]DDFAAFVEK/2	ARP-Plasma:ARP-OxHSA
mzspec:PXD023738:S4_19_48_41.mzXML:scan:5404:AVM[+15.9949]DDFAAFVEK/2	ARP-Plasma:ARP-OxHSA
mzspec:PXD023738:S4_19_48_40.mzXML:scan:5830:AVM[+15.9949]DDFAAFVEK/2	ARP-Plasma:ARP-OxHSA
mzspec:PXD023738:S4_19_48_42.mzXML:scan:5437:AVM[+15.9949]DDFAAFVEK/2	ARP-Plasma:ARP-OxHSA
mzspec:PXD023738:S4_19_48_43.mzXML:scan:6080:AVM[+15.9949]DDFAAFVEK/2	ARP-Plasma:ARP-OxHSA
mzspec:PXD023738:S4_19_48_44.mzXML:scan:5749:AVM[+15.9949]DDFAAFVEK/2	ARP-Plasma:ARP-OxHSA
mzspec:PXD023738:S4_19_48_43.mzXML:scan:6293:AVM[+15.9949]DDFAAFVEK/2	ARP-Plasma:ARP-OxHSA
mzspec:PXD023738:S4_19_48_41.mzXML:scan:5785:AVM[+15.9949]DDFAAFVEK/2	ARP-Plasma:ARP-OxHSA
mzspec:PXD023738:S4_19_48_42.mzXML:scan:6170:AVM[+15.9949]DDFAAFVEK/2	ARP-Plasma:ARP-OxHSA
mzspec:PXD023738:S4_19_48_41.mzXML:scan:6092:AVM[+15.9949]DDFAAFVEK/2	ARP-Plasma:ARP-OxHSA
mzspec:PXD023738:S4_19_48_45.mzXML:scan:6170:AVM[+15.9949]DDFAAFVEK/2	ARP-Plasma:ARP-OxHSA
mzspec:PXD023738:S4_19_48_45.mzXML:scan:6640:AVM[+15.9949]DDFAAFVEK/2	ARP-Plasma:ARP-OxHSA
mzspec:PXD023738:S4_19_48_43.mzXML:scan:4744:KVPQVSTPTLVEVSR/3	ARP-Plasma:ARP-OxHSA
mzspec:PXD023738:S4_19_48_43.mzXML:scan:4714:KVPQVSTPTLVEVSR/2	ARP-Plasma:ARP-OxHSA
mzspec:PXD023738:S4_19_48_45.mzXML:scan:4752:KVPQVSTPTLVEVSR/2	ARP-Plasma:ARP-OxHSA
mzspec:PXD023738:S4_19_48_40.mzXML:scan:4885:KVPQVSTPTLVEVSR/2	ARP-Plasma:ARP-OxHSA
mzspec:PXD023738:S4_19_48_43.mzXML:scan:4690:KVPQVSTPTLVEVSR/3	ARP-Plasma:ARP-OxHSA
mzspec:PXD023738:S4_19_48_43.mzXML:scan:4766:KVPQVSTPTLVEVSR/3	ARP-Plasma:ARP-OxHSA
mzspec:PXD023738:S4_19_48_45.mzXML:scan:4764:KVPQVSTPTLVEVSR/3	ARP-Plasma:ARP-OxHSA
mzspec:PXD023738:S4_19_48_49.mzXML:scan:4171:KVPQVSTPTLVEVSR/3	ARP-Plasma:ARP-OxHSA
mzspec:PXD023738:S4_19_48_42.mzXML:scan:4773:KVPQVSTPTLVEVSR/2	ARP-Plasma:ARP-OxHSA
mzspec:PXD023738:S4_19_48_44.mzXML:scan:4731:KVPQVSTPTLVEVSR/2	ARP-Plasma:ARP-OxHSA
mzspec:PXD023738:S4_19_48_40.mzXML:scan:4884:KVPQVSTPTLVEVSR/3	ARP-Plasma:ARP-OxHSA
mzspec:PXD023738:S4_19_48_47.mzXML:scan:4041:KVPQVSTPTLVEVSR/3	ARP-Plasma:ARP-OxHSA
mzspec:PXD023738:S4_19_48_49.mzXML:scan:4153:KVPQVSTPTLVEVSR/3	ARP-Plasma:ARP-OxHSA
mzspec:PXD023738:S4_19_48_40.mzXML:scan:4964:KVPQVSTPTLVEVSR/3	ARP-Plasma:ARP-OxHSA
mzspec:PXD023738:S4_19_48_44.mzXML:scan:4737:KVPQVSTPTLVEVSR/3	ARP-Plasma:ARP-OxHSA
mzspec:PXD023738:S4_19_48_41.mzXML:scan:4866:KVPQVSTPTLVEVSR/3	ARP-Plasma:ARP-OxHSA
mzspec:PXD023738:S4_19_48_41.mzXML:scan:4798:KVPQVSTPTLVEVSR/3	ARP-Plasma:ARP-OxHSA
mzspec:PXD023738:S4_19_48_43.mzXML:scan:4787:KVPQVSTPTLVEVSR/3	ARP-Plasma:ARP-OxHSA
mzspec:PXD023738:S4_19_48_42.mzXML:scan:4879:KVPQVSTPTLVEVSR/3	ARP-Plasma:ARP-OxHSA
mzspec:PXD023738:S4_19_48_43.mzXML:scan:7241:KVPQVSTPTLVEVSR/3	ARP-Plasma:ARP-OxHSA
mzspec:PXD023738:S4_19_48_42.mzXML:scan:4779:KVPQVSTPTLVEVSR/3	ARP-Plasma:ARP-OxHSA
mzspec:PXD023738:S4_19_48_44.mzXML:scan:4801:KVPQVSTPTLVEVSR/3	ARP-Plasma:ARP-OxHSA
mzspec:PXD023738:S4_19_48_44.mzXML:scan:4819:KVPQVSTPTLVEVSR/3	ARP-Plasma:ARP-OxHSA
mzspec:PXD023738:S4_19_48_49.mzXML:scan:330:KVPQVSTPTLVEVSR/3	ARP-Plasma:ARP-OxHSA
mzspec:PXD023738:S4_19_48_48.mzXML:scan:4100:KVPQVSTPTLVEVSR/3	ARP-Plasma:ARP-OxHSA
mzspec:PXD023738:S4_19_48_42.mzXML:scan:4836:KVPQVSTPTLVEVSR/3	ARP-Plasma:ARP-OxHSA
mzspec:PXD023738:S4_19_48_41.mzXML:scan:4810:KVPQVSTPTLVEVSR/2	ARP-Plasma:ARP-OxHSA
mzspec:PXD023738:S4_19_48_45.mzXML:scan:4815:KVPQVSTPTLVEVSR/3	ARP-Plasma:ARP-OxHSA
mzspec:PXD023738:S4_19_48_41.mzXML:scan:4886:KVPQVSTPTLVEVSR/3	ARP-Plasma:ARP-OxHSA
mzspec:PXD023738:S4_19_48_45.mzXML:scan:8482:KVPQVSTPTLVEVSR/3	ARP-Plasma:ARP-OxHSA
mzspec:PXD023738:S4_19_48_43.mzXML:scan:6851:KVPQVSTPTLVEVSR/3	ARP-Plasma:ARP-OxHSA
mzspec:PXD023738:S4_19_48_40.mzXML:scan:6331:KVPQVSTPTLVEVSR/3	ARP-Plasma:ARP-OxHSA
mzspec:PXD023738:S4_19_48_46.mzXML:scan:4075:KVPQVSTPTLVEVSR/3	ARP-Plasma:ARP-OxHSA
mzspec:PXD023738:S4_19_48_42.mzXML:scan:6632:KVPQVSTPTLVEVSR/3	ARP-Plasma:ARP-OxHSA
mzspec:PXD023738:S4_19_48_47.mzXML:scan:4025:KVPQVSTPTLVEVSR/3	ARP-Plasma:ARP-OxHSA
mzspec:PXD023738:S4_19_48_46.mzXML:scan:4094:KVPQVSTPTLVEVSR/3	ARP-Plasma:ARP-OxHSA
mzspec:PXD023738:S4_19_48_47.mzXML:scan:4035:KVPQVSTPTLVEVSR/2	ARP-Plasma:ARP-OxHSA
mzspec:PXD023738:S4_19_48_43.mzXML:scan:7310:KVPQVSTPTLVEVSR/3	ARP-Plasma:ARP-OxHSA
mzspec:PXD023738:S4_19_48_42.mzXML:scan:6715:KVPQVSTPTLVEVSR/3	ARP-Plasma:ARP-OxHSA
mzspec:PXD023738:S4_19_48_43.mzXML:scan:6688:KVPQVSTPTLVEVSR/3	ARP-Plasma:ARP-OxHSA
mzspec:PXD023738:S4_19_48_43.mzXML:scan:7832:KVPQVSTPTLVEVSR/3	ARP-Plasma:ARP-OxHSA
mzspec:PXD023738:S4_19_48_45.mzXML:scan:6039:KVPQVSTPTLVEVSR/3	ARP-Plasma:ARP-OxHSA
mzspec:PXD023738:S4_19_48_47.mzXML:scan:4059:KVPQVSTPTLVEVSR/3	ARP-Plasma:ARP-OxHSA
mzspec:PXD023738:S4_19_48_44.mzXML:scan:7080:KVPQVSTPTLVEVSR/3	ARP-Plasma:ARP-OxHSA
mzspec:PXD023738:S4_19_48_49.mzXML:scan:4165:KVPQVSTPTLVEVSR/2	ARP-Plasma:ARP-OxHSA
mzspec:PXD023738:S4_19_48_40.mzXML:scan:6670:KVPQVSTPTLVEVSR/3	ARP-Plasma:ARP-OxHSA
mzspec:PXD023738:S4_19_48_50.mzXML:scan:4223:KVPQVSTPTLVEVSR/3	ARP-Plasma:ARP-OxHSA
mzspec:PXD023738:S4_19_48_48.mzXML:scan:4084:KVPQVSTPTLVEVSR/2	ARP-Plasma:ARP-OxHSA
mzspec:PXD023738:S4_19_48_50.mzXML:scan:4241:KVPQVSTPTLVEVSR/3	ARP-Plasma:ARP-OxHSA
mzspec:PXD023738:S4_19_48_44.mzXML:scan:7829:KVPQVSTPTLVEVSR/3	ARP-Plasma:ARP-OxHSA
mzspec:PXD023738:S4_19_48_48.mzXML:scan:4119:KVPQVSTPTLVEVSR/3	ARP-Plasma:ARP-OxHSA
mzspec:PXD023738:S4_19_48_43.mzXML:scan:8538:KVPQVSTPTLVEVSR/3	ARP-Plasma:ARP-OxHSA
mzspec:PXD023738:S4_19_48_44.mzXML:scan:7505:KVPQVSTPTLVEVSR/3	ARP-Plasma:ARP-OxHSA
mzspec:PXD023738:S4_19_48_43.mzXML:scan:7359:KVPQVSTPTLVEVSR/3	ARP-Plasma:ARP-OxHSA
mzspec:PXD023738:S4_19_48_44.mzXML:scan:9039:KVPQVSTPTLVEVSR/3	ARP-Plasma:ARP-OxHSA
mzspec:PXD023738:S4_19_48_44.mzXML:scan:8536:KVPQVSTPTLVEVSR/3	ARP-Plasma:ARP-OxHSA
mzspec:PXD023738:S4_19_48_45.mzXML:scan:8429:KVPQVSTPTLVEVSR/3	ARP-Plasma:ARP-OxHSA
mzspec:PXD023738:S4_19_48_43.mzXML:scan:7644:KVPQVSTPTLVEVSR/3	ARP-Plasma:ARP-OxHSA
mzspec:PXD023738:S4_19_48_43.mzXML:scan:7670:KVPQVSTPTLVEVSR/3	ARP-Plasma:ARP-OxHSA
mzspec:PXD023738:S4_19_48_45.mzXML:scan:9703:KVPQVSTPTLVEVSR/3	ARP-Plasma:ARP-OxHSA
mzspec:PXD023738:S4_19_48_46.mzXML:scan:4065:KVPQVSTPTLVEVSR/2	ARP-Plasma:ARP-OxHSA
mzspec:PXD023738:S4_19_48_42.mzXML:scan:6889:KVPQVSTPTLVEVSR/3	ARP-Plasma:ARP-OxHSA
mzspec:PXD023738:S4_19_48_42.mzXML:scan:8990:KVPQVSTPTLVEVSR/3	ARP-Plasma:ARP-OxHSA
mzspec:PXD023738:S4_19_48_45.mzXML:scan:8861:KVPQVSTPTLVEVSR/3	ARP-Plasma:ARP-OxHSA
mzspec:PXD023738:S4_19_48_46.mzXML:scan:340:KVPQVSTPTLVEVSR/3	ARP-Plasma:ARP-OxHSA
mzspec:PXD023738:S4_19_48_44.mzXML:scan:7019:KVPQVSTPTLVEVSR/3	ARP-Plasma:ARP-OxHSA
mzspec:PXD023738:S4_19_48_42.mzXML:scan:8448:KVPQVSTPTLVEVSR/3	ARP-Plasma:ARP-OxHSA
mzspec:PXD023738:S4_19_48_43.mzXML:scan:5875:KVPQVSTPTLVEVSR/3	ARP-Plasma:ARP-OxHSA
mzspec:PXD023738:S4_19_48_40.mzXML:scan:7434:KVPQVSTPTLVEVSR/3	ARP-Plasma:ARP-OxHSA
mzspec:PXD023738:S4_19_48_42.mzXML:scan:6318:KVPQVSTPTLVEVSR/3	ARP-Plasma:ARP-OxHSA
mzspec:PXD023738:S4_19_48_45.mzXML:scan:8332:KVPQVSTPTLVEVSR/3	ARP-Plasma:ARP-OxHSA
mzspec:PXD023738:S4_19_48_41.mzXML:scan:9165:KVPQVSTPTLVEVSR/3	ARP-Plasma:ARP-OxHSA
mzspec:PXD023738:S4_19_48_43.mzXML:scan:6884:KVPQVSTPTLVEVSR/3	ARP-Plasma:ARP-OxHSA
mzspec:PXD023738:S4_19_48_43.mzXML:scan:7384:KVPQVSTPTLVEVSR/3	ARP-Plasma:ARP-OxHSA
mzspec:PXD023738:S4_19_48_50.mzXML:scan:4229:KVPQVSTPTLVEVSR/2	ARP-Plasma:ARP-OxHSA
mzspec:PXD023738:S4_19_48_48.mzXML:scan:324:KVPQVSTPTLVEVSR/3	ARP-Plasma:ARP-OxHSA
mzspec:PXD023738:S4_19_48_45.mzXML:scan:8842:KVPQVSTPTLVEVSR/3	ARP-Plasma:ARP-OxHSA
mzspec:PXD023738:S4_19_48_41.mzXML:scan:5947:KVPQVSTPTLVEVSR/3	ARP-Plasma:ARP-OxHSA
mzspec:PXD023738:S4_19_48_44.mzXML:scan:8304:KVPQVSTPTLVEVSR/3	ARP-Plasma:ARP-OxHSA
mzspec:PXD023738:S4_19_48_45.mzXML:scan:6876:KVPQVSTPTLVEVSR/3	ARP-Plasma:ARP-OxHSA
mzspec:PXD023738:S4_19_48_41.mzXML:scan:7694:KVPQVSTPTLVEVSR/3	ARP-Plasma:ARP-OxHSA
mzspec:PXD023738:S4_19_48_43.mzXML:scan:7590:KVPQVSTPTLVEVSR/3	ARP-Plasma:ARP-OxHSA
mzspec:PXD023738:S4_19_48_44.mzXML:scan:8331:KVPQVSTPTLVEVSR/3	ARP-Plasma:ARP-OxHSA
mzspec:PXD023738:S4_19_48_43.mzXML:scan:6670:KVPQVSTPTLVEVSR/3	ARP-Plasma:ARP-OxHSA
mzspec:PXD023738:S4_19_48_44.mzXML:scan:7658:KVPQVSTPTLVEVSR/3	ARP-Plasma:ARP-OxHSA
mzspec:PXD023738:S4_19_48_41.mzXML:scan:7321:KVPQVSTPTLVEVSR/3	ARP-Plasma:ARP-OxHSA
mzspec:PXD023738:S4_19_48_42.mzXML:scan:6578:KVPQVSTPTLVEVSR/3	ARP-Plasma:ARP-OxHSA
mzspec:PXD023738:S4_19_48_45.mzXML:scan:5793:KVPQVSTPTLVEVSR/3	ARP-Plasma:ARP-OxHSA
mzspec:PXD023738:S4_19_48_42.mzXML:scan:6603:KVPQVSTPTLVEVSR/3	ARP-Plasma:ARP-OxHSA
mzspec:PXD023738:S4_19_48_43.mzXML:scan:6919:KVPQVSTPTLVEVSR/3	ARP-Plasma:ARP-OxHSA
mzspec:PXD023738:S4_19_48_42.mzXML:scan:6865:KVPQVSTPTLVEVSR/3	ARP-Plasma:ARP-OxHSA
mzspec:PXD023738:S4_19_48_50.mzXML:scan:322:KVPQVSTPTLVEVSR/3	ARP-Plasma:ARP-OxHSA
mzspec:PXD023738:S4_19_48_44.mzXML:scan:6992:KVPQVSTPTLVEVSR/3	ARP-Plasma:ARP-OxHSA
mzspec:PXD023738:S4_19_48_43.mzXML:scan:7626:KVPQVSTPTLVEVSR/3	ARP-Plasma:ARP-OxHSA
mzspec:PXD023738:S4_19_48_44.mzXML:scan:7599:KVPQVSTPTLVEVSR/3	ARP-Plasma:ARP-OxHSA
mzspec:PXD023738:S4_19_48_41.mzXML:scan:6505:KVPQVSTPTLVEVSR/3	ARP-Plasma:ARP-OxHSA
mzspec:PXD023738:S4_19_48_42.mzXML:scan:6787:KVPQVSTPTLVEVSR/3	ARP-Plasma:ARP-OxHSA
mzspec:PXD023738:S4_19_48_42.mzXML:scan:7158:KVPQVSTPTLVEVSR/3	ARP-Plasma:ARP-OxHSA
mzspec:PXD023738:S4_19_48_41.mzXML:scan:6542:KVPQVSTPTLVEVSR/3	ARP-Plasma:ARP-OxHSA
mzspec:PXD023738:S4_19_48_41.mzXML:scan:6492:KVPQVSTPTLVEVSR/3	ARP-Plasma:ARP-OxHSA
mzspec:PXD023738:S4_19_48_44.mzXML:scan:7696:KVPQVSTPTLVEVSR/3	ARP-Plasma:ARP-OxHSA
mzspec:PXD023738:S4_19_48_44.mzXML:scan:7347:KVPQVSTPTLVEVSR/3	ARP-Plasma:ARP-OxHSA
mzspec:PXD023738:S4_19_48_41.mzXML:scan:340:KVPQVSTPTLVEVSR/3	ARP-Plasma:ARP-OxHSA
mzspec:PXD023738:S4_19_48_44.mzXML:scan:7394:KVPQVSTPTLVEVSR/3	ARP-Plasma:ARP-OxHSA
mzspec:PXD023738:S4_19_48_43.mzXML:scan:8167:KVPQVSTPTLVEVSR/3	ARP-Plasma:ARP-OxHSA
mzspec:PXD023738:S4_19_48_43.mzXML:scan:7216:KVPQVSTPTLVEVSR/3	ARP-Plasma:ARP-OxHSA
mzspec:PXD023738:S4_19_48_44.mzXML:scan:8636:KVPQVSTPTLVEVSR/3	ARP-Plasma:ARP-OxHSA
mzspec:PXD023738:S4_19_48_42.mzXML:scan:6552:KVPQVSTPTLVEVSR/3	ARP-Plasma:ARP-OxHSA
mzspec:PXD023738:S4_19_48_44.mzXML:scan:9945:KVPQVSTPTLVEVSR/3	ARP-Plasma:ARP-OxHSA
mzspec:PXD023738:S4_19_48_44.mzXML:scan:7524:KVPQVSTPTLVEVSR/3	ARP-Plasma:ARP-OxHSA
mzspec:PXD023738:S4_19_48_45.mzXML:scan:8545:KVPQVSTPTLVEVSR/3	ARP-Plasma:ARP-OxHSA
mzspec:PXD023738:S4_19_48_42.mzXML:scan:7217:KVPQVSTPTLVEVSR/3	ARP-Plasma:ARP-OxHSA
mzspec:PXD023738:S4_19_48_44.mzXML:scan:6221:KVPQVSTPTLVEVSR/3	ARP-Plasma:ARP-OxHSA
mzspec:PXD023738:S4_19_48_47.mzXML:scan:328:KVPQVSTPTLVEVSR/3	ARP-Plasma:ARP-OxHSA
mzspec:PXD023738:S4_19_48_44.mzXML:scan:7193:KVPQVSTPTLVEVSR/3	ARP-Plasma:ARP-OxHSA
mzspec:PXD023738:S4_19_48_43.mzXML:scan:6948:KVPQVSTPTLVEVSR/3	ARP-Plasma:ARP-OxHSA
mzspec:PXD023738:S4_19_48_45.mzXML:scan:6544:KVPQVSTPTLVEVSR/3	ARP-Plasma:ARP-OxHSA
mzspec:PXD023738:S4_19_48_43.mzXML:scan:6350:KVPQVSTPTLVEVSR/3	ARP-Plasma:ARP-OxHSA
mzspec:PXD023738:S4_19_48_45.mzXML:scan:7979:KVPQVSTPTLVEVSR/3	ARP-Plasma:ARP-OxHSA
mzspec:PXD023738:S4_19_48_44.mzXML:scan:7166:KVPQVSTPTLVEVSR/3	ARP-Plasma:ARP-OxHSA
mzspec:PXD023738:S4_19_48_43.mzXML:scan:7532:KVPQVSTPTLVEVSR/3	ARP-Plasma:ARP-OxHSA
mzspec:PXD023738:S4_19_48_43.mzXML:scan:6573:KVPQVSTPTLVEVSR/3	ARP-Plasma:ARP-OxHSA
mzspec:PXD023738:S4_19_48_44.mzXML:scan:5861:KVPQVSTPTLVEVSR/3	ARP-Plasma:ARP-OxHSA
mzspec:PXD023738:S4_19_48_44.mzXML:scan:8116:KVPQVSTPTLVEVSR/3	ARP-Plasma:ARP-OxHSA
mzspec:PXD023738:S4_19_48_45.mzXML:scan:10295:KVPQVSTPTLVEVSR/3	ARP-Plasma:ARP-OxHSA
mzspec:PXD023738:S4_19_48_43.mzXML:scan:6387:KVPQVSTPTLVEVSR/3	ARP-Plasma:ARP-OxHSA
mzspec:PXD023738:S4_19_48_41.mzXML:scan:7124:KVPQVSTPTLVEVSR/3	ARP-Plasma:ARP-OxHSA
mzspec:PXD023738:S4_19_48_40.mzXML:scan:6493:KVPQVSTPTLVEVSR/3	ARP-Plasma:ARP-OxHSA
mzspec:PXD023738:S4_19_48_43.mzXML:scan:7060:KVPQVSTPTLVEVSR/3	ARP-Plasma:ARP-OxHSA
mzspec:PXD023738:S4_19_48_43.mzXML:scan:7427:KVPQVSTPTLVEVSR/3	ARP-Plasma:ARP-OxHSA
mzspec:PXD023738:S4_19_48_43.mzXML:scan:7120:KVPQVSTPTLVEVSR/3	ARP-Plasma:ARP-OxHSA
mzspec:PXD023738:S4_19_48_44.mzXML:scan:8446:KVPQVSTPTLVEVSR/3	ARP-Plasma:ARP-OxHSA
mzspec:PXD023738:S4_19_48_40.mzXML:scan:9028:KVPQVSTPTLVEVSR/3	ARP-Plasma:ARP-OxHSA
mzspec:PXD023738:S4_19_48_43.mzXML:scan:7497:KVPQVSTPTLVEVSR/3	ARP-Plasma:ARP-OxHSA
mzspec:PXD023738:S4_19_48_41.mzXML:scan:7846:KVPQVSTPTLVEVSR/3	ARP-Plasma:ARP-OxHSA
mzspec:PXD023738:S4_19_48_43.mzXML:scan:6590:KVPQVSTPTLVEVSR/3	ARP-Plasma:ARP-OxHSA
mzspec:PXD023738:S4_19_48_43.mzXML:scan:7405:KVPQVSTPTLVEVSR/3	ARP-Plasma:ARP-OxHSA
mzspec:PXD023738:S4_19_48_43.mzXML:scan:6374:KVPQVSTPTLVEVSR/3	ARP-Plasma:ARP-OxHSA
mzspec:PXD023738:S4_19_48_40.mzXML:scan:8567:KVPQVSTPTLVEVSR/3	ARP-Plasma:ARP-OxHSA
mzspec:PXD023738:S4_19_48_42.mzXML:scan:6530:KVPQVSTPTLVEVSR/3	ARP-Plasma:ARP-OxHSA
mzspec:PXD023738:S4_19_48_43.mzXML:scan:7553:KVPQVSTPTLVEVSR/3	ARP-Plasma:ARP-OxHSA
mzspec:PXD023738:S4_19_48_42.mzXML:scan:7632:KVPQVSTPTLVEVSR/3	ARP-Plasma:ARP-OxHSA
mzspec:PXD023738:S4_19_48_43.mzXML:scan:10212:KVPQVSTPTLVEVSR/3	ARP-Plasma:ARP-OxHSA
mzspec:PXD023738:S4_19_48_42.mzXML:scan:8014:KVPQVSTPTLVEVSR/3	ARP-Plasma:ARP-OxHSA
mzspec:PXD023738:S4_19_48_44.mzXML:scan:8466:KVPQVSTPTLVEVSR/3	ARP-Plasma:ARP-OxHSA
mzspec:PXD023738:S4_19_48_41.mzXML:scan:6693:KVPQVSTPTLVEVSR/3	ARP-Plasma:ARP-OxHSA
mzspec:PXD023738:S4_19_48_44.mzXML:scan:8232:KVPQVSTPTLVEVSR/3	ARP-Plasma:ARP-OxHSA
mzspec:PXD023738:S4_19_48_44.mzXML:scan:8499:KVPQVSTPTLVEVSR/3	ARP-Plasma:ARP-OxHSA
mzspec:PXD023738:S4_19_48_45.mzXML:scan:7580:KVPQVSTPTLVEVSR/3	ARP-Plasma:ARP-OxHSA
mzspec:PXD023738:S4_19_48_42.mzXML:scan:6651:KVPQVSTPTLVEVSR/3	ARP-Plasma:ARP-OxHSA
mzspec:PXD023738:S4_19_48_45.mzXML:scan:6781:KVPQVSTPTLVEVSR/3	ARP-Plasma:ARP-OxHSA
mzspec:PXD023738:S4_19_48_44.mzXML:scan:7739:KVPQVSTPTLVEVSR/3	ARP-Plasma:ARP-OxHSA
mzspec:PXD023738:S4_19_48_42.mzXML:scan:6393:KVPQVSTPTLVEVSR/3	ARP-Plasma:ARP-OxHSA
mzspec:PXD023738:S4_19_48_43.mzXML:scan:7816:KVPQVSTPTLVEVSR/3	ARP-Plasma:ARP-OxHSA
mzspec:PXD023738:S4_19_48_44.mzXML:scan:8732:KVPQVSTPTLVEVSR/3	ARP-Plasma:ARP-OxHSA
mzspec:PXD023738:S4_19_48_45.mzXML:scan:355:KVPQVSTPTLVEVSR/3	ARP-Plasma:ARP-OxHSA
mzspec:PXD023738:S4_19_48_44.mzXML:scan:8200:KVPQVSTPTLVEVSR/3	ARP-Plasma:ARP-OxHSA
mzspec:PXD023738:S4_19_48_44.mzXML:scan:6973:KVPQVSTPTLVEVSR/3	ARP-Plasma:ARP-OxHSA
mzspec:PXD023738:S4_19_48_42.mzXML:scan:9786:KVPQVSTPTLVEVSR/3	ARP-Plasma:ARP-OxHSA
mzspec:PXD023738:S4_19_48_43.mzXML:scan:6724:KVPQVSTPTLVEVSR/3	ARP-Plasma:ARP-OxHSA
mzspec:PXD023738:S4_19_48_42.mzXML:scan:5916:KVPQVSTPTLVEVSR/3	ARP-Plasma:ARP-OxHSA
mzspec:PXD023738:S4_19_48_43.mzXML:scan:7142:KVPQVSTPTLVEVSR/3	ARP-Plasma:ARP-OxHSA
mzspec:PXD023738:S4_19_48_43.mzXML:scan:6968:KVPQVSTPTLVEVSR/3	ARP-Plasma:ARP-OxHSA
mzspec:PXD023738:S4_19_48_42.mzXML:scan:10095:KVPQVSTPTLVEVSR/3	ARP-Plasma:ARP-OxHSA
mzspec:PXD023738:S4_19_48_45.mzXML:scan:5757:KVPQVSTPTLVEVSR/3	ARP-Plasma:ARP-OxHSA
mzspec:PXD023738:S4_19_48_42.mzXML:scan:337:KVPQVSTPTLVEVSR/3	ARP-Plasma:ARP-OxHSA
mzspec:PXD023738:S4_19_48_40.mzXML:scan:6705:KVPQVSTPTLVEVSR/3	ARP-Plasma:ARP-OxHSA
mzspec:PXD023738:S4_19_48_42.mzXML:scan:6475:KVPQVSTPTLVEVSR/3	ARP-Plasma:ARP-OxHSA
mzspec:PXD023738:S4_19_48_43.mzXML:scan:341:KVPQVSTPTLVEVSR/3	ARP-Plasma:ARP-OxHSA
mzspec:PXD023738:S4_19_48_43.mzXML:scan:7852:KVPQVSTPTLVEVSR/3	ARP-Plasma:ARP-OxHSA
mzspec:PXD023738:S4_19_48_43.mzXML:scan:8460:KVPQVSTPTLVEVSR/3	ARP-Plasma:ARP-OxHSA
mzspec:PXD023738:S4_19_48_44.mzXML:scan:8041:KVPQVSTPTLVEVSR/3	ARP-Plasma:ARP-OxHSA
mzspec:PXD023738:S4_19_48_44.mzXML:scan:8150:KVPQVSTPTLVEVSR/3	ARP-Plasma:ARP-OxHSA
mzspec:PXD023738:S4_19_48_45.mzXML:scan:7927:KVPQVSTPTLVEVSR/3	ARP-Plasma:ARP-OxHSA
mzspec:PXD023738:S4_19_48_43.mzXML:scan:9722:KVPQVSTPTLVEVSR/3	ARP-Plasma:ARP-OxHSA
mzspec:PXD023738:S4_19_48_40.mzXML:scan:6730:KVPQVSTPTLVEVSR/3	ARP-Plasma:ARP-OxHSA
mzspec:PXD023738:S4_19_48_44.mzXML:scan:7251:KVPQVSTPTLVEVSR/3	ARP-Plasma:ARP-OxHSA
mzspec:PXD023738:S4_19_48_41.mzXML:scan:8362:KVPQVSTPTLVEVSR/3	ARP-Plasma:ARP-OxHSA
mzspec:PXD023738:S4_19_48_43.mzXML:scan:6627:KVPQVSTPTLVEVSR/3	ARP-Plasma:ARP-OxHSA
mzspec:PXD023738:S4_19_48_43.mzXML:scan:6813:KVPQVSTPTLVEVSR/3	ARP-Plasma:ARP-OxHSA
mzspec:PXD023738:S4_19_48_44.mzXML:scan:7630:KVPQVSTPTLVEVSR/3	ARP-Plasma:ARP-OxHSA
mzspec:PXD023738:S4_19_48_42.mzXML:scan:6733:KVPQVSTPTLVEVSR/3	ARP-Plasma:ARP-OxHSA
mzspec:PXD023738:S4_19_48_42.mzXML:scan:6815:KVPQVSTPTLVEVSR/3	ARP-Plasma:ARP-OxHSA
mzspec:PXD023738:S4_19_48_40.mzXML:scan:6867:KVPQVSTPTLVEVSR/3	ARP-Plasma:ARP-OxHSA
mzspec:PXD023738:S4_19_48_42.mzXML:scan:6449:KVPQVSTPTLVEVSR/3	ARP-Plasma:ARP-OxHSA
mzspec:PXD023738:S4_19_48_41.mzXML:scan:9007:KVPQVSTPTLVEVSR/3	ARP-Plasma:ARP-OxHSA
mzspec:PXD023738:S4_19_48_41.mzXML:scan:6574:KVPQVSTPTLVEVSR/3	ARP-Plasma:ARP-OxHSA
mzspec:PXD023738:S4_19_48_43.mzXML:scan:8334:KVPQVSTPTLVEVSR/3	ARP-Plasma:ARP-OxHSA
mzspec:PXD023738:S4_19_48_44.mzXML:scan:7996:KVPQVSTPTLVEVSR/3	ARP-Plasma:ARP-OxHSA
mzspec:PXD023738:S4_19_48_44.mzXML:scan:7471:KVPQVSTPTLVEVSR/3	ARP-Plasma:ARP-OxHSA
mzspec:PXD023738:S4_19_48_43.mzXML:scan:7471:KVPQVSTPTLVEVSR/3	ARP-Plasma:ARP-OxHSA
mzspec:PXD023738:S4_19_48_42.mzXML:scan:7354:KVPQVSTPTLVEVSR/3	ARP-Plasma:ARP-OxHSA
mzspec:PXD023738:S4_19_48_41.mzXML:scan:7983:KVPQVSTPTLVEVSR/3	ARP-Plasma:ARP-OxHSA
mzspec:PXD023738:S4_19_48_43.mzXML:scan:8000:KVPQVSTPTLVEVSR/3	ARP-Plasma:ARP-OxHSA
mzspec:PXD023738:S4_19_48_43.mzXML:scan:6607:KVPQVSTPTLVEVSR/3	ARP-Plasma:ARP-OxHSA
mzspec:PXD023738:S4_19_48_43.mzXML:scan:6902:KVPQVSTPTLVEVSR/3	ARP-Plasma:ARP-OxHSA
mzspec:PXD023738:S4_19_48_44.mzXML:scan:8570:KVPQVSTPTLVEVSR/3	ARP-Plasma:ARP-OxHSA
mzspec:PXD023738:S4_19_48_43.mzXML:scan:9886:KVPQVSTPTLVEVSR/3	ARP-Plasma:ARP-OxHSA
mzspec:PXD023738:S4_19_48_45.mzXML:scan:9737:KVPQVSTPTLVEVSR/3	ARP-Plasma:ARP-OxHSA
mzspec:PXD023738:S4_19_48_42.mzXML:scan:7543:KVPQVSTPTLVEVSR/3	ARP-Plasma:ARP-OxHSA
mzspec:PXD023738:S4_19_48_44.mzXML:scan:7141:KVPQVSTPTLVEVSR/3	ARP-Plasma:ARP-OxHSA
mzspec:PXD023738:S4_19_48_43.mzXML:scan:6405:KVPQVSTPTLVEVSR/3	ARP-Plasma:ARP-OxHSA
mzspec:PXD023738:S4_19_48_44.mzXML:scan:8418:KVPQVSTPTLVEVSR/3	ARP-Plasma:ARP-OxHSA
mzspec:PXD023738:S4_19_48_43.mzXML:scan:6545:KVPQVSTPTLVEVSR/3	ARP-Plasma:ARP-OxHSA
mzspec:PXD023738:S4_19_48_43.mzXML:scan:6864:KVPQVSTPTLVEVSR/3	ARP-Plasma:ARP-OxHSA
mzspec:PXD023738:S4_19_48_43.mzXML:scan:6466:KVPQVSTPTLVEVSR/3	ARP-Plasma:ARP-OxHSA
mzspec:PXD023738:S4_19_48_43.mzXML:scan:6501:KVPQVSTPTLVEVSR/3	ARP-Plasma:ARP-OxHSA
mzspec:PXD023738:S4_19_48_46.mzXML:scan:8177:KVPQVSTPTLVEVSR/3	ARP-Plasma:ARP-OxHSA
mzspec:PXD023738:S4_19_48_40.mzXML:scan:6753:KVPQVSTPTLVEVSR/3	ARP-Plasma:ARP-OxHSA
mzspec:PXD023738:S4_19_48_40.mzXML:scan:6466:KVPQVSTPTLVEVSR/3	ARP-Plasma:ARP-OxHSA
mzspec:PXD023738:S4_19_48_42.mzXML:scan:7052:KVPQVSTPTLVEVSR/3	ARP-Plasma:ARP-OxHSA
mzspec:PXD023738:S4_19_48_40.mzXML:scan:8205:KVPQVSTPTLVEVSR/3	ARP-Plasma:ARP-OxHSA
mzspec:PXD023738:S4_19_48_45.mzXML:scan:9636:KVPQVSTPTLVEVSR/3	ARP-Plasma:ARP-OxHSA
mzspec:PXD023738:S4_19_48_40.mzXML:scan:7028:KVPQVSTPTLVEVSR/3	ARP-Plasma:ARP-OxHSA
mzspec:PXD023738:S4_19_48_43.mzXML:scan:9996:KVPQVSTPTLVEVSR/3	ARP-Plasma:ARP-OxHSA
mzspec:PXD023738:S4_19_48_44.mzXML:scan:7452:KVPQVSTPTLVEVSR/3	ARP-Plasma:ARP-OxHSA
mzspec:PXD023738:S4_19_48_42.mzXML:scan:8211:KVPQVSTPTLVEVSR/3	ARP-Plasma:ARP-OxHSA
mzspec:PXD023738:S4_19_48_42.mzXML:scan:6371:KVPQVSTPTLVEVSR/3	ARP-Plasma:ARP-OxHSA
mzspec:PXD023738:S4_19_48_40.mzXML:scan:7943:KVPQVSTPTLVEVSR/3	ARP-Plasma:ARP-OxHSA
mzspec:PXD023738:S4_19_48_43.mzXML:scan:8195:KVPQVSTPTLVEVSR/3	ARP-Plasma:ARP-OxHSA
mzspec:PXD023738:S4_19_48_42.mzXML:scan:6510:KVPQVSTPTLVEVSR/3	ARP-Plasma:ARP-OxHSA
mzspec:PXD023738:S4_19_48_42.mzXML:scan:6431:KVPQVSTPTLVEVSR/3	ARP-Plasma:ARP-OxHSA
mzspec:PXD023738:S4_19_48_46.mzXML:scan:8130:KVPQVSTPTLVEVSR/3	ARP-Plasma:ARP-OxHSA
mzspec:PXD023738:S4_19_48_45.mzXML:scan:7847:KVPQVSTPTLVEVSR/3	ARP-Plasma:ARP-OxHSA
mzspec:PXD023738:S4_19_48_42.mzXML:scan:6258:KVPQVSTPTLVEVSR/3	ARP-Plasma:ARP-OxHSA
mzspec:PXD023738:S4_19_48_42.mzXML:scan:7313:KVPQVSTPTLVEVSR/3	ARP-Plasma:ARP-OxHSA
mzspec:PXD023738:S4_19_48_42.mzXML:scan:6412:KVPQVSTPTLVEVSR/3	ARP-Plasma:ARP-OxHSA
mzspec:PXD023738:S4_19_48_43.mzXML:scan:6785:KVPQVSTPTLVEVSR/3	ARP-Plasma:ARP-OxHSA
mzspec:PXD023738:S4_19_48_47.mzXML:scan:8163:KVPQVSTPTLVEVSR/3	ARP-Plasma:ARP-OxHSA
mzspec:PXD023738:S4_19_48_43.mzXML:scan:6523:KVPQVSTPTLVEVSR/3	ARP-Plasma:ARP-OxHSA
mzspec:PXD023738:S4_19_48_42.mzXML:scan:6336:KVPQVSTPTLVEVSR/3	ARP-Plasma:ARP-OxHSA
mzspec:PXD023738:S4_19_48_44.mzXML:scan:7050:KVPQVSTPTLVEVSR/3	ARP-Plasma:ARP-OxHSA
mzspec:PXD023738:S4_19_48_42.mzXML:scan:6493:KVPQVSTPTLVEVSR/3	ARP-Plasma:ARP-OxHSA
mzspec:PXD023738:S4_19_48_40.mzXML:scan:7667:KVPQVSTPTLVEVSR/3	ARP-Plasma:ARP-OxHSA
mzspec:PXD023738:S4_19_48_43.mzXML:scan:6998:KVPQVSTPTLVEVSR/3	ARP-Plasma:ARP-OxHSA
mzspec:PXD023738:S4_19_48_43.mzXML:scan:3442:AAFTEC[+57.0215]C[+57.0215]QAADK/2	ARP-Plasma:ARP-OxHSA
mzspec:PXD023738:S4_19_48_40.mzXML:scan:3768:AAFTEC[+57.0215]C[+57.0215]QAADK/2	ARP-Plasma:ARP-OxHSA
mzspec:PXD023738:S4_19_48_44.mzXML:scan:3507:AAFTEC[+57.0215]C[+57.0215]QAADK/2	ARP-Plasma:ARP-OxHSA
mzspec:PXD023738:S4_19_48_45.mzXML:scan:3504:AAFTEC[+57.0215]C[+57.0215]QAADK/2	ARP-Plasma:ARP-OxHSA
mzspec:PXD023738:S4_19_48_42.mzXML:scan:3535:AAFTEC[+57.0215]C[+57.0215]QAADK/2	ARP-Plasma:ARP-OxHSA
mzspec:PXD023738:S4_19_48_41.mzXML:scan:3522:AAFTEC[+57.0215]C[+57.0215]QAADK/2	ARP-Plasma:ARP-OxHSA
mzspec:PXD023738:S4_19_48_43.mzXML:scan:3679:AAFTEC[+57.0215]C[+57.0215]QAADK/2	ARP-Plasma:ARP-OxHSA
mzspec:PXD023738:S4_19_48_44.mzXML:scan:3708:AAFTEC[+57.0215]C[+57.0215]QAADK/2	ARP-Plasma:ARP-OxHSA
mzspec:PXD023738:S4_19_48_42.mzXML:scan:324:AAFTEC[+57.0215]C[+57.0215]QAADK/2	ARP-Plasma:ARP-OxHSA
mzspec:PXD023738:S4_19_48_41.mzXML:scan:328:AAFTEC[+57.0215]C[+57.0215]QAADK/2	ARP-Plasma:ARP-OxHSA
mzspec:PXD023738:S4_19_48_42.mzXML:scan:3745:AAFTEC[+57.0215]C[+57.0215]QAADK/2	ARP-Plasma:ARP-OxHSA
mzspec:PXD023738:S4_19_48_46.mzXML:scan:2836:AAFTEC[+57.0215]C[+57.0215]QAADK/2	ARP-Plasma:ARP-OxHSA
mzspec:PXD023738:S4_19_48_45.mzXML:scan:3733:AAFTEC[+57.0215]C[+57.0215]QAADK/2	ARP-Plasma:ARP-OxHSA
mzspec:PXD023738:S4_19_48_47.mzXML:scan:2772:AAFTEC[+57.0215]C[+57.0215]QAADK/2	ARP-Plasma:ARP-OxHSA
mzspec:PXD023738:S4_19_48_41.mzXML:scan:3751:AAFTEC[+57.0215]C[+57.0215]QAADK/2	ARP-Plasma:ARP-OxHSA
mzspec:PXD023738:S4_19_48_48.mzXML:scan:2842:AAFTEC[+57.0215]C[+57.0215]QAADK/2	ARP-Plasma:ARP-OxHSA
mzspec:PXD023738:S4_19_48_49.mzXML:scan:2924:AAFTEC[+57.0215]C[+57.0215]QAADK/2	ARP-Plasma:ARP-OxHSA
mzspec:PXD023738:S4_19_48_40.mzXML:scan:9132:AAFTEC[+57.0215]C[+57.0215]QAADK/2	ARP-Plasma:ARP-OxHSA
mzspec:PXD023738:S4_19_48_50.mzXML:scan:2955:AAFTEC[+57.0215]C[+57.0215]QAADK/2	ARP-Plasma:ARP-OxHSA
mzspec:PXD023738:S4_19_48_43.mzXML:scan:10208:AAFTEC[+57.0215]C[+57.0215]QAADK/2	ARP-Plasma:ARP-OxHSA
mzspec:PXD023738:S4_19_48_49.mzXML:scan:323:AAFTEC[+57.0215]C[+57.0215]QAADK/2	ARP-Plasma:ARP-OxHSA
mzspec:PXD023738:S4_19_48_41.mzXML:scan:9106:AAFTEC[+57.0215]C[+57.0215]QAADK/2	ARP-Plasma:ARP-OxHSA
mzspec:PXD023738:S4_19_48_40.mzXML:scan:9064:AAFTEC[+57.0215]C[+57.0215]QAADK/2	ARP-Plasma:ARP-OxHSA
mzspec:PXD023738:S4_19_48_45.mzXML:scan:8981:AAFTEC[+57.0215]C[+57.0215]QAADK/2	ARP-Plasma:ARP-OxHSA
mzspec:PXD023738:S4_19_48_44.mzXML:scan:9027:AAFTEC[+57.0215]C[+57.0215]QAADK/2	ARP-Plasma:ARP-OxHSA
mzspec:PXD023738:S4_19_48_40.mzXML:scan:9221:AAFTEC[+57.0215]C[+57.0215]QAADK/2	ARP-Plasma:ARP-OxHSA
mzspec:PXD023738:S4_19_48_46.mzXML:scan:333:AAFTEC[+57.0215]C[+57.0215]QAADK/2	ARP-Plasma:ARP-OxHSA
mzspec:PXD023738:S4_19_48_43.mzXML:scan:3838:ETYGEMADC[+57.0215]C[+57.0215]AK/2	ARP-Plasma:ARP-OxHSA
mzspec:PXD023738:S4_19_48_43.mzXML:scan:329:ETYGEMADC[+57.0215]C[+57.0215]AK/2	ARP-Plasma:ARP-OxHSA
mzspec:PXD023738:S4_19_48_40.mzXML:scan:4068:ETYGEMADC[+57.0215]C[+57.0215]AK/2	ARP-Plasma:ARP-OxHSA
mzspec:PXD023738:S4_19_48_42.mzXML:scan:3927:ETYGEMADC[+57.0215]C[+57.0215]AK/2	ARP-Plasma:ARP-OxHSA
mzspec:PXD023738:S4_19_48_44.mzXML:scan:3897:ETYGEMADC[+57.0215]C[+57.0215]AK/2	ARP-Plasma:ARP-OxHSA
mzspec:PXD023738:S4_19_48_43.mzXML:scan:3522:ETYGEMADC[+57.0215]C[+57.0215]AK/2	ARP-Plasma:ARP-OxHSA
mzspec:PXD023738:S4_19_48_45.mzXML:scan:3900:ETYGEMADC[+57.0215]C[+57.0215]AK/2	ARP-Plasma:ARP-OxHSA
mzspec:PXD023738:S4_19_48_40.mzXML:scan:4050:ETYGEMADC[+57.0215]C[+57.0215]AK/2	ARP-Plasma:ARP-OxHSA
mzspec:PXD023738:S4_19_48_41.mzXML:scan:3916:ETYGEMADC[+57.0215]C[+57.0215]AK/2	ARP-Plasma:ARP-OxHSA
mzspec:PXD023738:S4_19_48_45.mzXML:scan:338:ETYGEMADC[+57.0215]C[+57.0215]AK/2	ARP-Plasma:ARP-OxHSA
mzspec:PXD023738:S4_19_48_44.mzXML:scan:327:ETYGEMADC[+57.0215]C[+57.0215]AK/2	ARP-Plasma:ARP-OxHSA
mzspec:PXD023738:S4_19_48_45.mzXML:scan:3591:ETYGEMADC[+57.0215]C[+57.0215]AK/2	ARP-Plasma:ARP-OxHSA
mzspec:PXD023738:S4_19_48_40.mzXML:scan:3814:ETYGEMADC[+57.0215]C[+57.0215]AK/2	ARP-Plasma:ARP-OxHSA
mzspec:PXD023738:S4_19_48_46.mzXML:scan:331:ETYGEMADC[+57.0215]C[+57.0215]AK/2	ARP-Plasma:ARP-OxHSA
mzspec:PXD023738:S4_19_48_44.mzXML:scan:3573:ETYGEMADC[+57.0215]C[+57.0215]AK/2	ARP-Plasma:ARP-OxHSA
mzspec:PXD023738:S4_19_48_41.mzXML:scan:331:ETYGEMADC[+57.0215]C[+57.0215]AK/2	ARP-Plasma:ARP-OxHSA
mzspec:PXD023738:S4_19_48_47.mzXML:scan:3202:ETYGEMADC[+57.0215]C[+57.0215]AK/2	ARP-Plasma:ARP-OxHSA
mzspec:PXD023738:S4_19_48_46.mzXML:scan:3235:ETYGEMADC[+57.0215]C[+57.0215]AK/2	ARP-Plasma:ARP-OxHSA
mzspec:PXD023738:S4_19_48_48.mzXML:scan:3260:ETYGEMADC[+57.0215]C[+57.0215]AK/2	ARP-Plasma:ARP-OxHSA
mzspec:PXD023738:S4_19_48_49.mzXML:scan:3331:ETYGEMADC[+57.0215]C[+57.0215]AK/2	ARP-Plasma:ARP-OxHSA
mzspec:PXD023738:S4_19_48_41.mzXML:scan:3605:ETYGEMADC[+57.0215]C[+57.0215]AK/2	ARP-Plasma:ARP-OxHSA
mzspec:PXD023738:S4_19_48_42.mzXML:scan:3597:ETYGEMADC[+57.0215]C[+57.0215]AK/2	ARP-Plasma:ARP-OxHSA
mzspec:PXD023738:S4_19_48_43.mzXML:scan:8914:ETYGEMADC[+57.0215]C[+57.0215]AK/2	ARP-Plasma:ARP-OxHSA
mzspec:PXD023738:S4_19_48_40.mzXML:scan:9161:ETYGEMADC[+57.0215]C[+57.0215]AK/2	ARP-Plasma:ARP-OxHSA
mzspec:PXD023738:S4_19_48_47.mzXML:scan:317:ETYGEMADC[+57.0215]C[+57.0215]AK/2	ARP-Plasma:ARP-OxHSA
mzspec:PXD023738:S4_19_48_42.mzXML:scan:9137:ETYGEMADC[+57.0215]C[+57.0215]AK/2	ARP-Plasma:ARP-OxHSA
mzspec:PXD023738:S4_19_48_50.mzXML:scan:3383:ETYGEMADC[+57.0215]C[+57.0215]AK/2	ARP-Plasma:ARP-OxHSA
mzspec:PXD023738:S4_19_48_45.mzXML:scan:6528:ETYGEMADC[+57.0215]C[+57.0215]AK/2	ARP-Plasma:ARP-OxHSA
mzspec:PXD023738:S4_19_48_40.mzXML:scan:9071:ETYGEMADC[+57.0215]C[+57.0215]AK/2	ARP-Plasma:ARP-OxHSA
mzspec:PXD023738:S4_19_48_45.mzXML:scan:8987:ETYGEMADC[+57.0215]C[+57.0215]AK/2	ARP-Plasma:ARP-OxHSA
mzspec:PXD023738:S4_19_48_45.mzXML:scan:7228:ETYGEMADC[+57.0215]C[+57.0215]AK/2	ARP-Plasma:ARP-OxHSA
mzspec:PXD023738:S4_19_48_41.mzXML:scan:9199:ETYGEMADC[+57.0215]C[+57.0215]AK/2	ARP-Plasma:ARP-OxHSA
mzspec:PXD023738:S4_19_48_40.mzXML:scan:9152:ETYGEMADC[+57.0215]C[+57.0215]AK/2	ARP-Plasma:ARP-OxHSA
mzspec:PXD023738:S4_19_48_44.mzXML:scan:6594:ETYGEMADC[+57.0215]C[+57.0215]AK/2	ARP-Plasma:ARP-OxHSA
mzspec:PXD023738:S4_19_48_44.mzXML:scan:7549:ETYGEMADC[+57.0215]C[+57.0215]AK/2	ARP-Plasma:ARP-OxHSA
mzspec:PXD023738:S4_19_48_44.mzXML:scan:8974:ETYGEMADC[+57.0215]C[+57.0215]AK/2	ARP-Plasma:ARP-OxHSA
mzspec:PXD023738:S4_19_48_45.mzXML:scan:6693:ETYGEMADC[+57.0215]C[+57.0215]AK/2	ARP-Plasma:ARP-OxHSA
mzspec:PXD023738:S4_19_48_44.mzXML:scan:6790:ETYGEMADC[+57.0215]C[+57.0215]AK/2	ARP-Plasma:ARP-OxHSA
mzspec:PXD023738:S4_19_48_45.mzXML:scan:7028:ETYGEMADC[+57.0215]C[+57.0215]AK/2	ARP-Plasma:ARP-OxHSA
mzspec:PXD023738:S4_19_48_45.mzXML:scan:8414:ETYGEMADC[+57.0215]C[+57.0215]AK/2	ARP-Plasma:ARP-OxHSA
mzspec:PXD023738:S4_19_48_42.mzXML:scan:6864:ETYGEMADC[+57.0215]C[+57.0215]AK/2	ARP-Plasma:ARP-OxHSA
mzspec:PXD023738:S4_19_48_45.mzXML:scan:8846:ETYGEMADC[+57.0215]C[+57.0215]AK/2	ARP-Plasma:ARP-OxHSA
mzspec:PXD023738:S4_19_48_40.mzXML:scan:9088:ETYGEMADC[+57.0215]C[+57.0215]AK/2	ARP-Plasma:ARP-OxHSA
mzspec:PXD023738:S4_19_48_42.mzXML:scan:6659:ETYGEMADC[+57.0215]C[+57.0215]AK/2	ARP-Plasma:ARP-OxHSA
mzspec:PXD023738:S4_19_48_40.mzXML:scan:9222:ETYGEMADC[+57.0215]C[+57.0215]AK/2	ARP-Plasma:ARP-OxHSA
mzspec:PXD023738:S4_19_48_45.mzXML:scan:6173:ETYGEMADC[+57.0215]C[+57.0215]AK/2	ARP-Plasma:ARP-OxHSA
mzspec:PXD023738:S4_19_48_45.mzXML:scan:7544:ETYGEMADC[+57.0215]C[+57.0215]AK/2	ARP-Plasma:ARP-OxHSA
mzspec:PXD023738:S4_19_48_44.mzXML:scan:6648:ETYGEMADC[+57.0215]C[+57.0215]AK/2	ARP-Plasma:ARP-OxHSA
mzspec:PXD023738:S4_19_48_43.mzXML:scan:8704:ETYGEMADC[+57.0215]C[+57.0215]AK/2	ARP-Plasma:ARP-OxHSA
mzspec:PXD023738:S4_19_48_44.mzXML:scan:6518:ETYGEMADC[+57.0215]C[+57.0215]AK/2	ARP-Plasma:ARP-OxHSA
mzspec:PXD023738:S4_19_48_42.mzXML:scan:8726:ETYGEMADC[+57.0215]C[+57.0215]AK/2	ARP-Plasma:ARP-OxHSA
mzspec:PXD023738:S4_19_48_40.mzXML:scan:9199:ETYGEMADC[+57.0215]C[+57.0215]AK/2	ARP-Plasma:ARP-OxHSA
mzspec:PXD023738:S4_19_48_43.mzXML:scan:7752:ETYGEMADC[+57.0215]C[+57.0215]AK/2	ARP-Plasma:ARP-OxHSA
mzspec:PXD023738:S4_19_48_43.mzXML:scan:6446:ETYGEMADC[+57.0215]C[+57.0215]AK/2	ARP-Plasma:ARP-OxHSA
mzspec:PXD023738:S4_19_48_44.mzXML:scan:8479:ETYGEMADC[+57.0215]C[+57.0215]AK/2	ARP-Plasma:ARP-OxHSA
mzspec:PXD023738:S4_19_48_45.mzXML:scan:7447:ETYGEMADC[+57.0215]C[+57.0215]AK/2	ARP-Plasma:ARP-OxHSA
mzspec:PXD023738:S4_19_48_43.mzXML:scan:9453:ETYGEMADC[+57.0215]C[+57.0215]AK/2	ARP-Plasma:ARP-OxHSA
mzspec:PXD023738:S4_19_48_42.mzXML:scan:6724:ETYGEMADC[+57.0215]C[+57.0215]AK/2	ARP-Plasma:ARP-OxHSA
mzspec:PXD023738:S4_19_48_42.mzXML:scan:7142:ETYGEMADC[+57.0215]C[+57.0215]AK/2	ARP-Plasma:ARP-OxHSA
mzspec:PXD023738:S4_19_48_44.mzXML:scan:6621:ETYGEMADC[+57.0215]C[+57.0215]AK/2	ARP-Plasma:ARP-OxHSA
mzspec:PXD023738:S4_19_48_43.mzXML:scan:7853:ETYGEMADC[+57.0215]C[+57.0215]AK/2	ARP-Plasma:ARP-OxHSA
mzspec:PXD023738:S4_19_48_43.mzXML:scan:1683:ADDKETC[+57.0215]FAEEGK/3	ARP-Plasma:ARP-OxHSA
mzspec:PXD023738:S4_19_48_45.mzXML:scan:1708:ADDKETC[+57.0215]FAEEGK/3	ARP-Plasma:ARP-OxHSA
mzspec:PXD023738:S4_19_48_41.mzXML:scan:1709:ADDKETC[+57.0215]FAEEGK/3	ARP-Plasma:ARP-OxHSA
mzspec:PXD023738:S4_19_48_42.mzXML:scan:1701:ADDKETC[+57.0215]FAEEGK/3	ARP-Plasma:ARP-OxHSA
mzspec:PXD023738:S4_19_48_40.mzXML:scan:5934:AVMDDFAAFVEK/2	ARP-Plasma:ARP-OxHSA
mzspec:PXD023738:S4_19_48_43.mzXML:scan:5776:AVMDDFAAFVEK/2	ARP-Plasma:ARP-OxHSA
mzspec:PXD023738:S4_19_48_45.mzXML:scan:5826:AVMDDFAAFVEK/2	ARP-Plasma:ARP-OxHSA
mzspec:PXD023738:S4_19_48_40.mzXML:scan:6546:AVMDDFAAFVEK/2	ARP-Plasma:ARP-OxHSA
mzspec:PXD023738:S4_19_48_44.mzXML:scan:5811:AVMDDFAAFVEK/2	ARP-Plasma:ARP-OxHSA
mzspec:PXD023738:S4_19_48_49.mzXML:scan:5193:AVMDDFAAFVEK/2	ARP-Plasma:ARP-OxHSA
mzspec:PXD023738:S4_19_48_42.mzXML:scan:5847:AVMDDFAAFVEK/2	ARP-Plasma:ARP-OxHSA
mzspec:PXD023738:S4_19_48_44.mzXML:scan:6283:AVMDDFAAFVEK/2	ARP-Plasma:ARP-OxHSA
mzspec:PXD023738:S4_19_48_47.mzXML:scan:5076:AVMDDFAAFVEK/2	ARP-Plasma:ARP-OxHSA
mzspec:PXD023738:S4_19_48_43.mzXML:scan:5658:AVMDDFAAFVEK/2	ARP-Plasma:ARP-OxHSA
mzspec:PXD023738:S4_19_48_41.mzXML:scan:5866:AVMDDFAAFVEK/2	ARP-Plasma:ARP-OxHSA
mzspec:PXD023738:S4_19_48_46.mzXML:scan:5133:AVMDDFAAFVEK/2	ARP-Plasma:ARP-OxHSA
mzspec:PXD023738:S4_19_48_48.mzXML:scan:5120:AVMDDFAAFVEK/2	ARP-Plasma:ARP-OxHSA
mzspec:PXD023738:S4_19_48_43.mzXML:scan:5462:AVMDDFAAFVEK/2	ARP-Plasma:ARP-OxHSA
mzspec:PXD023738:S4_19_48_45.mzXML:scan:5817:AVMDDFAAFVEK/3	ARP-Plasma:ARP-OxHSA
mzspec:PXD023738:S4_19_48_43.mzXML:scan:6705:AVMDDFAAFVEK/2	ARP-Plasma:ARP-OxHSA
mzspec:PXD023738:S4_19_48_42.mzXML:scan:5845:AVMDDFAAFVEK/3	ARP-Plasma:ARP-OxHSA
mzspec:PXD023738:S4_19_48_50.mzXML:scan:5259:AVMDDFAAFVEK/2	ARP-Plasma:ARP-OxHSA
mzspec:PXD023738:S4_19_48_43.mzXML:scan:5767:AVMDDFAAFVEK/3	ARP-Plasma:ARP-OxHSA
mzspec:PXD023738:S4_19_48_40.mzXML:scan:7039:AVMDDFAAFVEK/2	ARP-Plasma:ARP-OxHSA
mzspec:PXD023738:S4_19_48_42.mzXML:scan:6456:AVMDDFAAFVEK/2	ARP-Plasma:ARP-OxHSA
mzspec:PXD023738:S4_19_48_40.mzXML:scan:5881:AVMDDFAAFVEK/2	ARP-Plasma:ARP-OxHSA
mzspec:PXD023738:S4_19_48_43.mzXML:scan:6778:AVMDDFAAFVEK/2	ARP-Plasma:ARP-OxHSA
mzspec:PXD023738:S4_19_48_45.mzXML:scan:5709:AVMDDFAAFVEK/2	ARP-Plasma:ARP-OxHSA
mzspec:PXD023738:S4_19_48_43.mzXML:scan:6872:AVMDDFAAFVEK/2	ARP-Plasma:ARP-OxHSA
mzspec:PXD023738:S4_19_48_44.mzXML:scan:6166:AVMDDFAAFVEK/2	ARP-Plasma:ARP-OxHSA
mzspec:PXD023738:S4_19_48_41.mzXML:scan:6143:AVMDDFAAFVEK/2	ARP-Plasma:ARP-OxHSA
mzspec:PXD023738:S4_19_48_44.mzXML:scan:6869:AVMDDFAAFVEK/2	ARP-Plasma:ARP-OxHSA
mzspec:PXD023738:S4_19_48_44.mzXML:scan:6111:AVMDDFAAFVEK/2	ARP-Plasma:ARP-OxHSA
mzspec:PXD023738:S4_19_48_43.mzXML:scan:6337:AVMDDFAAFVEK/2	ARP-Plasma:ARP-OxHSA
mzspec:PXD023738:S4_19_48_41.mzXML:scan:5551:AVMDDFAAFVEK/2	ARP-Plasma:ARP-OxHSA
mzspec:PXD023738:S4_19_48_43.mzXML:scan:6135:AVMDDFAAFVEK/2	ARP-Plasma:ARP-OxHSA
mzspec:PXD023738:S4_19_48_41.mzXML:scan:6125:AVMDDFAAFVEK/2	ARP-Plasma:ARP-OxHSA
mzspec:PXD023738:S4_19_48_44.mzXML:scan:6265:AVMDDFAAFVEK/2	ARP-Plasma:ARP-OxHSA
mzspec:PXD023738:S4_19_48_44.mzXML:scan:6248:AVMDDFAAFVEK/2	ARP-Plasma:ARP-OxHSA
mzspec:PXD023738:S4_19_48_44.mzXML:scan:6341:AVMDDFAAFVEK/2	ARP-Plasma:ARP-OxHSA
mzspec:PXD023738:S4_19_48_45.mzXML:scan:6645:AVMDDFAAFVEK/2	ARP-Plasma:ARP-OxHSA
mzspec:PXD023738:S4_19_48_44.mzXML:scan:6147:AVMDDFAAFVEK/2	ARP-Plasma:ARP-OxHSA
mzspec:PXD023738:S4_19_48_43.mzXML:scan:6155:AVMDDFAAFVEK/2	ARP-Plasma:ARP-OxHSA
mzspec:PXD023738:S4_19_48_41.mzXML:scan:6220:AVMDDFAAFVEK/2	ARP-Plasma:ARP-OxHSA
mzspec:PXD023738:S4_19_48_41.mzXML:scan:5755:AVMDDFAAFVEK/2	ARP-Plasma:ARP-OxHSA
mzspec:PXD023738:S4_19_48_42.mzXML:scan:6219:AVMDDFAAFVEK/2	ARP-Plasma:ARP-OxHSA
mzspec:PXD023738:S4_19_48_42.mzXML:scan:5734:AVMDDFAAFVEK/2	ARP-Plasma:ARP-OxHSA
mzspec:PXD023738:S4_19_48_42.mzXML:scan:6201:AVMDDFAAFVEK/2	ARP-Plasma:ARP-OxHSA
mzspec:PXD023738:S4_19_48_45.mzXML:scan:6127:AVMDDFAAFVEK/2	ARP-Plasma:ARP-OxHSA
mzspec:PXD023738:S4_19_48_42.mzXML:scan:6675:AVMDDFAAFVEK/2	ARP-Plasma:ARP-OxHSA
mzspec:PXD023738:S4_19_48_45.mzXML:scan:6266:AVMDDFAAFVEK/2	ARP-Plasma:ARP-OxHSA
mzspec:PXD023738:S4_19_48_43.mzXML:scan:6404:AVMDDFAAFVEK/2	ARP-Plasma:ARP-OxHSA
mzspec:PXD023738:S4_19_48_45.mzXML:scan:6121:AVMDDFAAFVEK/2	ARP-Plasma:ARP-OxHSA
mzspec:PXD023738:S4_19_48_41.mzXML:scan:6234:AVMDDFAAFVEK/2	ARP-Plasma:ARP-OxHSA
mzspec:PXD023738:S4_19_48_43.mzXML:scan:6761:AVMDDFAAFVEK/2	ARP-Plasma:ARP-OxHSA
mzspec:PXD023738:S4_19_48_42.mzXML:scan:5778:AVMDDFAAFVEK/2	ARP-Plasma:ARP-OxHSA
mzspec:PXD023738:S4_19_48_42.mzXML:scan:6238:AVMDDFAAFVEK/2	ARP-Plasma:ARP-OxHSA
mzspec:PXD023738:S4_19_48_41.mzXML:scan:6437:AVMDDFAAFVEK/2	ARP-Plasma:ARP-OxHSA
mzspec:PXD023738:S4_19_48_44.mzXML:scan:6188:AVMDDFAAFVEK/2	ARP-Plasma:ARP-OxHSA
mzspec:PXD023738:S4_19_48_43.mzXML:scan:6177:AVMDDFAAFVEK/2	ARP-Plasma:ARP-OxHSA
mzspec:PXD023738:S4_19_48_45.mzXML:scan:5517:AVMDDFAAFVEK/2	ARP-Plasma:ARP-OxHSA
mzspec:PXD023738:S4_19_48_45.mzXML:scan:6144:AVMDDFAAFVEK/2	ARP-Plasma:ARP-OxHSA
mzspec:PXD023738:S4_19_48_43.mzXML:scan:6239:AVMDDFAAFVEK/2	ARP-Plasma:ARP-OxHSA
mzspec:PXD023738:S4_19_48_44.mzXML:scan:6129:AVMDDFAAFVEK/2	ARP-Plasma:ARP-OxHSA
mzspec:PXD023738:S4_19_48_40.mzXML:scan:6496:AVMDDFAAFVEK/2	ARP-Plasma:ARP-OxHSA
mzspec:PXD023738:S4_19_48_45.mzXML:scan:6166:AVMDDFAAFVEK/2	ARP-Plasma:ARP-OxHSA
mzspec:PXD023738:S4_19_48_42.mzXML:scan:6438:AVMDDFAAFVEK/2	ARP-Plasma:ARP-OxHSA
mzspec:PXD023738:S4_19_48_45.mzXML:scan:6445:AVMDDFAAFVEK/2	ARP-Plasma:ARP-OxHSA
mzspec:PXD023738:S4_19_48_41.mzXML:scan:6168:AVMDDFAAFVEK/2	ARP-Plasma:ARP-OxHSA
mzspec:PXD023738:S4_19_48_45.mzXML:scan:6187:AVMDDFAAFVEK/2	ARP-Plasma:ARP-OxHSA
mzspec:PXD023738:S4_19_48_44.mzXML:scan:6900:AVMDDFAAFVEK/2	ARP-Plasma:ARP-OxHSA
mzspec:PXD023738:S4_19_48_40.mzXML:scan:6477:AVMDDFAAFVEK/2	ARP-Plasma:ARP-OxHSA
mzspec:PXD023738:S4_19_48_44.mzXML:scan:6194:AVMDDFAAFVEK/2	ARP-Plasma:ARP-OxHSA
mzspec:PXD023738:S4_19_48_43.mzXML:scan:6255:AVMDDFAAFVEK/2	ARP-Plasma:ARP-OxHSA
mzspec:PXD023738:S4_19_48_44.mzXML:scan:5490:AVMDDFAAFVEK/2	ARP-Plasma:ARP-OxHSA
mzspec:PXD023738:S4_19_48_41.mzXML:scan:6186:AVMDDFAAFVEK/2	ARP-Plasma:ARP-OxHSA
mzspec:PXD023738:S4_19_48_44.mzXML:scan:6356:AVMDDFAAFVEK/2	ARP-Plasma:ARP-OxHSA
mzspec:PXD023738:S4_19_48_45.mzXML:scan:6385:AVMDDFAAFVEK/2	ARP-Plasma:ARP-OxHSA
mzspec:PXD023738:S4_19_48_45.mzXML:scan:6239:AVMDDFAAFVEK/2	ARP-Plasma:ARP-OxHSA
mzspec:PXD023738:S4_19_48_40.mzXML:scan:6389:AVMDDFAAFVEK/2	ARP-Plasma:ARP-OxHSA
mzspec:PXD023738:S4_19_48_43.mzXML:scan:6602:AVMDDFAAFVEK/2	ARP-Plasma:ARP-OxHSA
mzspec:PXD023738:S4_19_48_44.mzXML:scan:6213:AVMDDFAAFVEK/2	ARP-Plasma:ARP-OxHSA
mzspec:PXD023738:S4_19_48_40.mzXML:scan:6418:AVMDDFAAFVEK/2	ARP-Plasma:ARP-OxHSA
mzspec:PXD023738:S4_19_48_44.mzXML:scan:6261:AVMDDFAAFVEK/2	ARP-Plasma:ARP-OxHSA
mzspec:PXD023738:S4_19_48_43.mzXML:scan:6287:AVMDDFAAFVEK/2	ARP-Plasma:ARP-OxHSA
mzspec:PXD023738:S4_19_48_41.mzXML:scan:6755:AVMDDFAAFVEK/2	ARP-Plasma:ARP-OxHSA
mzspec:PXD023738:S4_19_48_42.mzXML:scan:6353:AVMDDFAAFVEK/2	ARP-Plasma:ARP-OxHSA
mzspec:PXD023738:S4_19_48_40.mzXML:scan:5631:AVMDDFAAFVEK/2	ARP-Plasma:ARP-OxHSA
mzspec:PXD023738:S4_19_48_42.mzXML:scan:6297:AVMDDFAAFVEK/2	ARP-Plasma:ARP-OxHSA
mzspec:PXD023738:S4_19_48_43.mzXML:scan:6219:AVMDDFAAFVEK/2	ARP-Plasma:ARP-OxHSA
mzspec:PXD023738:S4_19_48_41.mzXML:scan:6276:AVMDDFAAFVEK/2	ARP-Plasma:ARP-OxHSA
mzspec:PXD023738:S4_19_48_44.mzXML:scan:6424:AVMDDFAAFVEK/2	ARP-Plasma:ARP-OxHSA
mzspec:PXD023738:S4_19_48_44.mzXML:scan:6617:AVMDDFAAFVEK/2	ARP-Plasma:ARP-OxHSA
mzspec:PXD023738:S4_19_48_43.mzXML:scan:6322:AVMDDFAAFVEK/2	ARP-Plasma:ARP-OxHSA
mzspec:PXD023738:S4_19_48_41.mzXML:scan:6262:AVMDDFAAFVEK/2	ARP-Plasma:ARP-OxHSA
mzspec:PXD023738:S4_19_48_46.mzXML:scan:5014:AVMDDFAAFVEK/2	ARP-Plasma:ARP-OxHSA
mzspec:PXD023738:S4_19_48_40.mzXML:scan:7104:AVMDDFAAFVEK/2	ARP-Plasma:ARP-OxHSA
mzspec:PXD023738:S4_19_48_41.mzXML:scan:5802:AVMDDFAAFVEK/2	ARP-Plasma:ARP-OxHSA
mzspec:PXD023738:S4_19_48_44.mzXML:scan:6178:AVMDDFAAFVEK/2	ARP-Plasma:ARP-OxHSA
mzspec:PXD023738:S4_19_48_45.mzXML:scan:6332:AVMDDFAAFVEK/2	ARP-Plasma:ARP-OxHSA
mzspec:PXD023738:S4_19_48_45.mzXML:scan:6408:AVMDDFAAFVEK/2	ARP-Plasma:ARP-OxHSA
mzspec:PXD023738:S4_19_48_43.mzXML:scan:6696:AVMDDFAAFVEK/2	ARP-Plasma:ARP-OxHSA
mzspec:PXD023738:S4_19_48_43.mzXML:scan:6651:AVMDDFAAFVEK/2	ARP-Plasma:ARP-OxHSA
mzspec:PXD023738:S4_19_48_40.mzXML:scan:9104:AVMDDFAAFVEK/2	ARP-Plasma:ARP-OxHSA
mzspec:PXD023738:S4_19_48_40.mzXML:scan:6528:AVMDDFAAFVEK/2	ARP-Plasma:ARP-OxHSA
mzspec:PXD023738:S4_19_48_44.mzXML:scan:6364:AVMDDFAAFVEK/2	ARP-Plasma:ARP-OxHSA
mzspec:PXD023738:S4_19_48_40.mzXML:scan:6742:AVMDDFAAFVEK/2	ARP-Plasma:ARP-OxHSA
mzspec:PXD023738:S4_19_48_43.mzXML:scan:6304:AVMDDFAAFVEK/2	ARP-Plasma:ARP-OxHSA
mzspec:PXD023738:S4_19_48_41.mzXML:scan:6348:AVMDDFAAFVEK/2	ARP-Plasma:ARP-OxHSA
mzspec:PXD023738:S4_19_48_43.mzXML:scan:6353:AVMDDFAAFVEK/2	ARP-Plasma:ARP-OxHSA
mzspec:PXD023738:S4_19_48_43.mzXML:scan:7149:AVMDDFAAFVEK/2	ARP-Plasma:ARP-OxHSA
mzspec:PXD023738:S4_19_48_42.mzXML:scan:6370:AVMDDFAAFVEK/2	ARP-Plasma:ARP-OxHSA
mzspec:PXD023738:S4_19_48_40.mzXML:scan:6343:AVMDDFAAFVEK/2	ARP-Plasma:ARP-OxHSA
mzspec:PXD023738:S4_19_48_42.mzXML:scan:6473:AVMDDFAAFVEK/2	ARP-Plasma:ARP-OxHSA
mzspec:PXD023738:S4_19_48_41.mzXML:scan:6258:AVMDDFAAFVEK/2	ARP-Plasma:ARP-OxHSA
mzspec:PXD023738:S4_19_48_45.mzXML:scan:6312:AVMDDFAAFVEK/2	ARP-Plasma:ARP-OxHSA
mzspec:PXD023738:S4_19_48_41.mzXML:scan:6940:AVMDDFAAFVEK/2	ARP-Plasma:ARP-OxHSA
mzspec:PXD023738:S4_19_48_43.mzXML:scan:6372:AVMDDFAAFVEK/2	ARP-Plasma:ARP-OxHSA
mzspec:PXD023738:S4_19_48_40.mzXML:scan:6573:AVMDDFAAFVEK/2	ARP-Plasma:ARP-OxHSA
mzspec:PXD023738:S4_19_48_40.mzXML:scan:6411:AVMDDFAAFVEK/2	ARP-Plasma:ARP-OxHSA
mzspec:PXD023738:S4_19_48_42.mzXML:scan:6257:AVMDDFAAFVEK/2	ARP-Plasma:ARP-OxHSA
mzspec:PXD023738:S4_19_48_41.mzXML:scan:6315:AVMDDFAAFVEK/2	ARP-Plasma:ARP-OxHSA
mzspec:PXD023738:S4_19_48_42.mzXML:scan:6329:AVMDDFAAFVEK/2	ARP-Plasma:ARP-OxHSA
mzspec:PXD023738:S4_19_48_45.mzXML:scan:6350:AVMDDFAAFVEK/2	ARP-Plasma:ARP-OxHSA
mzspec:PXD023738:S4_19_48_45.mzXML:scan:6220:AVMDDFAAFVEK/2	ARP-Plasma:ARP-OxHSA
mzspec:PXD023738:S4_19_48_44.mzXML:scan:6322:AVMDDFAAFVEK/2	ARP-Plasma:ARP-OxHSA
mzspec:PXD023738:S4_19_48_40.mzXML:scan:6405:AVMDDFAAFVEK/2	ARP-Plasma:ARP-OxHSA
mzspec:PXD023738:S4_19_48_45.mzXML:scan:6370:AVMDDFAAFVEK/2	ARP-Plasma:ARP-OxHSA
mzspec:PXD023738:S4_19_48_45.mzXML:scan:6392:AVMDDFAAFVEK/2	ARP-Plasma:ARP-OxHSA
mzspec:PXD023738:S4_19_48_45.mzXML:scan:6203:AVMDDFAAFVEK/2	ARP-Plasma:ARP-OxHSA
mzspec:PXD023738:S4_19_48_41.mzXML:scan:6421:AVMDDFAAFVEK/2	ARP-Plasma:ARP-OxHSA
mzspec:PXD023738:S4_19_48_42.mzXML:scan:6388:AVMDDFAAFVEK/2	ARP-Plasma:ARP-OxHSA
mzspec:PXD023738:S4_19_48_42.mzXML:scan:6315:AVMDDFAAFVEK/2	ARP-Plasma:ARP-OxHSA
mzspec:PXD023738:S4_19_48_40.mzXML:scan:6440:AVMDDFAAFVEK/2	ARP-Plasma:ARP-OxHSA
mzspec:PXD023738:S4_19_48_44.mzXML:scan:7157:AVMDDFAAFVEK/2	ARP-Plasma:ARP-OxHSA
mzspec:PXD023738:S4_19_48_42.mzXML:scan:6929:AVMDDFAAFVEK/2	ARP-Plasma:ARP-OxHSA
mzspec:PXD023738:S4_19_48_41.mzXML:scan:9210:AVMDDFAAFVEK/2	ARP-Plasma:ARP-OxHSA
mzspec:PXD023738:S4_19_48_45.mzXML:scan:6626:AVMDDFAAFVEK/2	ARP-Plasma:ARP-OxHSA
mzspec:PXD023738:S4_19_48_41.mzXML:scan:9354:AVMDDFAAFVEK/2	ARP-Plasma:ARP-OxHSA
mzspec:PXD023738:S4_19_48_42.mzXML:scan:9167:AVMDDFAAFVEK/2	ARP-Plasma:ARP-OxHSA
mzspec:PXD023738:S4_19_48_45.mzXML:scan:6329:AVMDDFAAFVEK/2	ARP-Plasma:ARP-OxHSA
mzspec:PXD023738:S4_19_48_44.mzXML:scan:6403:AVMDDFAAFVEK/2	ARP-Plasma:ARP-OxHSA
mzspec:PXD023738:S4_19_48_42.mzXML:scan:5797:AVMDDFAAFVEK/2	ARP-Plasma:ARP-OxHSA
mzspec:PXD023738:S4_19_48_42.mzXML:scan:6689:AVMDDFAAFVEK/2	ARP-Plasma:ARP-OxHSA
mzspec:PXD023738:S4_19_48_45.mzXML:scan:9055:AVMDDFAAFVEK/2	ARP-Plasma:ARP-OxHSA
mzspec:PXD023738:S4_19_48_45.mzXML:scan:6283:AVMDDFAAFVEK/2	ARP-Plasma:ARP-OxHSA
mzspec:PXD023738:S4_19_48_40.mzXML:scan:6435:AVMDDFAAFVEK/2	ARP-Plasma:ARP-OxHSA
mzspec:PXD023738:S4_19_48_43.mzXML:scan:6411:AVMDDFAAFVEK/2	ARP-Plasma:ARP-OxHSA
mzspec:PXD023738:S4_19_48_42.mzXML:scan:6995:AVMDDFAAFVEK/2	ARP-Plasma:ARP-OxHSA
mzspec:PXD023738:S4_19_48_45.mzXML:scan:6813:AVMDDFAAFVEK/2	ARP-Plasma:ARP-OxHSA
mzspec:PXD023738:S4_19_48_44.mzXML:scan:8960:AVMDDFAAFVEK/2	ARP-Plasma:ARP-OxHSA
mzspec:PXD023738:S4_19_48_40.mzXML:scan:6829:AVMDDFAAFVEK/2	ARP-Plasma:ARP-OxHSA
mzspec:PXD023738:S4_19_48_40.mzXML:scan:7315:AVMDDFAAFVEK/2	ARP-Plasma:ARP-OxHSA
mzspec:PXD023738:S4_19_48_40.mzXML:scan:9194:AVMDDFAAFVEK/2	ARP-Plasma:ARP-OxHSA
mzspec:PXD023738:S4_19_48_43.mzXML:scan:6803:AVMDDFAAFVEK/2	ARP-Plasma:ARP-OxHSA
mzspec:PXD023738:S4_19_48_42.mzXML:scan:7530:AVMDDFAAFVEK/2	ARP-Plasma:ARP-OxHSA
mzspec:PXD023738:S4_19_48_43.mzXML:scan:6913:AVMDDFAAFVEK/2	ARP-Plasma:ARP-OxHSA
mzspec:PXD023738:S4_19_48_42.mzXML:scan:6848:AVMDDFAAFVEK/2	ARP-Plasma:ARP-OxHSA
mzspec:PXD023738:S4_19_48_41.mzXML:scan:6400:AVMDDFAAFVEK/2	ARP-Plasma:ARP-OxHSA
mzspec:PXD023738:S4_19_48_42.mzXML:scan:6429:AVMDDFAAFVEK/2	ARP-Plasma:ARP-OxHSA
mzspec:PXD023738:S4_19_48_45.mzXML:scan:6344:AVMDDFAAFVEK/2	ARP-Plasma:ARP-OxHSA
mzspec:PXD023738:S4_19_48_41.mzXML:scan:7144:AVMDDFAAFVEK/2	ARP-Plasma:ARP-OxHSA
mzspec:PXD023738:S4_19_48_43.mzXML:scan:8762:AVMDDFAAFVEK/2	ARP-Plasma:ARP-OxHSA
mzspec:PXD023738:S4_19_48_44.mzXML:scan:6931:AVMDDFAAFVEK/2	ARP-Plasma:ARP-OxHSA
mzspec:PXD023738:S4_19_48_44.mzXML:scan:6385:AVMDDFAAFVEK/2	ARP-Plasma:ARP-OxHSA
mzspec:PXD023738:S4_19_48_41.mzXML:scan:9374:AVMDDFAAFVEK/2	ARP-Plasma:ARP-OxHSA
mzspec:PXD023738:S4_19_48_41.mzXML:scan:6384:AVMDDFAAFVEK/2	ARP-Plasma:ARP-OxHSA
mzspec:PXD023738:S4_19_48_44.mzXML:scan:9079:AVMDDFAAFVEK/2	ARP-Plasma:ARP-OxHSA
mzspec:PXD023738:S4_19_48_41.mzXML:scan:6801:AVMDDFAAFVEK/2	ARP-Plasma:ARP-OxHSA
mzspec:PXD023738:S4_19_48_41.mzXML:scan:9239:AVMDDFAAFVEK/2	ARP-Plasma:ARP-OxHSA
mzspec:PXD023738:S4_19_48_42.mzXML:scan:6608:AVMDDFAAFVEK/2	ARP-Plasma:ARP-OxHSA
mzspec:PXD023738:S4_19_48_41.mzXML:scan:6488:AVMDDFAAFVEK/2	ARP-Plasma:ARP-OxHSA
mzspec:PXD023738:S4_19_48_41.mzXML:scan:6443:AVMDDFAAFVEK/2	ARP-Plasma:ARP-OxHSA
mzspec:PXD023738:S4_19_48_42.mzXML:scan:6817:AVMDDFAAFVEK/2	ARP-Plasma:ARP-OxHSA
mzspec:PXD023738:S4_19_48_43.mzXML:scan:6389:AVMDDFAAFVEK/2	ARP-Plasma:ARP-OxHSA
mzspec:PXD023738:S4_19_48_42.mzXML:scan:6656:AVMDDFAAFVEK/2	ARP-Plasma:ARP-OxHSA
mzspec:PXD023738:S4_19_48_43.mzXML:scan:6554:AVMDDFAAFVEK/2	ARP-Plasma:ARP-OxHSA
mzspec:PXD023738:S4_19_48_43.mzXML:scan:9155:AVMDDFAAFVEK/2	ARP-Plasma:ARP-OxHSA
mzspec:PXD023738:S4_19_48_41.mzXML:scan:7435:AVMDDFAAFVEK/2	ARP-Plasma:ARP-OxHSA
mzspec:PXD023738:S4_19_48_43.mzXML:scan:6583:AVMDDFAAFVEK/2	ARP-Plasma:ARP-OxHSA
mzspec:PXD023738:S4_19_48_42.mzXML:scan:6796:AVMDDFAAFVEK/2	ARP-Plasma:ARP-OxHSA
mzspec:PXD023738:S4_19_48_40.mzXML:scan:6458:AVMDDFAAFVEK/2	ARP-Plasma:ARP-OxHSA
mzspec:PXD023738:S4_19_48_41.mzXML:scan:6912:AVMDDFAAFVEK/2	ARP-Plasma:ARP-OxHSA
mzspec:PXD023738:S4_19_48_43.mzXML:scan:6633:AVMDDFAAFVEK/2	ARP-Plasma:ARP-OxHSA
mzspec:PXD023738:S4_19_48_41.mzXML:scan:6332:AVMDDFAAFVEK/2	ARP-Plasma:ARP-OxHSA
mzspec:PXD023738:S4_19_48_41.mzXML:scan:6719:AVMDDFAAFVEK/2	ARP-Plasma:ARP-OxHSA
mzspec:PXD023738:S4_19_48_42.mzXML:scan:6484:AVMDDFAAFVEK/2	ARP-Plasma:ARP-OxHSA
mzspec:PXD023738:S4_19_48_43.mzXML:scan:7530:AVMDDFAAFVEK/2	ARP-Plasma:ARP-OxHSA
mzspec:PXD023738:S4_19_48_42.mzXML:scan:6707:AVMDDFAAFVEK/2	ARP-Plasma:ARP-OxHSA
mzspec:PXD023738:S4_19_48_43.mzXML:scan:6737:AVMDDFAAFVEK/2	ARP-Plasma:ARP-OxHSA
mzspec:PXD023738:S4_19_48_43.mzXML:scan:9123:AVMDDFAAFVEK/2	ARP-Plasma:ARP-OxHSA
mzspec:PXD023738:S4_19_48_43.mzXML:scan:6674:AVMDDFAAFVEK/2	ARP-Plasma:ARP-OxHSA
mzspec:PXD023738:S4_19_48_41.mzXML:scan:9309:AVMDDFAAFVEK/2	ARP-Plasma:ARP-OxHSA
mzspec:PXD023738:S4_19_48_41.mzXML:scan:6469:AVMDDFAAFVEK/2	ARP-Plasma:ARP-OxHSA
mzspec:PXD023738:S4_19_48_45.mzXML:scan:6726:AVMDDFAAFVEK/2	ARP-Plasma:ARP-OxHSA
mzspec:PXD023738:S4_19_48_44.mzXML:scan:8780:AVMDDFAAFVEK/2	ARP-Plasma:ARP-OxHSA
mzspec:PXD023738:S4_19_48_41.mzXML:scan:6773:AVMDDFAAFVEK/2	ARP-Plasma:ARP-OxHSA
mzspec:PXD023738:S4_19_48_44.mzXML:scan:7266:AVMDDFAAFVEK/2	ARP-Plasma:ARP-OxHSA
mzspec:PXD023738:S4_19_48_41.mzXML:scan:9294:AVMDDFAAFVEK/2	ARP-Plasma:ARP-OxHSA
mzspec:PXD023738:S4_19_48_44.mzXML:scan:6447:AVMDDFAAFVEK/2	ARP-Plasma:ARP-OxHSA
mzspec:PXD023738:S4_19_48_41.mzXML:scan:6820:AVMDDFAAFVEK/2	ARP-Plasma:ARP-OxHSA
mzspec:PXD023738:S4_19_48_40.mzXML:scan:6767:AVMDDFAAFVEK/2	ARP-Plasma:ARP-OxHSA
mzspec:PXD023738:S4_19_48_44.mzXML:scan:6400:AVMDDFAAFVEK/2	ARP-Plasma:ARP-OxHSA
mzspec:PXD023738:S4_19_48_45.mzXML:scan:6610:AVMDDFAAFVEK/2	ARP-Plasma:ARP-OxHSA
mzspec:PXD023738:S4_19_48_42.mzXML:scan:6950:AVMDDFAAFVEK/2	ARP-Plasma:ARP-OxHSA
mzspec:PXD023738:S4_19_48_40.mzXML:scan:6855:AVMDDFAAFVEK/2	ARP-Plasma:ARP-OxHSA
mzspec:PXD023738:S4_19_48_41.mzXML:scan:6687:AVMDDFAAFVEK/2	ARP-Plasma:ARP-OxHSA
mzspec:PXD023738:S4_19_48_41.mzXML:scan:8949:AVMDDFAAFVEK/2	ARP-Plasma:ARP-OxHSA
mzspec:PXD023738:S4_19_48_43.mzXML:scan:6955:AVMDDFAAFVEK/2	ARP-Plasma:ARP-OxHSA
mzspec:PXD023738:S4_19_48_40.mzXML:scan:8299:AVMDDFAAFVEK/2	ARP-Plasma:ARP-OxHSA
mzspec:PXD023738:S4_19_48_42.mzXML:scan:9309:AVMDDFAAFVEK/2	ARP-Plasma:ARP-OxHSA
mzspec:PXD023738:S4_19_48_45.mzXML:scan:8647:AVMDDFAAFVEK/2	ARP-Plasma:ARP-OxHSA
mzspec:PXD023738:S4_19_48_40.mzXML:scan:7238:AVMDDFAAFVEK/2	ARP-Plasma:ARP-OxHSA
mzspec:PXD023738:S4_19_48_42.mzXML:scan:6764:AVMDDFAAFVEK/2	ARP-Plasma:ARP-OxHSA
mzspec:PXD023738:S4_19_48_40.mzXML:scan:6785:AVMDDFAAFVEK/2	ARP-Plasma:ARP-OxHSA
mzspec:PXD023738:S4_19_48_44.mzXML:scan:9098:AVMDDFAAFVEK/2	ARP-Plasma:ARP-OxHSA
mzspec:PXD023738:S4_19_48_43.mzXML:scan:1621:C[+57.0215]C[+57.0215]AAADPHEC[+57.0215]YAK/3	ARP-Plasma:ARP-OxHSA
mzspec:PXD023738:S4_19_48_40.mzXML:scan:1649:C[+57.0215]C[+57.0215]AAADPHEC[+57.0215]YAK/3	ARP-Plasma:ARP-OxHSA
mzspec:PXD023738:S4_19_48_45.mzXML:scan:1643:C[+57.0215]C[+57.0215]AAADPHEC[+57.0215]YAK/3	ARP-Plasma:ARP-OxHSA
mzspec:PXD023738:S4_19_48_43.mzXML:scan:1622:C[+57.0215]C[+57.0215]AAADPHEC[+57.0215]YAK/2	ARP-Plasma:ARP-OxHSA
mzspec:PXD023738:S4_19_48_44.mzXML:scan:1625:C[+57.0215]C[+57.0215]AAADPHEC[+57.0215]YAK/2	ARP-Plasma:ARP-OxHSA
mzspec:PXD023738:S4_19_48_42.mzXML:scan:1632:C[+57.0215]C[+57.0215]AAADPHEC[+57.0215]YAK/3	ARP-Plasma:ARP-OxHSA
mzspec:PXD023738:S4_19_48_44.mzXML:scan:1621:C[+57.0215]C[+57.0215]AAADPHEC[+57.0215]YAK/3	ARP-Plasma:ARP-OxHSA
mzspec:PXD023738:S4_19_48_42.mzXML:scan:1634:C[+57.0215]C[+57.0215]AAADPHEC[+57.0215]YAK/2	ARP-Plasma:ARP-OxHSA
mzspec:PXD023738:S4_19_48_41.mzXML:scan:1637:C[+57.0215]C[+57.0215]AAADPHEC[+57.0215]YAK/3	ARP-Plasma:ARP-OxHSA
mzspec:PXD023738:S4_19_48_46.mzXML:scan:324:C[+57.0215]C[+57.0215]AAADPHEC[+57.0215]YAK/3	ARP-Plasma:ARP-OxHSA
mzspec:PXD023738:S4_19_48_44.mzXML:scan:321:C[+57.0215]C[+57.0215]AAADPHEC[+57.0215]YAK/3	ARP-Plasma:ARP-OxHSA
mzspec:PXD023738:S4_19_48_41.mzXML:scan:1645:C[+57.0215]C[+57.0215]AAADPHEC[+57.0215]YAK/2	ARP-Plasma:ARP-OxHSA
mzspec:PXD023738:S4_19_48_40.mzXML:scan:1658:C[+57.0215]C[+57.0215]AAADPHEC[+57.0215]YAK/2	ARP-Plasma:ARP-OxHSA
mzspec:PXD023738:S4_19_48_42.mzXML:scan:1641:C[+57.0215]C[+57.0215]AAADPHEC[+57.0215]YAK/2	ARP-Plasma:ARP-OxHSA
mzspec:PXD023738:S4_19_48_43.mzXML:scan:4948:VPQVSTPTLVEVSR/2	ARP-Plasma:ARP-OxHSA
mzspec:PXD023738:S4_19_48_40.mzXML:scan:5112:VPQVSTPTLVEVSR/2	ARP-Plasma:ARP-OxHSA
mzspec:PXD023738:S4_19_48_44.mzXML:scan:4965:VPQVSTPTLVEVSR/2	ARP-Plasma:ARP-OxHSA
mzspec:PXD023738:S4_19_48_42.mzXML:scan:5019:VPQVSTPTLVEVSR/2	ARP-Plasma:ARP-OxHSA
mzspec:PXD023738:S4_19_48_45.mzXML:scan:4986:VPQVSTPTLVEVSR/2	ARP-Plasma:ARP-OxHSA
mzspec:PXD023738:S4_19_48_42.mzXML:scan:4991:VPQVSTPTLVEVSR/2	ARP-Plasma:ARP-OxHSA
mzspec:PXD023738:S4_19_48_40.mzXML:scan:5107:VPQVSTPTLVEVSR/3	ARP-Plasma:ARP-OxHSA
mzspec:PXD023738:S4_19_48_43.mzXML:scan:4940:VPQVSTPTLVEVSR/3	ARP-Plasma:ARP-OxHSA
mzspec:PXD023738:S4_19_48_45.mzXML:scan:4987:VPQVSTPTLVEVSR/3	ARP-Plasma:ARP-OxHSA
mzspec:PXD023738:S4_19_48_41.mzXML:scan:5026:VPQVSTPTLVEVSR/2	ARP-Plasma:ARP-OxHSA
mzspec:PXD023738:S4_19_48_42.mzXML:scan:5004:VPQVSTPTLVEVSR/3	ARP-Plasma:ARP-OxHSA
mzspec:PXD023738:S4_19_48_44.mzXML:scan:4962:VPQVSTPTLVEVSR/3	ARP-Plasma:ARP-OxHSA
mzspec:PXD023738:S4_19_48_41.mzXML:scan:5022:VPQVSTPTLVEVSR/3	ARP-Plasma:ARP-OxHSA
mzspec:PXD023738:S4_19_48_47.mzXML:scan:4263:VPQVSTPTLVEVSR/2	ARP-Plasma:ARP-OxHSA
mzspec:PXD023738:S4_19_48_40.mzXML:scan:5163:VPQVSTPTLVEVSR/2	ARP-Plasma:ARP-OxHSA
mzspec:PXD023738:S4_19_48_48.mzXML:scan:4316:VPQVSTPTLVEVSR/2	ARP-Plasma:ARP-OxHSA
mzspec:PXD023738:S4_19_48_46.mzXML:scan:4299:VPQVSTPTLVEVSR/2	ARP-Plasma:ARP-OxHSA
mzspec:PXD023738:S4_19_48_49.mzXML:scan:4384:VPQVSTPTLVEVSR/2	ARP-Plasma:ARP-OxHSA
mzspec:PXD023738:S4_19_48_50.mzXML:scan:4453:VPQVSTPTLVEVSR/2	ARP-Plasma:ARP-OxHSA
mzspec:PXD023738:S4_19_48_43.mzXML:scan:3356:ETYGEM[+15.9949]ADC[+57.0215]C[+57.0215]AK/2	ARP-Plasma:ARP-OxHSA
mzspec:PXD023738:S4_19_48_44.mzXML:scan:1638:ETYGEM[+15.9949]ADC[+57.0215]C[+57.0215]AK/2	ARP-Plasma:ARP-OxHSA
mzspec:PXD023738:S4_19_48_45.mzXML:scan:3463:ETYGEM[+15.9949]ADC[+57.0215]C[+57.0215]AK/2	ARP-Plasma:ARP-OxHSA
mzspec:PXD023738:S4_19_48_43.mzXML:scan:3775:ETYGEM[+15.9949]ADC[+57.0215]C[+57.0215]AK/2	ARP-Plasma:ARP-OxHSA
mzspec:PXD023738:S4_19_48_45.mzXML:scan:3320:ETYGEM[+15.9949]ADC[+57.0215]C[+57.0215]AK/2	ARP-Plasma:ARP-OxHSA
mzspec:PXD023738:S4_19_48_45.mzXML:scan:3838:ETYGEM[+15.9949]ADC[+57.0215]C[+57.0215]AK/2	ARP-Plasma:ARP-OxHSA
mzspec:PXD023738:S4_19_48_41.mzXML:scan:323:ETYGEM[+15.9949]ADC[+57.0215]C[+57.0215]AK/2	ARP-Plasma:ARP-OxHSA
mzspec:PXD023738:S4_19_48_43.mzXML:scan:1640:ETYGEM[+15.9949]ADC[+57.0215]C[+57.0215]AK/2	ARP-Plasma:ARP-OxHSA
mzspec:PXD023738:S4_19_48_41.mzXML:scan:3269:ETYGEM[+15.9949]ADC[+57.0215]C[+57.0215]AK/2	ARP-Plasma:ARP-OxHSA
mzspec:PXD023738:S4_19_48_42.mzXML:scan:1644:ETYGEM[+15.9949]ADC[+57.0215]C[+57.0215]AK/2	ARP-Plasma:ARP-OxHSA
mzspec:PXD023738:S4_19_48_45.mzXML:scan:1655:ETYGEM[+15.9949]ADC[+57.0215]C[+57.0215]AK/2	ARP-Plasma:ARP-OxHSA
mzspec:PXD023738:S4_19_48_44.mzXML:scan:319:ETYGEM[+15.9949]ADC[+57.0215]C[+57.0215]AK/2	ARP-Plasma:ARP-OxHSA
mzspec:PXD023738:S4_19_48_45.mzXML:scan:3338:ETYGEM[+15.9949]ADC[+57.0215]C[+57.0215]AK/2	ARP-Plasma:ARP-OxHSA
mzspec:PXD023738:S4_19_48_42.mzXML:scan:3423:ETYGEM[+15.9949]ADC[+57.0215]C[+57.0215]AK/2	ARP-Plasma:ARP-OxHSA
mzspec:PXD023738:S4_19_48_43.mzXML:scan:3154:ETYGEM[+15.9949]ADC[+57.0215]C[+57.0215]AK/2	ARP-Plasma:ARP-OxHSA
mzspec:PXD023738:S4_19_48_45.mzXML:scan:3812:ETYGEM[+15.9949]ADC[+57.0215]C[+57.0215]AK/2	ARP-Plasma:ARP-OxHSA
mzspec:PXD023738:S4_19_48_45.mzXML:scan:3596:ETYGEM[+15.9949]ADC[+57.0215]C[+57.0215]AK/2	ARP-Plasma:ARP-OxHSA
mzspec:PXD023738:S4_19_48_43.mzXML:scan:3739:ETYGEM[+15.9949]ADC[+57.0215]C[+57.0215]AK/2	ARP-Plasma:ARP-OxHSA
mzspec:PXD023738:S4_19_48_45.mzXML:scan:3443:ETYGEM[+15.9949]ADC[+57.0215]C[+57.0215]AK/2	ARP-Plasma:ARP-OxHSA
mzspec:PXD023738:S4_19_48_45.mzXML:scan:3480:ETYGEM[+15.9949]ADC[+57.0215]C[+57.0215]AK/2	ARP-Plasma:ARP-OxHSA
mzspec:PXD023738:S4_19_48_45.mzXML:scan:3742:ETYGEM[+15.9949]ADC[+57.0215]C[+57.0215]AK/2	ARP-Plasma:ARP-OxHSA
mzspec:PXD023738:S4_19_48_45.mzXML:scan:3403:ETYGEM[+15.9949]ADC[+57.0215]C[+57.0215]AK/2	ARP-Plasma:ARP-OxHSA
mzspec:PXD023738:S4_19_48_45.mzXML:scan:3652:ETYGEM[+15.9949]ADC[+57.0215]C[+57.0215]AK/2	ARP-Plasma:ARP-OxHSA
mzspec:PXD023738:S4_19_48_44.mzXML:scan:3421:ETYGEM[+15.9949]ADC[+57.0215]C[+57.0215]AK/2	ARP-Plasma:ARP-OxHSA
mzspec:PXD023738:S4_19_48_45.mzXML:scan:3631:ETYGEM[+15.9949]ADC[+57.0215]C[+57.0215]AK/2	ARP-Plasma:ARP-OxHSA
mzspec:PXD023738:S4_19_48_45.mzXML:scan:3408:ETYGEM[+15.9949]ADC[+57.0215]C[+57.0215]AK/2	ARP-Plasma:ARP-OxHSA
mzspec:PXD023738:S4_19_48_45.mzXML:scan:3541:ETYGEM[+15.9949]ADC[+57.0215]C[+57.0215]AK/2	ARP-Plasma:ARP-OxHSA
mzspec:PXD023738:S4_19_48_45.mzXML:scan:3427:ETYGEM[+15.9949]ADC[+57.0215]C[+57.0215]AK/2	ARP-Plasma:ARP-OxHSA
mzspec:PXD023738:S4_19_48_49.mzXML:scan:317:ETYGEM[+15.9949]ADC[+57.0215]C[+57.0215]AK/2	ARP-Plasma:ARP-OxHSA
mzspec:PXD023738:S4_19_48_45.mzXML:scan:3386:ETYGEM[+15.9949]ADC[+57.0215]C[+57.0215]AK/2	ARP-Plasma:ARP-OxHSA
mzspec:PXD023738:S4_19_48_40.mzXML:scan:4022:ETYGEM[+15.9949]ADC[+57.0215]C[+57.0215]AK/2	ARP-Plasma:ARP-OxHSA
mzspec:PXD023738:S4_19_48_43.mzXML:scan:322:ETYGEM[+15.9949]ADC[+57.0215]C[+57.0215]AK/2	ARP-Plasma:ARP-OxHSA
mzspec:PXD023738:S4_19_48_45.mzXML:scan:3758:ETYGEM[+15.9949]ADC[+57.0215]C[+57.0215]AK/2	ARP-Plasma:ARP-OxHSA
mzspec:PXD023738:S4_19_48_45.mzXML:scan:3285:ETYGEM[+15.9949]ADC[+57.0215]C[+57.0215]AK/2	ARP-Plasma:ARP-OxHSA
mzspec:PXD023738:S4_19_48_41.mzXML:scan:1649:ETYGEM[+15.9949]ADC[+57.0215]C[+57.0215]AK/2	ARP-Plasma:ARP-OxHSA
mzspec:PXD023738:S4_19_48_45.mzXML:scan:3578:ETYGEM[+15.9949]ADC[+57.0215]C[+57.0215]AK/2	ARP-Plasma:ARP-OxHSA
mzspec:PXD023738:S4_19_48_40.mzXML:scan:3621:ETYGEM[+15.9949]ADC[+57.0215]C[+57.0215]AK/2	ARP-Plasma:ARP-OxHSA
mzspec:PXD023738:S4_19_48_45.mzXML:scan:3366:ETYGEM[+15.9949]ADC[+57.0215]C[+57.0215]AK/2	ARP-Plasma:ARP-OxHSA
mzspec:PXD023738:S4_19_48_45.mzXML:scan:3326:ETYGEM[+15.9949]ADC[+57.0215]C[+57.0215]AK/2	ARP-Plasma:ARP-OxHSA
mzspec:PXD023738:S4_19_48_45.mzXML:scan:3612:ETYGEM[+15.9949]ADC[+57.0215]C[+57.0215]AK/2	ARP-Plasma:ARP-OxHSA
mzspec:PXD023738:S4_19_48_45.mzXML:scan:3763:ETYGEM[+15.9949]ADC[+57.0215]C[+57.0215]AK/2	ARP-Plasma:ARP-OxHSA
mzspec:PXD023738:S4_19_48_45.mzXML:scan:3505:ETYGEM[+15.9949]ADC[+57.0215]C[+57.0215]AK/2	ARP-Plasma:ARP-OxHSA
mzspec:PXD023738:S4_19_48_41.mzXML:scan:3856:ETYGEM[+15.9949]ADC[+57.0215]C[+57.0215]AK/2	ARP-Plasma:ARP-OxHSA
mzspec:PXD023738:S4_19_48_46.mzXML:scan:325:ETYGEM[+15.9949]ADC[+57.0215]C[+57.0215]AK/2	ARP-Plasma:ARP-OxHSA
mzspec:PXD023738:S4_19_48_45.mzXML:scan:3560:ETYGEM[+15.9949]ADC[+57.0215]C[+57.0215]AK/2	ARP-Plasma:ARP-OxHSA
mzspec:PXD023738:S4_19_48_45.mzXML:scan:3919:ETYGEM[+15.9949]ADC[+57.0215]C[+57.0215]AK/2	ARP-Plasma:ARP-OxHSA
mzspec:PXD023738:S4_19_48_42.mzXML:scan:3267:ETYGEM[+15.9949]ADC[+57.0215]C[+57.0215]AK/2	ARP-Plasma:ARP-OxHSA
mzspec:PXD023738:S4_19_48_45.mzXML:scan:332:ETYGEM[+15.9949]ADC[+57.0215]C[+57.0215]AK/2	ARP-Plasma:ARP-OxHSA
mzspec:PXD023738:S4_19_48_45.mzXML:scan:3302:ETYGEM[+15.9949]ADC[+57.0215]C[+57.0215]AK/2	ARP-Plasma:ARP-OxHSA
mzspec:PXD023738:S4_19_48_45.mzXML:scan:3357:ETYGEM[+15.9949]ADC[+57.0215]C[+57.0215]AK/2	ARP-Plasma:ARP-OxHSA
mzspec:PXD023738:S4_19_48_40.mzXML:scan:1666:ETYGEM[+15.9949]ADC[+57.0215]C[+57.0215]AK/2	ARP-Plasma:ARP-OxHSA
mzspec:PXD023738:S4_19_48_45.mzXML:scan:3246:ETYGEM[+15.9949]ADC[+57.0215]C[+57.0215]AK/2	ARP-Plasma:ARP-OxHSA
mzspec:PXD023738:S4_19_48_45.mzXML:scan:3523:ETYGEM[+15.9949]ADC[+57.0215]C[+57.0215]AK/2	ARP-Plasma:ARP-OxHSA
mzspec:PXD023738:S4_19_48_48.mzXML:scan:312:ETYGEM[+15.9949]ADC[+57.0215]C[+57.0215]AK/2	ARP-Plasma:ARP-OxHSA
mzspec:PXD023738:S4_19_48_47.mzXML:scan:312:ETYGEM[+15.9949]ADC[+57.0215]C[+57.0215]AK/2	ARP-Plasma:ARP-OxHSA
mzspec:PXD023738:S4_19_48_41.mzXML:scan:2905:ETYGEM[+15.9949]ADC[+57.0215]C[+57.0215]AK/2	ARP-Plasma:ARP-OxHSA
mzspec:PXD023738:S4_19_48_43.mzXML:scan:5116:RPC[+57.0215]FSALEVDETYVPK/3	ARP-Plasma:ARP-OxHSA
mzspec:PXD023738:S4_19_48_43.mzXML:scan:5098:RPC[+57.0215]FSALEVDETYVPK/3	ARP-Plasma:ARP-OxHSA
mzspec:PXD023738:S4_19_48_43.mzXML:scan:5135:RPC[+57.0215]FSALEVDETYVPK/3	ARP-Plasma:ARP-OxHSA
mzspec:PXD023738:S4_19_48_40.mzXML:scan:5242:RPC[+57.0215]FSALEVDETYVPK/3	ARP-Plasma:ARP-OxHSA
mzspec:PXD023738:S4_19_48_45.mzXML:scan:5125:RPC[+57.0215]FSALEVDETYVPK/3	ARP-Plasma:ARP-OxHSA
mzspec:PXD023738:S4_19_48_40.mzXML:scan:5256:RPC[+57.0215]FSALEVDETYVPK/3	ARP-Plasma:ARP-OxHSA
mzspec:PXD023738:S4_19_48_40.mzXML:scan:5311:RPC[+57.0215]FSALEVDETYVPK/3	ARP-Plasma:ARP-OxHSA
mzspec:PXD023738:S4_19_48_40.mzXML:scan:5293:RPC[+57.0215]FSALEVDETYVPK/3	ARP-Plasma:ARP-OxHSA
mzspec:PXD023738:S4_19_48_42.mzXML:scan:5163:RPC[+57.0215]FSALEVDETYVPK/3	ARP-Plasma:ARP-OxHSA
mzspec:PXD023738:S4_19_48_44.mzXML:scan:5121:RPC[+57.0215]FSALEVDETYVPK/3	ARP-Plasma:ARP-OxHSA
mzspec:PXD023738:S4_19_48_48.mzXML:scan:4432:RPC[+57.0215]FSALEVDETYVPK/3	ARP-Plasma:ARP-OxHSA
mzspec:PXD023738:S4_19_48_47.mzXML:scan:4407:RPC[+57.0215]FSALEVDETYVPK/3	ARP-Plasma:ARP-OxHSA
mzspec:PXD023738:S4_19_48_41.mzXML:scan:5170:RPC[+57.0215]FSALEVDETYVPK/3	ARP-Plasma:ARP-OxHSA
mzspec:PXD023738:S4_19_48_49.mzXML:scan:4504:RPC[+57.0215]FSALEVDETYVPK/3	ARP-Plasma:ARP-OxHSA
mzspec:PXD023738:S4_19_48_46.mzXML:scan:4421:RPC[+57.0215]FSALEVDETYVPK/3	ARP-Plasma:ARP-OxHSA
mzspec:PXD023738:S4_19_48_50.mzXML:scan:4590:RPC[+57.0215]FSALEVDETYVPK/3	ARP-Plasma:ARP-OxHSA
mzspec:PXD023738:S4_19_48_45.mzXML:scan:5143:RPC[+57.0215]FSALEVDETYVPK/2	ARP-Plasma:ARP-OxHSA
mzspec:PXD023738:S4_19_48_43.mzXML:scan:5099:RPC[+57.0215]FSALEVDETYVPK/2	ARP-Plasma:ARP-OxHSA
mzspec:PXD023738:S4_19_48_44.mzXML:scan:5115:RPC[+57.0215]FSALEVDETYVPK/2	ARP-Plasma:ARP-OxHSA
mzspec:PXD023738:S4_19_48_40.mzXML:scan:5262:RPC[+57.0215]FSALEVDETYVPK/2	ARP-Plasma:ARP-OxHSA
mzspec:PXD023738:S4_19_48_41.mzXML:scan:5176:RPC[+57.0215]FSALEVDETYVPK/2	ARP-Plasma:ARP-OxHSA
mzspec:PXD023738:S4_19_48_42.mzXML:scan:5151:RPC[+57.0215]FSALEVDETYVPK/2	ARP-Plasma:ARP-OxHSA
mzspec:PXD023738:S4_19_48_46.mzXML:scan:4430:RPC[+57.0215]FSALEVDETYVPK/2	ARP-Plasma:ARP-OxHSA
mzspec:PXD023738:S4_19_48_47.mzXML:scan:4399:RPC[+57.0215]FSALEVDETYVPK/2	ARP-Plasma:ARP-OxHSA
mzspec:PXD023738:S4_19_48_50.mzXML:scan:4585:RPC[+57.0215]FSALEVDETYVPK/2	ARP-Plasma:ARP-OxHSA
mzspec:PXD023738:S4_19_48_41.mzXML:scan:9175:RPC[+57.0215]FSALEVDETYVPK/3	ARP-Plasma:ARP-OxHSA
mzspec:PXD023738:S4_19_48_42.mzXML:scan:7091:RPC[+57.0215]FSALEVDETYVPK/3	ARP-Plasma:ARP-OxHSA
mzspec:PXD023738:S4_19_48_40.mzXML:scan:9010:RPC[+57.0215]FSALEVDETYVPK/3	ARP-Plasma:ARP-OxHSA
mzspec:PXD023738:S4_19_48_49.mzXML:scan:4517:RPC[+57.0215]FSALEVDETYVPK/2	ARP-Plasma:ARP-OxHSA
mzspec:PXD023738:S4_19_48_44.mzXML:scan:6197:RPC[+57.0215]FSALEVDETYVPK/3	ARP-Plasma:ARP-OxHSA
mzspec:PXD023738:S4_19_48_45.mzXML:scan:6045:RPC[+57.0215]FSALEVDETYVPK/3	ARP-Plasma:ARP-OxHSA
mzspec:PXD023738:S4_19_48_40.mzXML:scan:6878:RPC[+57.0215]FSALEVDETYVPK/3	ARP-Plasma:ARP-OxHSA
mzspec:PXD023738:S4_19_48_43.mzXML:scan:7047:DVFLGMFLYEYAR/2	ARP-Plasma:ARP-OxHSA
mzspec:PXD023738:S4_19_48_40.mzXML:scan:7295:DVFLGMFLYEYAR/2	ARP-Plasma:ARP-OxHSA
mzspec:PXD023738:S4_19_48_44.mzXML:scan:7061:DVFLGMFLYEYAR/2	ARP-Plasma:ARP-OxHSA
mzspec:PXD023738:S4_19_48_41.mzXML:scan:7212:DVFLGMFLYEYAR/2	ARP-Plasma:ARP-OxHSA
mzspec:PXD023738:S4_19_48_45.mzXML:scan:7128:DVFLGMFLYEYAR/2	ARP-Plasma:ARP-OxHSA
mzspec:PXD023738:S4_19_48_42.mzXML:scan:7153:DVFLGMFLYEYAR/2	ARP-Plasma:ARP-OxHSA
mzspec:PXD023738:S4_19_48_40.mzXML:scan:5442:QNC[+57.0215]ELFEQLGEYK/2	ARP-Plasma:ARP-OxHSA
mzspec:PXD023738:S4_19_48_45.mzXML:scan:5329:QNC[+57.0215]ELFEQLGEYK/2	ARP-Plasma:ARP-OxHSA
mzspec:PXD023738:S4_19_48_44.mzXML:scan:5476:QNC[+57.0215]ELFEQLGEYK/2	ARP-Plasma:ARP-OxHSA
mzspec:PXD023738:S4_19_48_49.mzXML:scan:4779:QNC[+57.0215]ELFEQLGEYK/2	ARP-Plasma:ARP-OxHSA
mzspec:PXD023738:S4_19_48_42.mzXML:scan:5469:QNC[+57.0215]ELFEQLGEYK/2	ARP-Plasma:ARP-OxHSA
mzspec:PXD023738:S4_19_48_44.mzXML:scan:5307:QNC[+57.0215]ELFEQLGEYK/2	ARP-Plasma:ARP-OxHSA
mzspec:PXD023738:S4_19_48_42.mzXML:scan:5343:QNC[+57.0215]ELFEQLGEYK/2	ARP-Plasma:ARP-OxHSA
mzspec:PXD023738:S4_19_48_40.mzXML:scan:5592:QNC[+57.0215]ELFEQLGEYK/2	ARP-Plasma:ARP-OxHSA
mzspec:PXD023738:S4_19_48_43.mzXML:scan:5278:QNC[+57.0215]ELFEQLGEYK/2	ARP-Plasma:ARP-OxHSA
mzspec:PXD023738:S4_19_48_41.mzXML:scan:5501:QNC[+57.0215]ELFEQLGEYK/2	ARP-Plasma:ARP-OxHSA
mzspec:PXD023738:S4_19_48_47.mzXML:scan:4665:QNC[+57.0215]ELFEQLGEYK/2	ARP-Plasma:ARP-OxHSA
mzspec:PXD023738:S4_19_48_41.mzXML:scan:5368:QNC[+57.0215]ELFEQLGEYK/2	ARP-Plasma:ARP-OxHSA
mzspec:PXD023738:S4_19_48_45.mzXML:scan:5516:QNC[+57.0215]ELFEQLGEYK/2	ARP-Plasma:ARP-OxHSA
mzspec:PXD023738:S4_19_48_48.mzXML:scan:4696:QNC[+57.0215]ELFEQLGEYK/2	ARP-Plasma:ARP-OxHSA
mzspec:PXD023738:S4_19_48_43.mzXML:scan:6451:QNC[+57.0215]ELFEQLGEYK/2	ARP-Plasma:ARP-OxHSA
mzspec:PXD023738:S4_19_48_46.mzXML:scan:4690:QNC[+57.0215]ELFEQLGEYK/2	ARP-Plasma:ARP-OxHSA
mzspec:PXD023738:S4_19_48_44.mzXML:scan:5878:QNC[+57.0215]ELFEQLGEYK/2	ARP-Plasma:ARP-OxHSA
mzspec:PXD023738:S4_19_48_43.mzXML:scan:5538:QNC[+57.0215]ELFEQLGEYK/2	ARP-Plasma:ARP-OxHSA
mzspec:PXD023738:S4_19_48_43.mzXML:scan:6310:QNC[+57.0215]ELFEQLGEYK/2	ARP-Plasma:ARP-OxHSA
mzspec:PXD023738:S4_19_48_50.mzXML:scan:4847:QNC[+57.0215]ELFEQLGEYK/2	ARP-Plasma:ARP-OxHSA
mzspec:PXD023738:S4_19_48_43.mzXML:scan:6251:QNC[+57.0215]ELFEQLGEYK/2	ARP-Plasma:ARP-OxHSA
mzspec:PXD023738:S4_19_48_42.mzXML:scan:6049:QNC[+57.0215]ELFEQLGEYK/2	ARP-Plasma:ARP-OxHSA
mzspec:PXD023738:S4_19_48_45.mzXML:scan:5395:QNC[+57.0215]ELFEQLGEYK/3	ARP-Plasma:ARP-OxHSA
mzspec:PXD023738:S4_19_48_43.mzXML:scan:6489:QNC[+57.0215]ELFEQLGEYK/2	ARP-Plasma:ARP-OxHSA
mzspec:PXD023738:S4_19_48_45.mzXML:scan:5920:QNC[+57.0215]ELFEQLGEYK/2	ARP-Plasma:ARP-OxHSA
mzspec:PXD023738:S4_19_48_42.mzXML:scan:5407:QNC[+57.0215]ELFEQLGEYK/3	ARP-Plasma:ARP-OxHSA
mzspec:PXD023738:S4_19_48_44.mzXML:scan:5387:QNC[+57.0215]ELFEQLGEYK/3	ARP-Plasma:ARP-OxHSA
mzspec:PXD023738:S4_19_48_40.mzXML:scan:5506:QNC[+57.0215]ELFEQLGEYK/3	ARP-Plasma:ARP-OxHSA
mzspec:PXD023738:S4_19_48_43.mzXML:scan:6471:QNC[+57.0215]ELFEQLGEYK/2	ARP-Plasma:ARP-OxHSA
mzspec:PXD023738:S4_19_48_43.mzXML:scan:6096:QNC[+57.0215]ELFEQLGEYK/2	ARP-Plasma:ARP-OxHSA
mzspec:PXD023738:S4_19_48_41.mzXML:scan:9188:QNC[+57.0215]ELFEQLGEYK/2	ARP-Plasma:ARP-OxHSA
mzspec:PXD023738:S4_19_48_45.mzXML:scan:8923:QNC[+57.0215]ELFEQLGEYK/2	ARP-Plasma:ARP-OxHSA
mzspec:PXD023738:S4_19_48_41.mzXML:scan:5426:QNC[+57.0215]ELFEQLGEYK/3	ARP-Plasma:ARP-OxHSA
mzspec:PXD023738:S4_19_48_44.mzXML:scan:6414:QNC[+57.0215]ELFEQLGEYK/2	ARP-Plasma:ARP-OxHSA
mzspec:PXD023738:S4_19_48_40.mzXML:scan:6003:QNC[+57.0215]ELFEQLGEYK/2	ARP-Plasma:ARP-OxHSA
mzspec:PXD023738:S4_19_48_40.mzXML:scan:5859:QNC[+57.0215]ELFEQLGEYK/2	ARP-Plasma:ARP-OxHSA
mzspec:PXD023738:S4_19_48_41.mzXML:scan:6225:QNC[+57.0215]ELFEQLGEYK/2	ARP-Plasma:ARP-OxHSA
mzspec:PXD023738:S4_19_48_45.mzXML:scan:6549:QNC[+57.0215]ELFEQLGEYK/2	ARP-Plasma:ARP-OxHSA
mzspec:PXD023738:S4_19_48_44.mzXML:scan:5860:QNC[+57.0215]ELFEQLGEYK/2	ARP-Plasma:ARP-OxHSA
mzspec:PXD023738:S4_19_48_43.mzXML:scan:8910:QNC[+57.0215]ELFEQLGEYK/2	ARP-Plasma:ARP-OxHSA
mzspec:PXD023738:S4_19_48_45.mzXML:scan:5902:QNC[+57.0215]ELFEQLGEYK/2	ARP-Plasma:ARP-OxHSA
mzspec:PXD023738:S4_19_48_43.mzXML:scan:6391:QNC[+57.0215]ELFEQLGEYK/2	ARP-Plasma:ARP-OxHSA
mzspec:PXD023738:S4_19_48_45.mzXML:scan:5938:QNC[+57.0215]ELFEQLGEYK/2	ARP-Plasma:ARP-OxHSA
mzspec:PXD023738:S4_19_48_44.mzXML:scan:8046:QNC[+57.0215]ELFEQLGEYK/2	ARP-Plasma:ARP-OxHSA
mzspec:PXD023738:S4_19_48_44.mzXML:scan:5897:QNC[+57.0215]ELFEQLGEYK/2	ARP-Plasma:ARP-OxHSA
mzspec:PXD023738:S4_19_48_43.mzXML:scan:5342:QNC[+57.0215]ELFEQLGEYK/3	ARP-Plasma:ARP-OxHSA
mzspec:PXD023738:S4_19_48_43.mzXML:scan:6407:QNC[+57.0215]ELFEQLGEYK/2	ARP-Plasma:ARP-OxHSA
mzspec:PXD023738:S4_19_48_40.mzXML:scan:9167:QNC[+57.0215]ELFEQLGEYK/2	ARP-Plasma:ARP-OxHSA
mzspec:PXD023738:S4_19_48_40.mzXML:scan:5896:QNC[+57.0215]ELFEQLGEYK/2	ARP-Plasma:ARP-OxHSA
mzspec:PXD023738:S4_19_48_45.mzXML:scan:6381:QNC[+57.0215]ELFEQLGEYK/2	ARP-Plasma:ARP-OxHSA
mzspec:PXD023738:S4_19_48_43.mzXML:scan:6614:QNC[+57.0215]ELFEQLGEYK/2	ARP-Plasma:ARP-OxHSA
mzspec:PXD023738:S4_19_48_41.mzXML:scan:5441:QNC[+57.0215]ELFEQLGEYK/3	ARP-Plasma:ARP-OxHSA
mzspec:PXD023738:S4_19_48_44.mzXML:scan:8999:QNC[+57.0215]ELFEQLGEYK/2	ARP-Plasma:ARP-OxHSA
mzspec:PXD023738:S4_19_48_44.mzXML:scan:9117:QNC[+57.0215]ELFEQLGEYK/2	ARP-Plasma:ARP-OxHSA
mzspec:PXD023738:S4_19_48_45.mzXML:scan:6116:QNC[+57.0215]ELFEQLGEYK/2	ARP-Plasma:ARP-OxHSA
mzspec:PXD023738:S4_19_48_45.mzXML:scan:6328:QNC[+57.0215]ELFEQLGEYK/2	ARP-Plasma:ARP-OxHSA
mzspec:PXD023738:S4_19_48_40.mzXML:scan:6213:QNC[+57.0215]ELFEQLGEYK/2	ARP-Plasma:ARP-OxHSA
mzspec:PXD023738:S4_19_48_42.mzXML:scan:5773:QNC[+57.0215]ELFEQLGEYK/2	ARP-Plasma:ARP-OxHSA
mzspec:PXD023738:S4_19_48_45.mzXML:scan:9002:QNC[+57.0215]ELFEQLGEYK/2	ARP-Plasma:ARP-OxHSA
mzspec:PXD023738:S4_19_48_41.mzXML:scan:5844:QNC[+57.0215]ELFEQLGEYK/2	ARP-Plasma:ARP-OxHSA
mzspec:PXD023738:S4_19_48_44.mzXML:scan:6001:QNC[+57.0215]ELFEQLGEYK/2	ARP-Plasma:ARP-OxHSA
mzspec:PXD023738:S4_19_48_44.mzXML:scan:9246:QNC[+57.0215]ELFEQLGEYK/2	ARP-Plasma:ARP-OxHSA
mzspec:PXD023738:S4_19_48_43.mzXML:scan:6658:QNC[+57.0215]ELFEQLGEYK/2	ARP-Plasma:ARP-OxHSA
mzspec:PXD023738:S4_19_48_43.mzXML:scan:6775:QNC[+57.0215]ELFEQLGEYK/2	ARP-Plasma:ARP-OxHSA
mzspec:PXD023738:S4_19_48_43.mzXML:scan:6327:QNC[+57.0215]ELFEQLGEYK/2	ARP-Plasma:ARP-OxHSA
mzspec:PXD023738:S4_19_48_45.mzXML:scan:7148:QNC[+57.0215]ELFEQLGEYK/2	ARP-Plasma:ARP-OxHSA
mzspec:PXD023738:S4_19_48_45.mzXML:scan:6348:QNC[+57.0215]ELFEQLGEYK/2	ARP-Plasma:ARP-OxHSA
mzspec:PXD023738:S4_19_48_41.mzXML:scan:5791:QNC[+57.0215]ELFEQLGEYK/2	ARP-Plasma:ARP-OxHSA
mzspec:PXD023738:S4_19_48_41.mzXML:scan:5820:QNC[+57.0215]ELFEQLGEYK/2	ARP-Plasma:ARP-OxHSA
mzspec:PXD023738:S4_19_48_44.mzXML:scan:5939:QNC[+57.0215]ELFEQLGEYK/2	ARP-Plasma:ARP-OxHSA
mzspec:PXD023738:S4_19_48_40.mzXML:scan:6094:QNC[+57.0215]ELFEQLGEYK/2	ARP-Plasma:ARP-OxHSA
mzspec:PXD023738:S4_19_48_43.mzXML:scan:7281:QNC[+57.0215]ELFEQLGEYK/2	ARP-Plasma:ARP-OxHSA
mzspec:PXD023738:S4_19_48_45.mzXML:scan:5872:QNC[+57.0215]ELFEQLGEYK/2	ARP-Plasma:ARP-OxHSA
mzspec:PXD023738:S4_19_48_44.mzXML:scan:5976:QNC[+57.0215]ELFEQLGEYK/2	ARP-Plasma:ARP-OxHSA
mzspec:PXD023738:S4_19_48_40.mzXML:scan:6039:QNC[+57.0215]ELFEQLGEYK/2	ARP-Plasma:ARP-OxHSA
mzspec:PXD023738:S4_19_48_43.mzXML:scan:6074:QNC[+57.0215]ELFEQLGEYK/2	ARP-Plasma:ARP-OxHSA
mzspec:PXD023738:S4_19_48_43.mzXML:scan:6698:QNC[+57.0215]ELFEQLGEYK/2	ARP-Plasma:ARP-OxHSA
mzspec:PXD023738:S4_19_48_45.mzXML:scan:6046:QNC[+57.0215]ELFEQLGEYK/2	ARP-Plasma:ARP-OxHSA
mzspec:PXD023738:S4_19_48_45.mzXML:scan:6304:QNC[+57.0215]ELFEQLGEYK/2	ARP-Plasma:ARP-OxHSA
mzspec:PXD023738:S4_19_48_44.mzXML:scan:6041:QNC[+57.0215]ELFEQLGEYK/2	ARP-Plasma:ARP-OxHSA
mzspec:PXD023738:S4_19_48_42.mzXML:scan:5825:QNC[+57.0215]ELFEQLGEYK/2	ARP-Plasma:ARP-OxHSA
mzspec:PXD023738:S4_19_48_42.mzXML:scan:9133:QNC[+57.0215]ELFEQLGEYK/2	ARP-Plasma:ARP-OxHSA
mzspec:PXD023738:S4_19_48_44.mzXML:scan:6024:QNC[+57.0215]ELFEQLGEYK/2	ARP-Plasma:ARP-OxHSA
mzspec:PXD023738:S4_19_48_45.mzXML:scan:6222:QNC[+57.0215]ELFEQLGEYK/2	ARP-Plasma:ARP-OxHSA
mzspec:PXD023738:S4_19_48_44.mzXML:scan:5923:QNC[+57.0215]ELFEQLGEYK/2	ARP-Plasma:ARP-OxHSA
mzspec:PXD023738:S4_19_48_44.mzXML:scan:5953:QNC[+57.0215]ELFEQLGEYK/2	ARP-Plasma:ARP-OxHSA
mzspec:PXD023738:S4_19_48_42.mzXML:scan:5791:QNC[+57.0215]ELFEQLGEYK/2	ARP-Plasma:ARP-OxHSA
mzspec:PXD023738:S4_19_48_45.mzXML:scan:6832:QNC[+57.0215]ELFEQLGEYK/2	ARP-Plasma:ARP-OxHSA
mzspec:PXD023738:S4_19_48_45.mzXML:scan:5979:QNC[+57.0215]ELFEQLGEYK/2	ARP-Plasma:ARP-OxHSA
mzspec:PXD023738:S4_19_48_44.mzXML:scan:6133:QNC[+57.0215]ELFEQLGEYK/2	ARP-Plasma:ARP-OxHSA
mzspec:PXD023738:S4_19_48_45.mzXML:scan:5986:QNC[+57.0215]ELFEQLGEYK/2	ARP-Plasma:ARP-OxHSA
mzspec:PXD023738:S4_19_48_40.mzXML:scan:6668:QNC[+57.0215]ELFEQLGEYK/2	ARP-Plasma:ARP-OxHSA
mzspec:PXD023738:S4_19_48_43.mzXML:scan:7246:QNC[+57.0215]ELFEQLGEYK/2	ARP-Plasma:ARP-OxHSA
mzspec:PXD023738:S4_19_48_43.mzXML:scan:6182:QNC[+57.0215]ELFEQLGEYK/2	ARP-Plasma:ARP-OxHSA
mzspec:PXD023738:S4_19_48_45.mzXML:scan:6021:QNC[+57.0215]ELFEQLGEYK/2	ARP-Plasma:ARP-OxHSA
mzspec:PXD023738:S4_19_48_40.mzXML:scan:6559:QNC[+57.0215]ELFEQLGEYK/2	ARP-Plasma:ARP-OxHSA
mzspec:PXD023738:S4_19_48_43.mzXML:scan:6246:QNC[+57.0215]ELFEQLGEYK/2	ARP-Plasma:ARP-OxHSA
mzspec:PXD023738:S4_19_48_45.mzXML:scan:6157:QNC[+57.0215]ELFEQLGEYK/2	ARP-Plasma:ARP-OxHSA
mzspec:PXD023738:S4_19_48_43.mzXML:scan:6542:QNC[+57.0215]ELFEQLGEYK/2	ARP-Plasma:ARP-OxHSA
mzspec:PXD023738:S4_19_48_43.mzXML:scan:6509:QNC[+57.0215]ELFEQLGEYK/2	ARP-Plasma:ARP-OxHSA
mzspec:PXD023738:S4_19_48_43.mzXML:scan:6706:QNC[+57.0215]ELFEQLGEYK/2	ARP-Plasma:ARP-OxHSA
mzspec:PXD023738:S4_19_48_45.mzXML:scan:5811:QNC[+57.0215]ELFEQLGEYK/2	ARP-Plasma:ARP-OxHSA
mzspec:PXD023738:S4_19_48_43.mzXML:scan:6115:QNC[+57.0215]ELFEQLGEYK/2	ARP-Plasma:ARP-OxHSA
mzspec:PXD023738:S4_19_48_43.mzXML:scan:6577:QNC[+57.0215]ELFEQLGEYK/2	ARP-Plasma:ARP-OxHSA
mzspec:PXD023738:S4_19_48_43.mzXML:scan:6459:QNC[+57.0215]ELFEQLGEYK/2	ARP-Plasma:ARP-OxHSA
mzspec:PXD023738:S4_19_48_41.mzXML:scan:5814:QNC[+57.0215]ELFEQLGEYK/2	ARP-Plasma:ARP-OxHSA
mzspec:PXD023738:S4_19_48_43.mzXML:scan:6119:QNC[+57.0215]ELFEQLGEYK/2	ARP-Plasma:ARP-OxHSA
mzspec:PXD023738:S4_19_48_43.mzXML:scan:7154:QNC[+57.0215]ELFEQLGEYK/2	ARP-Plasma:ARP-OxHSA
mzspec:PXD023738:S4_19_48_44.mzXML:scan:6103:QNC[+57.0215]ELFEQLGEYK/2	ARP-Plasma:ARP-OxHSA
mzspec:PXD023738:S4_19_48_45.mzXML:scan:6378:QNC[+57.0215]ELFEQLGEYK/2	ARP-Plasma:ARP-OxHSA
mzspec:PXD023738:S4_19_48_45.mzXML:scan:6261:QNC[+57.0215]ELFEQLGEYK/2	ARP-Plasma:ARP-OxHSA
mzspec:PXD023738:S4_19_48_44.mzXML:scan:8641:QNC[+57.0215]ELFEQLGEYK/2	ARP-Plasma:ARP-OxHSA
mzspec:PXD023738:S4_19_48_43.mzXML:scan:6429:QNC[+57.0215]ELFEQLGEYK/2	ARP-Plasma:ARP-OxHSA
mzspec:PXD023738:S4_19_48_45.mzXML:scan:7295:QNC[+57.0215]ELFEQLGEYK/2	ARP-Plasma:ARP-OxHSA
mzspec:PXD023738:S4_19_48_43.mzXML:scan:6343:QNC[+57.0215]ELFEQLGEYK/2	ARP-Plasma:ARP-OxHSA
mzspec:PXD023738:S4_19_48_43.mzXML:scan:7232:QNC[+57.0215]ELFEQLGEYK/2	ARP-Plasma:ARP-OxHSA
mzspec:PXD023738:S4_19_48_43.mzXML:scan:6359:QNC[+57.0215]ELFEQLGEYK/2	ARP-Plasma:ARP-OxHSA
mzspec:PXD023738:S4_19_48_45.mzXML:scan:6279:QNC[+57.0215]ELFEQLGEYK/2	ARP-Plasma:ARP-OxHSA
mzspec:PXD023738:S4_19_48_43.mzXML:scan:6619:QNC[+57.0215]ELFEQLGEYK/2	ARP-Plasma:ARP-OxHSA
mzspec:PXD023738:S4_19_48_44.mzXML:scan:8933:QNC[+57.0215]ELFEQLGEYK/2	ARP-Plasma:ARP-OxHSA
mzspec:PXD023738:S4_19_48_45.mzXML:scan:8057:QNC[+57.0215]ELFEQLGEYK/2	ARP-Plasma:ARP-OxHSA
mzspec:PXD023738:S4_19_48_43.mzXML:scan:6230:QNC[+57.0215]ELFEQLGEYK/2	ARP-Plasma:ARP-OxHSA
mzspec:PXD023738:S4_19_48_44.mzXML:scan:7785:QNC[+57.0215]ELFEQLGEYK/2	ARP-Plasma:ARP-OxHSA
mzspec:PXD023738:S4_19_48_45.mzXML:scan:6160:QNC[+57.0215]ELFEQLGEYK/2	ARP-Plasma:ARP-OxHSA
mzspec:PXD023738:S4_19_48_43.mzXML:scan:7015:QNC[+57.0215]ELFEQLGEYK/2	ARP-Plasma:ARP-OxHSA
mzspec:PXD023738:S4_19_48_44.mzXML:scan:8463:QNC[+57.0215]ELFEQLGEYK/2	ARP-Plasma:ARP-OxHSA
mzspec:PXD023738:S4_19_48_45.mzXML:scan:6854:QNC[+57.0215]ELFEQLGEYK/2	ARP-Plasma:ARP-OxHSA
mzspec:PXD023738:S4_19_48_43.mzXML:scan:6197:QNC[+57.0215]ELFEQLGEYK/2	ARP-Plasma:ARP-OxHSA
mzspec:PXD023738:S4_19_48_43.mzXML:scan:6728:QNC[+57.0215]ELFEQLGEYK/2	ARP-Plasma:ARP-OxHSA
mzspec:PXD023738:S4_19_48_40.mzXML:scan:6379:QNC[+57.0215]ELFEQLGEYK/2	ARP-Plasma:ARP-OxHSA
mzspec:PXD023738:S4_19_48_43.mzXML:scan:6773:QNC[+57.0215]ELFEQLGEYK/2	ARP-Plasma:ARP-OxHSA
mzspec:PXD023738:S4_19_48_40.mzXML:scan:6165:QNC[+57.0215]ELFEQLGEYK/2	ARP-Plasma:ARP-OxHSA
mzspec:PXD023738:S4_19_48_45.mzXML:scan:6244:QNC[+57.0215]ELFEQLGEYK/2	ARP-Plasma:ARP-OxHSA
mzspec:PXD023738:S4_19_48_42.mzXML:scan:6861:QNC[+57.0215]ELFEQLGEYK/2	ARP-Plasma:ARP-OxHSA
mzspec:PXD023738:S4_19_48_43.mzXML:scan:6167:QNC[+57.0215]ELFEQLGEYK/2	ARP-Plasma:ARP-OxHSA
mzspec:PXD023738:S4_19_48_44.mzXML:scan:7684:QNC[+57.0215]ELFEQLGEYK/2	ARP-Plasma:ARP-OxHSA
mzspec:PXD023738:S4_19_48_43.mzXML:scan:6303:QNC[+57.0215]ELFEQLGEYK/2	ARP-Plasma:ARP-OxHSA
mzspec:PXD023738:S4_19_48_40.mzXML:scan:6260:QNC[+57.0215]ELFEQLGEYK/2	ARP-Plasma:ARP-OxHSA
mzspec:PXD023738:S4_19_48_44.mzXML:scan:7982:QNC[+57.0215]ELFEQLGEYK/2	ARP-Plasma:ARP-OxHSA
mzspec:PXD023738:S4_19_48_43.mzXML:scan:6156:QNC[+57.0215]ELFEQLGEYK/2	ARP-Plasma:ARP-OxHSA
mzspec:PXD023738:S4_19_48_43.mzXML:scan:7351:QNC[+57.0215]ELFEQLGEYK/2	ARP-Plasma:ARP-OxHSA
mzspec:PXD023738:S4_19_48_44.mzXML:scan:8794:QNC[+57.0215]ELFEQLGEYK/2	ARP-Plasma:ARP-OxHSA
mzspec:PXD023738:S4_19_48_42.mzXML:scan:6891:QNC[+57.0215]ELFEQLGEYK/2	ARP-Plasma:ARP-OxHSA
mzspec:PXD023738:S4_19_48_42.mzXML:scan:7032:QNC[+57.0215]ELFEQLGEYK/2	ARP-Plasma:ARP-OxHSA
mzspec:PXD023738:S4_19_48_44.mzXML:scan:6149:QNC[+57.0215]ELFEQLGEYK/2	ARP-Plasma:ARP-OxHSA
mzspec:PXD023738:S4_19_48_40.mzXML:scan:6361:QNC[+57.0215]ELFEQLGEYK/2	ARP-Plasma:ARP-OxHSA
mzspec:PXD023738:S4_19_48_43.mzXML:scan:6265:QNC[+57.0215]ELFEQLGEYK/2	ARP-Plasma:ARP-OxHSA
mzspec:PXD023738:S4_19_48_43.mzXML:scan:6215:QNC[+57.0215]ELFEQLGEYK/2	ARP-Plasma:ARP-OxHSA
mzspec:PXD023738:S4_19_48_44.mzXML:scan:6986:QNC[+57.0215]ELFEQLGEYK/2	ARP-Plasma:ARP-OxHSA
mzspec:PXD023738:S4_19_48_40.mzXML:scan:6406:QNC[+57.0215]ELFEQLGEYK/2	ARP-Plasma:ARP-OxHSA
mzspec:PXD023738:S4_19_48_45.mzXML:scan:7581:QNC[+57.0215]ELFEQLGEYK/2	ARP-Plasma:ARP-OxHSA
mzspec:PXD023738:S4_19_48_44.mzXML:scan:7409:QNC[+57.0215]ELFEQLGEYK/2	ARP-Plasma:ARP-OxHSA
mzspec:PXD023738:S4_19_48_41.mzXML:scan:7166:QNC[+57.0215]ELFEQLGEYK/2	ARP-Plasma:ARP-OxHSA
mzspec:PXD023738:S4_19_48_40.mzXML:scan:6808:QNC[+57.0215]ELFEQLGEYK/2	ARP-Plasma:ARP-OxHSA
mzspec:PXD023738:S4_19_48_43.mzXML:scan:9510:QNC[+57.0215]ELFEQLGEYK/2	ARP-Plasma:ARP-OxHSA
mzspec:PXD023738:S4_19_48_43.mzXML:scan:6521:QNC[+57.0215]ELFEQLGEYK/2	ARP-Plasma:ARP-OxHSA
mzspec:PXD023738:S4_19_48_45.mzXML:scan:7772:QNC[+57.0215]ELFEQLGEYK/2	ARP-Plasma:ARP-OxHSA
mzspec:PXD023738:S4_19_48_43.mzXML:scan:4270:FKDLGEENFK/3	ARP-Plasma:ARP-OxHSA
mzspec:PXD023738:S4_19_48_43.mzXML:scan:4253:FKDLGEENFK/3	ARP-Plasma:ARP-OxHSA
mzspec:PXD023738:S4_19_48_40.mzXML:scan:4452:FKDLGEENFK/3	ARP-Plasma:ARP-OxHSA
mzspec:PXD023738:S4_19_48_44.mzXML:scan:4293:FKDLGEENFK/3	ARP-Plasma:ARP-OxHSA
mzspec:PXD023738:S4_19_48_45.mzXML:scan:4314:FKDLGEENFK/3	ARP-Plasma:ARP-OxHSA
mzspec:PXD023738:S4_19_48_40.mzXML:scan:4435:FKDLGEENFK/3	ARP-Plasma:ARP-OxHSA
mzspec:PXD023738:S4_19_48_42.mzXML:scan:4347:FKDLGEENFK/3	ARP-Plasma:ARP-OxHSA
mzspec:PXD023738:S4_19_48_40.mzXML:scan:4472:FKDLGEENFK/3	ARP-Plasma:ARP-OxHSA
mzspec:PXD023738:S4_19_48_41.mzXML:scan:4331:FKDLGEENFK/3	ARP-Plasma:ARP-OxHSA
mzspec:PXD023738:S4_19_48_42.mzXML:scan:4267:FKDLGEENFK/3	ARP-Plasma:ARP-OxHSA
mzspec:PXD023738:S4_19_48_41.mzXML:scan:4368:FKDLGEENFK/3	ARP-Plasma:ARP-OxHSA
mzspec:PXD023738:S4_19_48_44.mzXML:scan:4349:FKDLGEENFK/3	ARP-Plasma:ARP-OxHSA
mzspec:PXD023738:S4_19_48_41.mzXML:scan:4348:FKDLGEENFK/3	ARP-Plasma:ARP-OxHSA
mzspec:PXD023738:S4_19_48_43.mzXML:scan:4252:FKDLGEENFK/2	ARP-Plasma:ARP-OxHSA
mzspec:PXD023738:S4_19_48_42.mzXML:scan:4329:FKDLGEENFK/2	ARP-Plasma:ARP-OxHSA
mzspec:PXD023738:S4_19_48_40.mzXML:scan:4405:FKDLGEENFK/2	ARP-Plasma:ARP-OxHSA
mzspec:PXD023738:S4_19_48_45.mzXML:scan:4315:FKDLGEENFK/2	ARP-Plasma:ARP-OxHSA
mzspec:PXD023738:S4_19_48_40.mzXML:scan:4453:FKDLGEENFK/2	ARP-Plasma:ARP-OxHSA
mzspec:PXD023738:S4_19_48_44.mzXML:scan:4294:FKDLGEENFK/2	ARP-Plasma:ARP-OxHSA
mzspec:PXD023738:S4_19_48_49.mzXML:scan:3725:FKDLGEENFK/3	ARP-Plasma:ARP-OxHSA
mzspec:PXD023738:S4_19_48_44.mzXML:scan:4245:FKDLGEENFK/2	ARP-Plasma:ARP-OxHSA
mzspec:PXD023738:S4_19_48_41.mzXML:scan:4330:FKDLGEENFK/2	ARP-Plasma:ARP-OxHSA
mzspec:PXD023738:S4_19_48_45.mzXML:scan:4342:FKDLGEENFK/2	ARP-Plasma:ARP-OxHSA
mzspec:PXD023738:S4_19_48_41.mzXML:scan:4349:FKDLGEENFK/2	ARP-Plasma:ARP-OxHSA
mzspec:PXD023738:S4_19_48_45.mzXML:scan:6298:FKDLGEENFK/3	ARP-Plasma:ARP-OxHSA
mzspec:PXD023738:S4_19_48_40.mzXML:scan:4473:FKDLGEENFK/2	ARP-Plasma:ARP-OxHSA
mzspec:PXD023738:S4_19_48_41.mzXML:scan:4370:FKDLGEENFK/2	ARP-Plasma:ARP-OxHSA
mzspec:PXD023738:S4_19_48_49.mzXML:scan:329:FKDLGEENFK/3	ARP-Plasma:ARP-OxHSA
mzspec:PXD023738:S4_19_48_45.mzXML:scan:9082:FKDLGEENFK/3	ARP-Plasma:ARP-OxHSA
mzspec:PXD023738:S4_19_48_43.mzXML:scan:7946:FKDLGEENFK/3	ARP-Plasma:ARP-OxHSA
mzspec:PXD023738:S4_19_48_44.mzXML:scan:4348:FKDLGEENFK/2	ARP-Plasma:ARP-OxHSA
mzspec:PXD023738:S4_19_48_44.mzXML:scan:9134:FKDLGEENFK/3	ARP-Plasma:ARP-OxHSA
mzspec:PXD023738:S4_19_48_41.mzXML:scan:9096:FKDLGEENFK/3	ARP-Plasma:ARP-OxHSA
mzspec:PXD023738:S4_19_48_43.mzXML:scan:6850:FKDLGEENFK/3	ARP-Plasma:ARP-OxHSA
mzspec:PXD023738:S4_19_48_45.mzXML:scan:8695:FKDLGEENFK/3	ARP-Plasma:ARP-OxHSA
mzspec:PXD023738:S4_19_48_43.mzXML:scan:8823:FKDLGEENFK/3	ARP-Plasma:ARP-OxHSA
mzspec:PXD023738:S4_19_48_43.mzXML:scan:6079:FKDLGEENFK/3	ARP-Plasma:ARP-OxHSA
mzspec:PXD023738:S4_19_48_43.mzXML:scan:4368:VHTEC[+57.0215]C[+57.0215]HGDLLEC[+57.0215]ADDRADLAK/4	ARP-Plasma:ARP-OxHSA
mzspec:PXD023738:S4_19_48_40.mzXML:scan:4543:VHTEC[+57.0215]C[+57.0215]HGDLLEC[+57.0215]ADDRADLAK/4	ARP-Plasma:ARP-OxHSA
mzspec:PXD023738:S4_19_48_44.mzXML:scan:4391:VHTEC[+57.0215]C[+57.0215]HGDLLEC[+57.0215]ADDRADLAK/4	ARP-Plasma:ARP-OxHSA
mzspec:PXD023738:S4_19_48_45.mzXML:scan:4416:VHTEC[+57.0215]C[+57.0215]HGDLLEC[+57.0215]ADDRADLAK/4	ARP-Plasma:ARP-OxHSA
mzspec:PXD023738:S4_19_48_42.mzXML:scan:4431:VHTEC[+57.0215]C[+57.0215]HGDLLEC[+57.0215]ADDRADLAK/4	ARP-Plasma:ARP-OxHSA
mzspec:PXD023738:S4_19_48_41.mzXML:scan:4457:VHTEC[+57.0215]C[+57.0215]HGDLLEC[+57.0215]ADDRADLAK/4	ARP-Plasma:ARP-OxHSA
mzspec:PXD023738:S4_19_48_44.mzXML:scan:4398:VHTEC[+57.0215]C[+57.0215]HGDLLEC[+57.0215]ADDRADLAK/5	ARP-Plasma:ARP-OxHSA
mzspec:PXD023738:S4_19_48_43.mzXML:scan:4558:C[+57.0215]TAFHDNEETFLK/2	ARP-Plasma:ARP-OxHSA
mzspec:PXD023738:S4_19_48_40.mzXML:scan:4734:C[+57.0215]TAFHDNEETFLK/2	ARP-Plasma:ARP-OxHSA
mzspec:PXD023738:S4_19_48_44.mzXML:scan:4575:C[+57.0215]TAFHDNEETFLK/2	ARP-Plasma:ARP-OxHSA
mzspec:PXD023738:S4_19_48_42.mzXML:scan:4617:C[+57.0215]TAFHDNEETFLK/2	ARP-Plasma:ARP-OxHSA
mzspec:PXD023738:S4_19_48_45.mzXML:scan:4597:C[+57.0215]TAFHDNEETFLK/2	ARP-Plasma:ARP-OxHSA
mzspec:PXD023738:S4_19_48_41.mzXML:scan:4642:C[+57.0215]TAFHDNEETFLK/2	ARP-Plasma:ARP-OxHSA
mzspec:PXD023738:S4_19_48_44.mzXML:scan:4587:C[+57.0215]TAFHDNEETFLK/3	ARP-Plasma:ARP-OxHSA
mzspec:PXD023738:S4_19_48_44.mzXML:scan:4554:C[+57.0215]TAFHDNEETFLK/3	ARP-Plasma:ARP-OxHSA
mzspec:PXD023738:S4_19_48_40.mzXML:scan:4728:C[+57.0215]TAFHDNEETFLK/3	ARP-Plasma:ARP-OxHSA
mzspec:PXD023738:S4_19_48_42.mzXML:scan:4611:C[+57.0215]TAFHDNEETFLK/3	ARP-Plasma:ARP-OxHSA
mzspec:PXD023738:S4_19_48_43.mzXML:scan:4552:C[+57.0215]TAFHDNEETFLK/3	ARP-Plasma:ARP-OxHSA
mzspec:PXD023738:S4_19_48_44.mzXML:scan:4606:C[+57.0215]TAFHDNEETFLK/3	ARP-Plasma:ARP-OxHSA
mzspec:PXD023738:S4_19_48_44.mzXML:scan:4569:C[+57.0215]TAFHDNEETFLK/3	ARP-Plasma:ARP-OxHSA
mzspec:PXD023738:S4_19_48_45.mzXML:scan:4596:C[+57.0215]TAFHDNEETFLK/3	ARP-Plasma:ARP-OxHSA
mzspec:PXD023738:S4_19_48_40.mzXML:scan:4710:C[+57.0215]TAFHDNEETFLK/3	ARP-Plasma:ARP-OxHSA
mzspec:PXD023738:S4_19_48_41.mzXML:scan:4636:C[+57.0215]TAFHDNEETFLK/3	ARP-Plasma:ARP-OxHSA
mzspec:PXD023738:S4_19_48_42.mzXML:scan:4648:C[+57.0215]TAFHDNEETFLK/3	ARP-Plasma:ARP-OxHSA
mzspec:PXD023738:S4_19_48_40.mzXML:scan:5666:C[+57.0215]TAFHDNEETFLK/2	ARP-Plasma:ARP-OxHSA
mzspec:PXD023738:S4_19_48_44.mzXML:scan:4625:C[+57.0215]TAFHDNEETFLK/3	ARP-Plasma:ARP-OxHSA
mzspec:PXD023738:S4_19_48_45.mzXML:scan:4660:C[+57.0215]TAFHDNEETFLK/3	ARP-Plasma:ARP-OxHSA
mzspec:PXD023738:S4_19_48_41.mzXML:scan:4693:C[+57.0215]TAFHDNEETFLK/3	ARP-Plasma:ARP-OxHSA
mzspec:PXD023738:S4_19_48_41.mzXML:scan:5594:C[+57.0215]TAFHDNEETFLK/2	ARP-Plasma:ARP-OxHSA
mzspec:PXD023738:S4_19_48_46.mzXML:scan:3915:C[+57.0215]TAFHDNEETFLK/3	ARP-Plasma:ARP-OxHSA
mzspec:PXD023738:S4_19_48_41.mzXML:scan:4712:C[+57.0215]TAFHDNEETFLK/3	ARP-Plasma:ARP-OxHSA
mzspec:PXD023738:S4_19_48_40.mzXML:scan:4810:C[+57.0215]TAFHDNEETFLK/3	ARP-Plasma:ARP-OxHSA
mzspec:PXD023738:S4_19_48_48.mzXML:scan:3933:C[+57.0215]TAFHDNEETFLK/3	ARP-Plasma:ARP-OxHSA
mzspec:PXD023738:S4_19_48_50.mzXML:scan:4068:C[+57.0215]TAFHDNEETFLK/3	ARP-Plasma:ARP-OxHSA
mzspec:PXD023738:S4_19_48_47.mzXML:scan:3880:C[+57.0215]TAFHDNEETFLK/3	ARP-Plasma:ARP-OxHSA
mzspec:PXD023738:S4_19_48_42.mzXML:scan:5575:C[+57.0215]TAFHDNEETFLK/2	ARP-Plasma:ARP-OxHSA
mzspec:PXD023738:S4_19_48_49.mzXML:scan:4012:C[+57.0215]TAFHDNEETFLK/3	ARP-Plasma:ARP-OxHSA
mzspec:PXD023738:S4_19_48_42.mzXML:scan:1627:TC[+57.0215]VADESAENC[+57.0215]DK/2	ARP-Plasma:ARP-OxHSA
mzspec:PXD023738:S4_19_48_45.mzXML:scan:1638:TC[+57.0215]VADESAENC[+57.0215]DK/2	ARP-Plasma:ARP-OxHSA
mzspec:PXD023738:S4_19_48_45.mzXML:scan:3398:TC[+57.0215]VADESAENC[+57.0215]DK/2	ARP-Plasma:ARP-OxHSA
mzspec:PXD023738:S4_19_48_44.mzXML:scan:1618:TC[+57.0215]VADESAENC[+57.0215]DK/2	ARP-Plasma:ARP-OxHSA
mzspec:PXD023738:S4_19_48_41.mzXML:scan:1631:TC[+57.0215]VADESAENC[+57.0215]DK/2	ARP-Plasma:ARP-OxHSA
mzspec:PXD023738:S4_19_48_43.mzXML:scan:1612:TC[+57.0215]VADESAENC[+57.0215]DK/2	ARP-Plasma:ARP-OxHSA
mzspec:PXD023738:S4_19_48_44.mzXML:scan:3379:TC[+57.0215]VADESAENC[+57.0215]DK/2	ARP-Plasma:ARP-OxHSA
mzspec:PXD023738:S4_19_48_43.mzXML:scan:323:TC[+57.0215]VADESAENC[+57.0215]DK/2	ARP-Plasma:ARP-OxHSA
mzspec:PXD023738:S4_19_48_40.mzXML:scan:3526:TC[+57.0215]VADESAENC[+57.0215]DK/2	ARP-Plasma:ARP-OxHSA
mzspec:PXD023738:S4_19_48_46.mzXML:scan:327:TC[+57.0215]VADESAENC[+57.0215]DK/2	ARP-Plasma:ARP-OxHSA
mzspec:PXD023738:S4_19_48_45.mzXML:scan:334:TC[+57.0215]VADESAENC[+57.0215]DK/2	ARP-Plasma:ARP-OxHSA
mzspec:PXD023738:S4_19_48_40.mzXML:scan:3451:TC[+57.0215]VADESAENC[+57.0215]DK/2	ARP-Plasma:ARP-OxHSA
mzspec:PXD023738:S4_19_48_43.mzXML:scan:3251:TC[+57.0215]VADESAENC[+57.0215]DK/2	ARP-Plasma:ARP-OxHSA
mzspec:PXD023738:S4_19_48_43.mzXML:scan:5188:FSALEVDETYVPK/2	ARP-Plasma:ARP-OxHSA
mzspec:PXD023738:S4_19_48_45.mzXML:scan:5232:FSALEVDETYVPK/2	ARP-Plasma:ARP-OxHSA
mzspec:PXD023738:S4_19_48_40.mzXML:scan:5346:FSALEVDETYVPK/2	ARP-Plasma:ARP-OxHSA
mzspec:PXD023738:S4_19_48_44.mzXML:scan:5217:FSALEVDETYVPK/2	ARP-Plasma:ARP-OxHSA
mzspec:PXD023738:S4_19_48_41.mzXML:scan:5272:FSALEVDETYVPK/2	ARP-Plasma:ARP-OxHSA
mzspec:PXD023738:S4_19_48_42.mzXML:scan:5253:FSALEVDETYVPK/2	ARP-Plasma:ARP-OxHSA
mzspec:PXD023738:S4_19_48_46.mzXML:scan:4533:FSALEVDETYVPK/2	ARP-Plasma:ARP-OxHSA
mzspec:PXD023738:S4_19_48_48.mzXML:scan:4542:FSALEVDETYVPK/2	ARP-Plasma:ARP-OxHSA
mzspec:PXD023738:S4_19_48_47.mzXML:scan:4500:FSALEVDETYVPK/2	ARP-Plasma:ARP-OxHSA
mzspec:PXD023738:S4_19_48_43.mzXML:scan:5440:HPDYSVVLLLR/2	ARP-Plasma:ARP-OxHSA
mzspec:PXD023738:S4_19_48_43.mzXML:scan:5422:HPDYSVVLLLR/2	ARP-Plasma:ARP-OxHSA
mzspec:PXD023738:S4_19_48_45.mzXML:scan:5478:HPDYSVVLLLR/2	ARP-Plasma:ARP-OxHSA
mzspec:PXD023738:S4_19_48_40.mzXML:scan:5604:HPDYSVVLLLR/2	ARP-Plasma:ARP-OxHSA
mzspec:PXD023738:S4_19_48_43.mzXML:scan:5458:HPDYSVVLLLR/2	ARP-Plasma:ARP-OxHSA
mzspec:PXD023738:S4_19_48_46.mzXML:scan:4783:HPDYSVVLLLR/2	ARP-Plasma:ARP-OxHSA
mzspec:PXD023738:S4_19_48_41.mzXML:scan:5524:HPDYSVVLLLR/2	ARP-Plasma:ARP-OxHSA
mzspec:PXD023738:S4_19_48_42.mzXML:scan:5511:HPDYSVVLLLR/2	ARP-Plasma:ARP-OxHSA
mzspec:PXD023738:S4_19_48_44.mzXML:scan:5469:HPDYSVVLLLR/2	ARP-Plasma:ARP-OxHSA
mzspec:PXD023738:S4_19_48_46.mzXML:scan:4801:HPDYSVVLLLR/2	ARP-Plasma:ARP-OxHSA
mzspec:PXD023738:S4_19_48_47.mzXML:scan:4737:HPDYSVVLLLR/2	ARP-Plasma:ARP-OxHSA
mzspec:PXD023738:S4_19_48_48.mzXML:scan:4802:HPDYSVVLLLR/2	ARP-Plasma:ARP-OxHSA
mzspec:PXD023738:S4_19_48_49.mzXML:scan:4843:HPDYSVVLLLR/2	ARP-Plasma:ARP-OxHSA
mzspec:PXD023738:S4_19_48_46.mzXML:scan:4753:HPDYSVVLLLR/2	ARP-Plasma:ARP-OxHSA
mzspec:PXD023738:S4_19_48_48.mzXML:scan:4748:HPDYSVVLLLR/2	ARP-Plasma:ARP-OxHSA
mzspec:PXD023738:S4_19_48_48.mzXML:scan:4784:HPDYSVVLLLR/2	ARP-Plasma:ARP-OxHSA
mzspec:PXD023738:S4_19_48_46.mzXML:scan:4771:HPDYSVVLLLR/2	ARP-Plasma:ARP-OxHSA
mzspec:PXD023738:S4_19_48_48.mzXML:scan:4923:HPDYSVVLLLR/2	ARP-Plasma:ARP-OxHSA
mzspec:PXD023738:S4_19_48_50.mzXML:scan:4925:HPDYSVVLLLR/2	ARP-Plasma:ARP-OxHSA
mzspec:PXD023738:S4_19_48_49.mzXML:scan:4951:HPDYSVVLLLR/2	ARP-Plasma:ARP-OxHSA
mzspec:PXD023738:S4_19_48_43.mzXML:scan:6838:HPDYSVVLLLR/2	ARP-Plasma:ARP-OxHSA
mzspec:PXD023738:S4_19_48_40.mzXML:scan:5660:HPDYSVVLLLR/2	ARP-Plasma:ARP-OxHSA
mzspec:PXD023738:S4_19_48_48.mzXML:scan:5087:HPDYSVVLLLR/2	ARP-Plasma:ARP-OxHSA
mzspec:PXD023738:S4_19_48_44.mzXML:scan:6710:HPDYSVVLLLR/2	ARP-Plasma:ARP-OxHSA
mzspec:PXD023738:S4_19_48_46.mzXML:scan:4755:HPDYSVVLLLR/3	ARP-Plasma:ARP-OxHSA
mzspec:PXD023738:S4_19_48_49.mzXML:scan:4919:HPDYSVVLLLR/3	ARP-Plasma:ARP-OxHSA
mzspec:PXD023738:S4_19_48_43.mzXML:scan:5449:HPDYSVVLLLR/3	ARP-Plasma:ARP-OxHSA
mzspec:PXD023738:S4_19_48_46.mzXML:scan:4772:HPDYSVVLLLR/3	ARP-Plasma:ARP-OxHSA
mzspec:PXD023738:S4_19_48_48.mzXML:scan:8260:HPDYSVVLLLR/2	ARP-Plasma:ARP-OxHSA
mzspec:PXD023738:S4_19_48_42.mzXML:scan:5517:HPDYSVVLLLR/3	ARP-Plasma:ARP-OxHSA
mzspec:PXD023738:S4_19_48_47.mzXML:scan:4725:HPDYSVVLLLR/3	ARP-Plasma:ARP-OxHSA
mzspec:PXD023738:S4_19_48_49.mzXML:scan:6263:HPDYSVVLLLR/2	ARP-Plasma:ARP-OxHSA
mzspec:PXD023738:S4_19_48_49.mzXML:scan:4862:HPDYSVVLLLR/3	ARP-Plasma:ARP-OxHSA
mzspec:PXD023738:S4_19_48_49.mzXML:scan:7665:HPDYSVVLLLR/2	ARP-Plasma:ARP-OxHSA
mzspec:PXD023738:S4_19_48_49.mzXML:scan:4844:HPDYSVVLLLR/3	ARP-Plasma:ARP-OxHSA
mzspec:PXD023738:S4_19_48_50.mzXML:scan:4919:HPDYSVVLLLR/3	ARP-Plasma:ARP-OxHSA
mzspec:PXD023738:S4_19_48_44.mzXML:scan:5483:HPDYSVVLLLR/3	ARP-Plasma:ARP-OxHSA
mzspec:PXD023738:S4_19_48_45.mzXML:scan:7074:HPDYSVVLLLR/2	ARP-Plasma:ARP-OxHSA
mzspec:PXD023738:S4_19_48_47.mzXML:scan:5045:HPDYSVVLLLR/2	ARP-Plasma:ARP-OxHSA
mzspec:PXD023738:S4_19_48_44.mzXML:scan:5735:HPDYSVVLLLR/2	ARP-Plasma:ARP-OxHSA
mzspec:PXD023738:S4_19_48_40.mzXML:scan:5618:HPDYSVVLLLR/3	ARP-Plasma:ARP-OxHSA
mzspec:PXD023738:S4_19_48_48.mzXML:scan:6121:HPDYSVVLLLR/2	ARP-Plasma:ARP-OxHSA
mzspec:PXD023738:S4_19_48_46.mzXML:scan:4789:HPDYSVVLLLR/3	ARP-Plasma:ARP-OxHSA
mzspec:PXD023738:S4_19_48_49.mzXML:scan:4791:HPDYSVVLLLR/2	ARP-Plasma:ARP-OxHSA
mzspec:PXD023738:S4_19_48_44.mzXML:scan:7012:HPDYSVVLLLR/2	ARP-Plasma:ARP-OxHSA
mzspec:PXD023738:S4_19_48_45.mzXML:scan:5773:HPDYSVVLLLR/2	ARP-Plasma:ARP-OxHSA
mzspec:PXD023738:S4_19_48_47.mzXML:scan:4762:HPDYSVVLLLR/3	ARP-Plasma:ARP-OxHSA
mzspec:PXD023738:S4_19_48_48.mzXML:scan:4785:HPDYSVVLLLR/3	ARP-Plasma:ARP-OxHSA
mzspec:PXD023738:S4_19_48_48.mzXML:scan:4749:HPDYSVVLLLR/3	ARP-Plasma:ARP-OxHSA
mzspec:PXD023738:S4_19_48_47.mzXML:scan:5064:HPDYSVVLLLR/2	ARP-Plasma:ARP-OxHSA
mzspec:PXD023738:S4_19_48_43.mzXML:scan:7038:HPDYSVVLLLR/2	ARP-Plasma:ARP-OxHSA
mzspec:PXD023738:S4_19_48_43.mzXML:scan:5561:HPDYSVVLLLR/2	ARP-Plasma:ARP-OxHSA
mzspec:PXD023738:S4_19_48_49.mzXML:scan:4898:HPDYSVVLLLR/3	ARP-Plasma:ARP-OxHSA
mzspec:PXD023738:S4_19_48_49.mzXML:scan:4880:HPDYSVVLLLR/3	ARP-Plasma:ARP-OxHSA
mzspec:PXD023738:S4_19_48_49.mzXML:scan:6182:HPDYSVVLLLR/2	ARP-Plasma:ARP-OxHSA
mzspec:PXD023738:S4_19_48_48.mzXML:scan:4809:HPDYSVVLLLR/3	ARP-Plasma:ARP-OxHSA
mzspec:PXD023738:S4_19_48_41.mzXML:scan:5544:HPDYSVVLLLR/3	ARP-Plasma:ARP-OxHSA
mzspec:PXD023738:S4_19_48_48.mzXML:scan:5217:HPDYSVVLLLR/2	ARP-Plasma:ARP-OxHSA
mzspec:PXD023738:S4_19_48_50.mzXML:scan:4868:HPDYSVVLLLR/2	ARP-Plasma:ARP-OxHSA
mzspec:PXD023738:S4_19_48_46.mzXML:scan:5272:HPDYSVVLLLR/2	ARP-Plasma:ARP-OxHSA
mzspec:PXD023738:S4_19_48_48.mzXML:scan:4828:HPDYSVVLLLR/3	ARP-Plasma:ARP-OxHSA
mzspec:PXD023738:S4_19_48_49.mzXML:scan:6479:HPDYSVVLLLR/2	ARP-Plasma:ARP-OxHSA
mzspec:PXD023738:S4_19_48_46.mzXML:scan:5218:HPDYSVVLLLR/2	ARP-Plasma:ARP-OxHSA
mzspec:PXD023738:S4_19_48_48.mzXML:scan:5848:HPDYSVVLLLR/2	ARP-Plasma:ARP-OxHSA
mzspec:PXD023738:S4_19_48_48.mzXML:scan:4858:HPDYSVVLLLR/3	ARP-Plasma:ARP-OxHSA
mzspec:PXD023738:S4_19_48_48.mzXML:scan:6287:HPDYSVVLLLR/2	ARP-Plasma:ARP-OxHSA
mzspec:PXD023738:S4_19_48_49.mzXML:scan:6174:HPDYSVVLLLR/2	ARP-Plasma:ARP-OxHSA
mzspec:PXD023738:S4_19_48_48.mzXML:scan:5681:HPDYSVVLLLR/2	ARP-Plasma:ARP-OxHSA
mzspec:PXD023738:S4_19_48_50.mzXML:scan:5073:HPDYSVVLLLR/3	ARP-Plasma:ARP-OxHSA
mzspec:PXD023738:S4_19_48_48.mzXML:scan:6295:HPDYSVVLLLR/2	ARP-Plasma:ARP-OxHSA
mzspec:PXD023738:S4_19_48_46.mzXML:scan:5479:HPDYSVVLLLR/2	ARP-Plasma:ARP-OxHSA
mzspec:PXD023738:S4_19_48_46.mzXML:scan:5321:HPDYSVVLLLR/2	ARP-Plasma:ARP-OxHSA
mzspec:PXD023738:S4_19_48_48.mzXML:scan:6388:HPDYSVVLLLR/2	ARP-Plasma:ARP-OxHSA
mzspec:PXD023738:S4_19_48_50.mzXML:scan:6005:HPDYSVVLLLR/2	ARP-Plasma:ARP-OxHSA
mzspec:PXD023738:S4_19_48_48.mzXML:scan:5776:HPDYSVVLLLR/2	ARP-Plasma:ARP-OxHSA
mzspec:PXD023738:S4_19_48_47.mzXML:scan:5189:HPDYSVVLLLR/2	ARP-Plasma:ARP-OxHSA
mzspec:PXD023738:S4_19_48_49.mzXML:scan:6033:HPDYSVVLLLR/2	ARP-Plasma:ARP-OxHSA
mzspec:PXD023738:S4_19_48_48.mzXML:scan:5999:HPDYSVVLLLR/2	ARP-Plasma:ARP-OxHSA
mzspec:PXD023738:S4_19_48_45.mzXML:scan:6284:HPDYSVVLLLR/2	ARP-Plasma:ARP-OxHSA
mzspec:PXD023738:S4_19_48_48.mzXML:scan:6270:HPDYSVVLLLR/2	ARP-Plasma:ARP-OxHSA
mzspec:PXD023738:S4_19_48_46.mzXML:scan:5421:HPDYSVVLLLR/2	ARP-Plasma:ARP-OxHSA
mzspec:PXD023738:S4_19_48_40.mzXML:scan:5720:HPDYSVVLLLR/2	ARP-Plasma:ARP-OxHSA
mzspec:PXD023738:S4_19_48_49.mzXML:scan:6395:HPDYSVVLLLR/2	ARP-Plasma:ARP-OxHSA
mzspec:PXD023738:S4_19_48_46.mzXML:scan:5336:HPDYSVVLLLR/2	ARP-Plasma:ARP-OxHSA
mzspec:PXD023738:S4_19_48_50.mzXML:scan:5623:HPDYSVVLLLR/2	ARP-Plasma:ARP-OxHSA
mzspec:PXD023738:S4_19_48_47.mzXML:scan:5025:HPDYSVVLLLR/2	ARP-Plasma:ARP-OxHSA
mzspec:PXD023738:S4_19_48_46.mzXML:scan:5605:HPDYSVVLLLR/2	ARP-Plasma:ARP-OxHSA
mzspec:PXD023738:S4_19_48_47.mzXML:scan:8113:HPDYSVVLLLR/2	ARP-Plasma:ARP-OxHSA
mzspec:PXD023738:S4_19_48_43.mzXML:scan:6213:HPDYSVVLLLR/2	ARP-Plasma:ARP-OxHSA
mzspec:PXD023738:S4_19_48_46.mzXML:scan:5645:HPDYSVVLLLR/2	ARP-Plasma:ARP-OxHSA
mzspec:PXD023738:S4_19_48_50.mzXML:scan:6565:HPDYSVVLLLR/2	ARP-Plasma:ARP-OxHSA
mzspec:PXD023738:S4_19_48_46.mzXML:scan:5353:HPDYSVVLLLR/2	ARP-Plasma:ARP-OxHSA
mzspec:PXD023738:S4_19_48_46.mzXML:scan:5564:HPDYSVVLLLR/2	ARP-Plasma:ARP-OxHSA
mzspec:PXD023738:S4_19_48_48.mzXML:scan:7480:HPDYSVVLLLR/2	ARP-Plasma:ARP-OxHSA
mzspec:PXD023738:S4_19_48_48.mzXML:scan:6192:HPDYSVVLLLR/2	ARP-Plasma:ARP-OxHSA
mzspec:PXD023738:S4_19_48_49.mzXML:scan:6959:HPDYSVVLLLR/2	ARP-Plasma:ARP-OxHSA
mzspec:PXD023738:S4_19_48_47.mzXML:scan:8326:HPDYSVVLLLR/2	ARP-Plasma:ARP-OxHSA
mzspec:PXD023738:S4_19_48_50.mzXML:scan:8059:HPDYSVVLLLR/2	ARP-Plasma:ARP-OxHSA
mzspec:PXD023738:S4_19_48_50.mzXML:scan:8478:HPDYSVVLLLR/2	ARP-Plasma:ARP-OxHSA
mzspec:PXD023738:S4_19_48_46.mzXML:scan:5661:HPDYSVVLLLR/2	ARP-Plasma:ARP-OxHSA
mzspec:PXD023738:S4_19_48_48.mzXML:scan:5531:HPDYSVVLLLR/2	ARP-Plasma:ARP-OxHSA
mzspec:PXD023738:S4_19_48_42.mzXML:scan:6306:HPDYSVVLLLR/2	ARP-Plasma:ARP-OxHSA
mzspec:PXD023738:S4_19_48_46.mzXML:scan:5523:HPDYSVVLLLR/2	ARP-Plasma:ARP-OxHSA
mzspec:PXD023738:S4_19_48_46.mzXML:scan:5875:HPDYSVVLLLR/2	ARP-Plasma:ARP-OxHSA
mzspec:PXD023738:S4_19_48_50.mzXML:scan:5606:HPDYSVVLLLR/2	ARP-Plasma:ARP-OxHSA
mzspec:PXD023738:S4_19_48_47.mzXML:scan:5040:HPDYSVVLLLR/2	ARP-Plasma:ARP-OxHSA
mzspec:PXD023738:S4_19_48_44.mzXML:scan:6199:HPDYSVVLLLR/2	ARP-Plasma:ARP-OxHSA
mzspec:PXD023738:S4_19_48_46.mzXML:scan:5398:HPDYSVVLLLR/2	ARP-Plasma:ARP-OxHSA
mzspec:PXD023738:S4_19_48_47.mzXML:scan:6360:HPDYSVVLLLR/2	ARP-Plasma:ARP-OxHSA
mzspec:PXD023738:S4_19_48_46.mzXML:scan:5530:HPDYSVVLLLR/2	ARP-Plasma:ARP-OxHSA
mzspec:PXD023738:S4_19_48_49.mzXML:scan:5925:HPDYSVVLLLR/2	ARP-Plasma:ARP-OxHSA
mzspec:PXD023738:S4_19_48_44.mzXML:scan:6219:HPDYSVVLLLR/2	ARP-Plasma:ARP-OxHSA
mzspec:PXD023738:S4_19_48_49.mzXML:scan:7271:HPDYSVVLLLR/2	ARP-Plasma:ARP-OxHSA
mzspec:PXD023738:S4_19_48_49.mzXML:scan:6517:HPDYSVVLLLR/2	ARP-Plasma:ARP-OxHSA
mzspec:PXD023738:S4_19_48_48.mzXML:scan:6441:HPDYSVVLLLR/2	ARP-Plasma:ARP-OxHSA
mzspec:PXD023738:S4_19_48_49.mzXML:scan:5752:HPDYSVVLLLR/2	ARP-Plasma:ARP-OxHSA
mzspec:PXD023738:S4_19_48_49.mzXML:scan:6012:HPDYSVVLLLR/2	ARP-Plasma:ARP-OxHSA
mzspec:PXD023738:S4_19_48_46.mzXML:scan:5545:HPDYSVVLLLR/2	ARP-Plasma:ARP-OxHSA
mzspec:PXD023738:S4_19_48_42.mzXML:scan:7072:HPDYSVVLLLR/2	ARP-Plasma:ARP-OxHSA
mzspec:PXD023738:S4_19_48_50.mzXML:scan:5641:HPDYSVVLLLR/2	ARP-Plasma:ARP-OxHSA
mzspec:PXD023738:S4_19_48_50.mzXML:scan:6395:HPDYSVVLLLR/2	ARP-Plasma:ARP-OxHSA
mzspec:PXD023738:S4_19_48_49.mzXML:scan:6163:HPDYSVVLLLR/2	ARP-Plasma:ARP-OxHSA
mzspec:PXD023738:S4_19_48_45.mzXML:scan:7187:HPDYSVVLLLR/2	ARP-Plasma:ARP-OxHSA
mzspec:PXD023738:S4_19_48_48.mzXML:scan:6166:HPDYSVVLLLR/2	ARP-Plasma:ARP-OxHSA
mzspec:PXD023738:S4_19_48_48.mzXML:scan:6311:HPDYSVVLLLR/2	ARP-Plasma:ARP-OxHSA
mzspec:PXD023738:S4_19_48_48.mzXML:scan:5700:HPDYSVVLLLR/2	ARP-Plasma:ARP-OxHSA
mzspec:PXD023738:S4_19_48_48.mzXML:scan:5782:HPDYSVVLLLR/2	ARP-Plasma:ARP-OxHSA
mzspec:PXD023738:S4_19_48_49.mzXML:scan:5860:HPDYSVVLLLR/2	ARP-Plasma:ARP-OxHSA
mzspec:PXD023738:S4_19_48_49.mzXML:scan:5920:HPDYSVVLLLR/2	ARP-Plasma:ARP-OxHSA
mzspec:PXD023738:S4_19_48_48.mzXML:scan:6353:HPDYSVVLLLR/2	ARP-Plasma:ARP-OxHSA
mzspec:PXD023738:S4_19_48_49.mzXML:scan:6471:HPDYSVVLLLR/2	ARP-Plasma:ARP-OxHSA
mzspec:PXD023738:S4_19_48_49.mzXML:scan:5822:HPDYSVVLLLR/2	ARP-Plasma:ARP-OxHSA
mzspec:PXD023738:S4_19_48_46.mzXML:scan:5510:HPDYSVVLLLR/2	ARP-Plasma:ARP-OxHSA
mzspec:PXD023738:S4_19_48_46.mzXML:scan:5788:HPDYSVVLLLR/2	ARP-Plasma:ARP-OxHSA
mzspec:PXD023738:S4_19_48_50.mzXML:scan:6354:HPDYSVVLLLR/2	ARP-Plasma:ARP-OxHSA
mzspec:PXD023738:S4_19_48_49.mzXML:scan:5943:HPDYSVVLLLR/2	ARP-Plasma:ARP-OxHSA
mzspec:PXD023738:S4_19_48_49.mzXML:scan:5877:HPDYSVVLLLR/2	ARP-Plasma:ARP-OxHSA
mzspec:PXD023738:S4_19_48_48.mzXML:scan:6148:HPDYSVVLLLR/2	ARP-Plasma:ARP-OxHSA
mzspec:PXD023738:S4_19_48_48.mzXML:scan:6494:HPDYSVVLLLR/2	ARP-Plasma:ARP-OxHSA
mzspec:PXD023738:S4_19_48_48.mzXML:scan:5796:HPDYSVVLLLR/2	ARP-Plasma:ARP-OxHSA
mzspec:PXD023738:S4_19_48_46.mzXML:scan:5577:HPDYSVVLLLR/2	ARP-Plasma:ARP-OxHSA
mzspec:PXD023738:S4_19_48_48.mzXML:scan:6243:HPDYSVVLLLR/2	ARP-Plasma:ARP-OxHSA
mzspec:PXD023738:S4_19_48_49.mzXML:scan:5995:HPDYSVVLLLR/2	ARP-Plasma:ARP-OxHSA
mzspec:PXD023738:S4_19_48_46.mzXML:scan:5753:HPDYSVVLLLR/2	ARP-Plasma:ARP-OxHSA
mzspec:PXD023738:S4_19_48_49.mzXML:scan:8402:HPDYSVVLLLR/2	ARP-Plasma:ARP-OxHSA
mzspec:PXD023738:S4_19_48_44.mzXML:scan:6317:HPDYSVVLLLR/2	ARP-Plasma:ARP-OxHSA
mzspec:PXD023738:S4_19_48_50.mzXML:scan:6375:HPDYSVVLLLR/2	ARP-Plasma:ARP-OxHSA
mzspec:PXD023738:S4_19_48_44.mzXML:scan:6930:HPDYSVVLLLR/2	ARP-Plasma:ARP-OxHSA
mzspec:PXD023738:S4_19_48_46.mzXML:scan:8077:HPDYSVVLLLR/2	ARP-Plasma:ARP-OxHSA
mzspec:PXD023738:S4_19_48_50.mzXML:scan:6632:HPDYSVVLLLR/2	ARP-Plasma:ARP-OxHSA
mzspec:PXD023738:S4_19_48_42.mzXML:scan:6555:HPDYSVVLLLR/2	ARP-Plasma:ARP-OxHSA
mzspec:PXD023738:S4_19_48_49.mzXML:scan:5789:HPDYSVVLLLR/2	ARP-Plasma:ARP-OxHSA
mzspec:PXD023738:S4_19_48_48.mzXML:scan:6053:HPDYSVVLLLR/2	ARP-Plasma:ARP-OxHSA
mzspec:PXD023738:S4_19_48_48.mzXML:scan:7194:HPDYSVVLLLR/2	ARP-Plasma:ARP-OxHSA
mzspec:PXD023738:S4_19_48_46.mzXML:scan:5584:HPDYSVVLLLR/2	ARP-Plasma:ARP-OxHSA
mzspec:PXD023738:S4_19_48_48.mzXML:scan:6508:HPDYSVVLLLR/2	ARP-Plasma:ARP-OxHSA
mzspec:PXD023738:S4_19_48_48.mzXML:scan:5760:HPDYSVVLLLR/2	ARP-Plasma:ARP-OxHSA
mzspec:PXD023738:S4_19_48_48.mzXML:scan:5802:HPDYSVVLLLR/2	ARP-Plasma:ARP-OxHSA
mzspec:PXD023738:S4_19_48_48.mzXML:scan:5573:HPDYSVVLLLR/2	ARP-Plasma:ARP-OxHSA
mzspec:PXD023738:S4_19_48_49.mzXML:scan:5866:HPDYSVVLLLR/2	ARP-Plasma:ARP-OxHSA
mzspec:PXD023738:S4_19_48_48.mzXML:scan:5502:HPDYSVVLLLR/2	ARP-Plasma:ARP-OxHSA
mzspec:PXD023738:S4_19_48_48.mzXML:scan:7368:HPDYSVVLLLR/2	ARP-Plasma:ARP-OxHSA
mzspec:PXD023738:S4_19_48_46.mzXML:scan:5852:HPDYSVVLLLR/2	ARP-Plasma:ARP-OxHSA
mzspec:PXD023738:S4_19_48_49.mzXML:scan:6052:HPDYSVVLLLR/2	ARP-Plasma:ARP-OxHSA
mzspec:PXD023738:S4_19_48_48.mzXML:scan:6072:HPDYSVVLLLR/2	ARP-Plasma:ARP-OxHSA
mzspec:PXD023738:S4_19_48_48.mzXML:scan:6226:HPDYSVVLLLR/2	ARP-Plasma:ARP-OxHSA
mzspec:PXD023738:S4_19_48_49.mzXML:scan:5903:HPDYSVVLLLR/2	ARP-Plasma:ARP-OxHSA
mzspec:PXD023738:S4_19_48_46.mzXML:scan:5462:HPDYSVVLLLR/2	ARP-Plasma:ARP-OxHSA
mzspec:PXD023738:S4_19_48_48.mzXML:scan:5736:HPDYSVVLLLR/2	ARP-Plasma:ARP-OxHSA
mzspec:PXD023738:S4_19_48_49.mzXML:scan:5885:HPDYSVVLLLR/2	ARP-Plasma:ARP-OxHSA
mzspec:PXD023738:S4_19_48_48.mzXML:scan:6378:HPDYSVVLLLR/2	ARP-Plasma:ARP-OxHSA
mzspec:PXD023738:S4_19_48_45.mzXML:scan:7360:HPDYSVVLLLR/2	ARP-Plasma:ARP-OxHSA
mzspec:PXD023738:S4_19_48_46.mzXML:scan:5242:HPDYSVVLLLR/2	ARP-Plasma:ARP-OxHSA
mzspec:PXD023738:S4_19_48_46.mzXML:scan:5505:HPDYSVVLLLR/2	ARP-Plasma:ARP-OxHSA
mzspec:PXD023738:S4_19_48_48.mzXML:scan:5506:HPDYSVVLLLR/2	ARP-Plasma:ARP-OxHSA
mzspec:PXD023738:S4_19_48_47.mzXML:scan:6009:HPDYSVVLLLR/2	ARP-Plasma:ARP-OxHSA
mzspec:PXD023738:S4_19_48_42.mzXML:scan:6156:HPDYSVVLLLR/2	ARP-Plasma:ARP-OxHSA
mzspec:PXD023738:S4_19_48_45.mzXML:scan:6536:HPDYSVVLLLR/2	ARP-Plasma:ARP-OxHSA
mzspec:PXD023738:S4_19_48_46.mzXML:scan:5291:HPDYSVVLLLR/2	ARP-Plasma:ARP-OxHSA
mzspec:PXD023738:S4_19_48_42.mzXML:scan:5995:HPDYSVVLLLR/2	ARP-Plasma:ARP-OxHSA
mzspec:PXD023738:S4_19_48_48.mzXML:scan:5525:HPDYSVVLLLR/2	ARP-Plasma:ARP-OxHSA
mzspec:PXD023738:S4_19_48_48.mzXML:scan:5717:HPDYSVVLLLR/2	ARP-Plasma:ARP-OxHSA
mzspec:PXD023738:S4_19_48_46.mzXML:scan:5679:HPDYSVVLLLR/2	ARP-Plasma:ARP-OxHSA
mzspec:PXD023738:S4_19_48_47.mzXML:scan:6778:HPDYSVVLLLR/2	ARP-Plasma:ARP-OxHSA
mzspec:PXD023738:S4_19_48_46.mzXML:scan:5415:HPDYSVVLLLR/2	ARP-Plasma:ARP-OxHSA
mzspec:PXD023738:S4_19_48_46.mzXML:scan:5628:HPDYSVVLLLR/2	ARP-Plasma:ARP-OxHSA
mzspec:PXD023738:S4_19_48_48.mzXML:scan:5650:HPDYSVVLLLR/2	ARP-Plasma:ARP-OxHSA
mzspec:PXD023738:S4_19_48_48.mzXML:scan:5482:HPDYSVVLLLR/2	ARP-Plasma:ARP-OxHSA
mzspec:PXD023738:S4_19_48_46.mzXML:scan:5985:HPDYSVVLLLR/2	ARP-Plasma:ARP-OxHSA
mzspec:PXD023738:S4_19_48_47.mzXML:scan:7974:HPDYSVVLLLR/2	ARP-Plasma:ARP-OxHSA
mzspec:PXD023738:S4_19_48_49.mzXML:scan:5966:HPDYSVVLLLR/2	ARP-Plasma:ARP-OxHSA
mzspec:PXD023738:S4_19_48_46.mzXML:scan:5801:HPDYSVVLLLR/2	ARP-Plasma:ARP-OxHSA
mzspec:PXD023738:S4_19_48_48.mzXML:scan:5549:HPDYSVVLLLR/2	ARP-Plasma:ARP-OxHSA
mzspec:PXD023738:S4_19_48_48.mzXML:scan:5669:HPDYSVVLLLR/2	ARP-Plasma:ARP-OxHSA
mzspec:PXD023738:S4_19_48_47.mzXML:scan:6445:HPDYSVVLLLR/2	ARP-Plasma:ARP-OxHSA
mzspec:PXD023738:S4_19_48_49.mzXML:scan:5842:HPDYSVVLLLR/2	ARP-Plasma:ARP-OxHSA
mzspec:PXD023738:S4_19_48_49.mzXML:scan:5114:RHPYFYAPELLFFAKR/4	ARP-Plasma:ARP-OxHSA
mzspec:PXD023738:S4_19_48_47.mzXML:scan:5004:RHPYFYAPELLFFAKR/4	ARP-Plasma:ARP-OxHSA
mzspec:PXD023738:S4_19_48_48.mzXML:scan:5042:RHPYFYAPELLFFAKR/4	ARP-Plasma:ARP-OxHSA
mzspec:PXD023738:S4_19_48_48.mzXML:scan:5025:RHPYFYAPELLFFAKR/4	ARP-Plasma:ARP-OxHSA
mzspec:PXD023738:S4_19_48_46.mzXML:scan:5053:RHPYFYAPELLFFAKR/4	ARP-Plasma:ARP-OxHSA
mzspec:PXD023738:S4_19_48_50.mzXML:scan:5201:RHPYFYAPELLFFAKR/4	ARP-Plasma:ARP-OxHSA
mzspec:PXD023738:S4_19_48_50.mzXML:scan:5195:RHPYFYAPELLFFAKR/3	ARP-Plasma:ARP-OxHSA
mzspec:PXD023738:S4_19_48_48.mzXML:scan:5034:RHPYFYAPELLFFAKR/3	ARP-Plasma:ARP-OxHSA
mzspec:PXD023738:S4_19_48_49.mzXML:scan:5103:RHPYFYAPELLFFAKR/3	ARP-Plasma:ARP-OxHSA
mzspec:PXD023738:S4_19_48_46.mzXML:scan:5043:RHPYFYAPELLFFAKR/3	ARP-Plasma:ARP-OxHSA
mzspec:PXD023738:S4_19_48_43.mzXML:scan:1627:ADDKETC[+57.0215]FAEEGKK/3	ARP-Plasma:ARP-OxHSA
mzspec:PXD023738:S4_19_48_45.mzXML:scan:1644:ADDKETC[+57.0215]FAEEGKK/3	ARP-Plasma:ARP-OxHSA
mzspec:PXD023738:S4_19_48_44.mzXML:scan:1626:ADDKETC[+57.0215]FAEEGKK/3	ARP-Plasma:ARP-OxHSA
mzspec:PXD023738:S4_19_48_41.mzXML:scan:1639:ADDKETC[+57.0215]FAEEGKK/3	ARP-Plasma:ARP-OxHSA
mzspec:PXD023738:S4_19_48_45.mzXML:scan:1647:ADDKETC[+57.0215]FAEEGKK/4	ARP-Plasma:ARP-OxHSA
mzspec:PXD023738:S4_19_48_42.mzXML:scan:1638:ADDKETC[+57.0215]FAEEGKK/3	ARP-Plasma:ARP-OxHSA
mzspec:PXD023738:S4_19_48_40.mzXML:scan:1655:ADDKETC[+57.0215]FAEEGKK/3	ARP-Plasma:ARP-OxHSA
mzspec:PXD023738:S4_19_48_40.mzXML:scan:1652:ADDKETC[+57.0215]FAEEGKK/4	ARP-Plasma:ARP-OxHSA
mzspec:PXD023738:S4_19_48_42.mzXML:scan:1639:ADDKETC[+57.0215]FAEEGKK/4	ARP-Plasma:ARP-OxHSA
mzspec:PXD023738:S4_19_48_41.mzXML:scan:1643:ADDKETC[+57.0215]FAEEGKK/4	ARP-Plasma:ARP-OxHSA
mzspec:PXD023738:S4_19_48_43.mzXML:scan:1624:ADDKETC[+57.0215]FAEEGKK/4	ARP-Plasma:ARP-OxHSA
mzspec:PXD023738:S4_19_48_44.mzXML:scan:1628:ADDKETC[+57.0215]FAEEGKK/4	ARP-Plasma:ARP-OxHSA
mzspec:PXD023738:S4_19_48_43.mzXML:scan:3381:ADDKETC[+57.0215]FAEEGKK/3	ARP-Plasma:ARP-OxHSA
mzspec:PXD023738:S4_19_48_40.mzXML:scan:3576:ADDKETC[+57.0215]FAEEGKK/3	ARP-Plasma:ARP-OxHSA
mzspec:PXD023738:S4_19_48_44.mzXML:scan:3427:ADDKETC[+57.0215]FAEEGKK/3	ARP-Plasma:ARP-OxHSA
mzspec:PXD023738:S4_19_48_42.mzXML:scan:3458:ADDKETC[+57.0215]FAEEGKK/3	ARP-Plasma:ARP-OxHSA
mzspec:PXD023738:S4_19_48_44.mzXML:scan:3404:ADDKETC[+57.0215]FAEEGKK/3	ARP-Plasma:ARP-OxHSA
mzspec:PXD023738:S4_19_48_44.mzXML:scan:1631:ADDKETC[+57.0215]FAEEGKK/2	ARP-Plasma:ARP-OxHSA
mzspec:PXD023738:S4_19_48_44.mzXML:scan:324:ADDKETC[+57.0215]FAEEGKK/3	ARP-Plasma:ARP-OxHSA
mzspec:PXD023738:S4_19_48_45.mzXML:scan:330:ADDKETC[+57.0215]FAEEGKK/3	ARP-Plasma:ARP-OxHSA
mzspec:PXD023738:S4_19_48_41.mzXML:scan:3471:ADDKETC[+57.0215]FAEEGKK/3	ARP-Plasma:ARP-OxHSA
mzspec:PXD023738:S4_19_48_50.mzXML:scan:310:ADDKETC[+57.0215]FAEEGKK/3	ARP-Plasma:ARP-OxHSA
mzspec:PXD023738:S4_19_48_40.mzXML:scan:1656:ADDKETC[+57.0215]FAEEGKK/2	ARP-Plasma:ARP-OxHSA
mzspec:PXD023738:S4_19_48_42.mzXML:scan:1640:ADDKETC[+57.0215]FAEEGKK/2	ARP-Plasma:ARP-OxHSA
mzspec:PXD023738:S4_19_48_45.mzXML:scan:3438:ADDKETC[+57.0215]FAEEGKK/3	ARP-Plasma:ARP-OxHSA
mzspec:PXD023738:S4_19_48_41.mzXML:scan:1646:ADDKETC[+57.0215]FAEEGKK/2	ARP-Plasma:ARP-OxHSA
mzspec:PXD023738:S4_19_48_43.mzXML:scan:4660:LVNEVTEFAK/2	ARP-Plasma:ARP-OxHSA
mzspec:PXD023738:S4_19_48_45.mzXML:scan:4820:LVNEVTEFAK/2	ARP-Plasma:ARP-OxHSA
mzspec:PXD023738:S4_19_48_44.mzXML:scan:4797:LVNEVTEFAK/2	ARP-Plasma:ARP-OxHSA
mzspec:PXD023738:S4_19_48_45.mzXML:scan:344:LVNEVTEFAK/2	ARP-Plasma:ARP-OxHSA
mzspec:PXD023738:S4_19_48_43.mzXML:scan:337:LVNEVTEFAK/2	ARP-Plasma:ARP-OxHSA
mzspec:PXD023738:S4_19_48_44.mzXML:scan:334:LVNEVTEFAK/2	ARP-Plasma:ARP-OxHSA
mzspec:PXD023738:S4_19_48_42.mzXML:scan:332:LVNEVTEFAK/2	ARP-Plasma:ARP-OxHSA
mzspec:PXD023738:S4_19_48_43.mzXML:scan:5018:LVNEVTEFAK/2	ARP-Plasma:ARP-OxHSA
mzspec:PXD023738:S4_19_48_43.mzXML:scan:4784:LVNEVTEFAK/2	ARP-Plasma:ARP-OxHSA
mzspec:PXD023738:S4_19_48_40.mzXML:scan:4854:LVNEVTEFAK/2	ARP-Plasma:ARP-OxHSA
mzspec:PXD023738:S4_19_48_45.mzXML:scan:4873:LVNEVTEFAK/2	ARP-Plasma:ARP-OxHSA
mzspec:PXD023738:S4_19_48_42.mzXML:scan:4719:LVNEVTEFAK/2	ARP-Plasma:ARP-OxHSA
mzspec:PXD023738:S4_19_48_44.mzXML:scan:5052:LVNEVTEFAK/2	ARP-Plasma:ARP-OxHSA
mzspec:PXD023738:S4_19_48_45.mzXML:scan:4704:LVNEVTEFAK/2	ARP-Plasma:ARP-OxHSA
mzspec:PXD023738:S4_19_48_43.mzXML:scan:8895:LVNEVTEFAK/2	ARP-Plasma:ARP-OxHSA
mzspec:PXD023738:S4_19_48_43.mzXML:scan:9146:LVNEVTEFAK/2	ARP-Plasma:ARP-OxHSA
mzspec:PXD023738:S4_19_48_44.mzXML:scan:4719:LVNEVTEFAK/2	ARP-Plasma:ARP-OxHSA
mzspec:PXD023738:S4_19_48_42.mzXML:scan:5059:LVNEVTEFAK/2	ARP-Plasma:ARP-OxHSA
mzspec:PXD023738:S4_19_48_44.mzXML:scan:6507:LVNEVTEFAK/2	ARP-Plasma:ARP-OxHSA
mzspec:PXD023738:S4_19_48_42.mzXML:scan:4839:LVNEVTEFAK/2	ARP-Plasma:ARP-OxHSA
mzspec:PXD023738:S4_19_48_43.mzXML:scan:5288:LVNEVTEFAK/2	ARP-Plasma:ARP-OxHSA
mzspec:PXD023738:S4_19_48_43.mzXML:scan:9179:LVNEVTEFAK/2	ARP-Plasma:ARP-OxHSA
mzspec:PXD023738:S4_19_48_43.mzXML:scan:7887:LVNEVTEFAK/2	ARP-Plasma:ARP-OxHSA
mzspec:PXD023738:S4_19_48_40.mzXML:scan:4956:LVNEVTEFAK/2	ARP-Plasma:ARP-OxHSA
mzspec:PXD023738:S4_19_48_42.mzXML:scan:4761:LVNEVTEFAK/2	ARP-Plasma:ARP-OxHSA
mzspec:PXD023738:S4_19_48_43.mzXML:scan:5202:LVNEVTEFAK/2	ARP-Plasma:ARP-OxHSA
mzspec:PXD023738:S4_19_48_43.mzXML:scan:5414:LVNEVTEFAK/2	ARP-Plasma:ARP-OxHSA
mzspec:PXD023738:S4_19_48_40.mzXML:scan:5122:LVNEVTEFAK/2	ARP-Plasma:ARP-OxHSA
mzspec:PXD023738:S4_19_48_43.mzXML:scan:8912:LVNEVTEFAK/2	ARP-Plasma:ARP-OxHSA
mzspec:PXD023738:S4_19_48_43.mzXML:scan:8837:LVNEVTEFAK/2	ARP-Plasma:ARP-OxHSA
mzspec:PXD023738:S4_19_48_44.mzXML:scan:5267:LVNEVTEFAK/2	ARP-Plasma:ARP-OxHSA
mzspec:PXD023738:S4_19_48_45.mzXML:scan:5104:LVNEVTEFAK/2	ARP-Plasma:ARP-OxHSA
mzspec:PXD023738:S4_19_48_45.mzXML:scan:9238:LVNEVTEFAK/2	ARP-Plasma:ARP-OxHSA
mzspec:PXD023738:S4_19_48_40.mzXML:scan:5158:LVNEVTEFAK/2	ARP-Plasma:ARP-OxHSA
mzspec:PXD023738:S4_19_48_40.mzXML:scan:9232:LVNEVTEFAK/2	ARP-Plasma:ARP-OxHSA
mzspec:PXD023738:S4_19_48_46.mzXML:scan:4045:LVNEVTEFAK/2	ARP-Plasma:ARP-OxHSA
mzspec:PXD023738:S4_19_48_41.mzXML:scan:4865:LVNEVTEFAK/2	ARP-Plasma:ARP-OxHSA
mzspec:PXD023738:S4_19_48_41.mzXML:scan:4768:LVNEVTEFAK/2	ARP-Plasma:ARP-OxHSA
mzspec:PXD023738:S4_19_48_43.mzXML:scan:5438:LVNEVTEFAK/2	ARP-Plasma:ARP-OxHSA
mzspec:PXD023738:S4_19_48_43.mzXML:scan:9091:LVNEVTEFAK/2	ARP-Plasma:ARP-OxHSA
mzspec:PXD023738:S4_19_48_43.mzXML:scan:9355:LVNEVTEFAK/2	ARP-Plasma:ARP-OxHSA
mzspec:PXD023738:S4_19_48_45.mzXML:scan:9178:LVNEVTEFAK/2	ARP-Plasma:ARP-OxHSA
mzspec:PXD023738:S4_19_48_44.mzXML:scan:8723:LVNEVTEFAK/2	ARP-Plasma:ARP-OxHSA
mzspec:PXD023738:S4_19_48_40.mzXML:scan:9170:LVNEVTEFAK/2	ARP-Plasma:ARP-OxHSA
mzspec:PXD023738:S4_19_48_45.mzXML:scan:9976:LVNEVTEFAK/2	ARP-Plasma:ARP-OxHSA
mzspec:PXD023738:S4_19_48_45.mzXML:scan:6649:LVNEVTEFAK/2	ARP-Plasma:ARP-OxHSA
mzspec:PXD023738:S4_19_48_47.mzXML:scan:3999:LVNEVTEFAK/2	ARP-Plasma:ARP-OxHSA
mzspec:PXD023738:S4_19_48_47.mzXML:scan:4017:LVNEVTEFAK/2	ARP-Plasma:ARP-OxHSA
mzspec:PXD023738:S4_19_48_43.mzXML:scan:7825:LVNEVTEFAK/2	ARP-Plasma:ARP-OxHSA
mzspec:PXD023738:S4_19_48_44.mzXML:scan:7169:LVNEVTEFAK/2	ARP-Plasma:ARP-OxHSA
mzspec:PXD023738:S4_19_48_49.mzXML:scan:4135:LVNEVTEFAK/2	ARP-Plasma:ARP-OxHSA
mzspec:PXD023738:S4_19_48_44.mzXML:scan:9238:LVNEVTEFAK/2	ARP-Plasma:ARP-OxHSA
mzspec:PXD023738:S4_19_48_40.mzXML:scan:5089:LVNEVTEFAK/2	ARP-Plasma:ARP-OxHSA
mzspec:PXD023738:S4_19_48_43.mzXML:scan:8415:LVNEVTEFAK/2	ARP-Plasma:ARP-OxHSA
mzspec:PXD023738:S4_19_48_43.mzXML:scan:7616:LVNEVTEFAK/2	ARP-Plasma:ARP-OxHSA
mzspec:PXD023738:S4_19_48_46.mzXML:scan:339:LVNEVTEFAK/2	ARP-Plasma:ARP-OxHSA
mzspec:PXD023738:S4_19_48_41.mzXML:scan:337:LVNEVTEFAK/2	ARP-Plasma:ARP-OxHSA
mzspec:PXD023738:S4_19_48_40.mzXML:scan:5404:LVNEVTEFAK/2	ARP-Plasma:ARP-OxHSA
mzspec:PXD023738:S4_19_48_48.mzXML:scan:4059:LVNEVTEFAK/2	ARP-Plasma:ARP-OxHSA
mzspec:PXD023738:S4_19_48_40.mzXML:scan:5230:LVNEVTEFAK/2	ARP-Plasma:ARP-OxHSA
mzspec:PXD023738:S4_19_48_45.mzXML:scan:8191:LVNEVTEFAK/2	ARP-Plasma:ARP-OxHSA
mzspec:PXD023738:S4_19_48_44.mzXML:scan:7060:LVNEVTEFAK/2	ARP-Plasma:ARP-OxHSA
mzspec:PXD023738:S4_19_48_44.mzXML:scan:9050:LVNEVTEFAK/2	ARP-Plasma:ARP-OxHSA
mzspec:PXD023738:S4_19_48_43.mzXML:scan:9322:LVNEVTEFAK/2	ARP-Plasma:ARP-OxHSA
mzspec:PXD023738:S4_19_48_41.mzXML:scan:5114:LVNEVTEFAK/2	ARP-Plasma:ARP-OxHSA
mzspec:PXD023738:S4_19_48_44.mzXML:scan:4845:LVNEVTEFAK/2	ARP-Plasma:ARP-OxHSA
mzspec:PXD023738:S4_19_48_40.mzXML:scan:9008:LVNEVTEFAK/2	ARP-Plasma:ARP-OxHSA
mzspec:PXD023738:S4_19_48_45.mzXML:scan:9019:LVNEVTEFAK/2	ARP-Plasma:ARP-OxHSA
mzspec:PXD023738:S4_19_48_43.mzXML:scan:8659:LVNEVTEFAK/2	ARP-Plasma:ARP-OxHSA
mzspec:PXD023738:S4_19_48_44.mzXML:scan:9203:LVNEVTEFAK/2	ARP-Plasma:ARP-OxHSA
mzspec:PXD023738:S4_19_48_43.mzXML:scan:9501:LVNEVTEFAK/2	ARP-Plasma:ARP-OxHSA
mzspec:PXD023738:S4_19_48_43.mzXML:scan:8985:LVNEVTEFAK/2	ARP-Plasma:ARP-OxHSA
mzspec:PXD023738:S4_19_48_41.mzXML:scan:4870:LVNEVTEFAK/2	ARP-Plasma:ARP-OxHSA
mzspec:PXD023738:S4_19_48_43.mzXML:scan:5690:LVNEVTEFAK/2	ARP-Plasma:ARP-OxHSA
mzspec:PXD023738:S4_19_48_41.mzXML:scan:5220:LVNEVTEFAK/2	ARP-Plasma:ARP-OxHSA
mzspec:PXD023738:S4_19_48_42.mzXML:scan:7104:LVNEVTEFAK/2	ARP-Plasma:ARP-OxHSA
mzspec:PXD023738:S4_19_48_43.mzXML:scan:9141:LVNEVTEFAK/2	ARP-Plasma:ARP-OxHSA
mzspec:PXD023738:S4_19_48_42.mzXML:scan:5005:LVNEVTEFAK/2	ARP-Plasma:ARP-OxHSA
mzspec:PXD023738:S4_19_48_41.mzXML:scan:5077:LVNEVTEFAK/2	ARP-Plasma:ARP-OxHSA
mzspec:PXD023738:S4_19_48_45.mzXML:scan:8172:LVNEVTEFAK/2	ARP-Plasma:ARP-OxHSA
mzspec:PXD023738:S4_19_48_45.mzXML:scan:7626:LVNEVTEFAK/2	ARP-Plasma:ARP-OxHSA
mzspec:PXD023738:S4_19_48_45.mzXML:scan:9164:LVNEVTEFAK/2	ARP-Plasma:ARP-OxHSA
mzspec:PXD023738:S4_19_48_45.mzXML:scan:5446:LVNEVTEFAK/2	ARP-Plasma:ARP-OxHSA
mzspec:PXD023738:S4_19_48_45.mzXML:scan:8538:LVNEVTEFAK/2	ARP-Plasma:ARP-OxHSA
mzspec:PXD023738:S4_19_48_44.mzXML:scan:8051:LVNEVTEFAK/2	ARP-Plasma:ARP-OxHSA
mzspec:PXD023738:S4_19_48_43.mzXML:scan:8801:LVNEVTEFAK/2	ARP-Plasma:ARP-OxHSA
mzspec:PXD023738:S4_19_48_43.mzXML:scan:5796:LVNEVTEFAK/2	ARP-Plasma:ARP-OxHSA
mzspec:PXD023738:S4_19_48_44.mzXML:scan:7160:LVNEVTEFAK/2	ARP-Plasma:ARP-OxHSA
mzspec:PXD023738:S4_19_48_42.mzXML:scan:6537:LVNEVTEFAK/2	ARP-Plasma:ARP-OxHSA
mzspec:PXD023738:S4_19_48_43.mzXML:scan:8058:LVNEVTEFAK/2	ARP-Plasma:ARP-OxHSA
mzspec:PXD023738:S4_19_48_45.mzXML:scan:9053:LVNEVTEFAK/2	ARP-Plasma:ARP-OxHSA
mzspec:PXD023738:S4_19_48_40.mzXML:scan:9186:LVNEVTEFAK/2	ARP-Plasma:ARP-OxHSA
mzspec:PXD023738:S4_19_48_40.mzXML:scan:9348:LVNEVTEFAK/2	ARP-Plasma:ARP-OxHSA
mzspec:PXD023738:S4_19_48_44.mzXML:scan:8890:LVNEVTEFAK/2	ARP-Plasma:ARP-OxHSA
mzspec:PXD023738:S4_19_48_43.mzXML:scan:7980:LVNEVTEFAK/2	ARP-Plasma:ARP-OxHSA
mzspec:PXD023738:S4_19_48_45.mzXML:scan:7879:LVNEVTEFAK/2	ARP-Plasma:ARP-OxHSA
mzspec:PXD023738:S4_19_48_40.mzXML:scan:9135:LVNEVTEFAK/2	ARP-Plasma:ARP-OxHSA
mzspec:PXD023738:S4_19_48_45.mzXML:scan:8322:LVNEVTEFAK/2	ARP-Plasma:ARP-OxHSA
mzspec:PXD023738:S4_19_48_43.mzXML:scan:9194:LVNEVTEFAK/2	ARP-Plasma:ARP-OxHSA
mzspec:PXD023738:S4_19_48_45.mzXML:scan:5864:LVNEVTEFAK/2	ARP-Plasma:ARP-OxHSA
mzspec:PXD023738:S4_19_48_42.mzXML:scan:9195:LVNEVTEFAK/2	ARP-Plasma:ARP-OxHSA
mzspec:PXD023738:S4_19_48_44.mzXML:scan:8538:LVNEVTEFAK/2	ARP-Plasma:ARP-OxHSA
mzspec:PXD023738:S4_19_48_43.mzXML:scan:5142:LVNEVTEFAK/2	ARP-Plasma:ARP-OxHSA
mzspec:PXD023738:S4_19_48_44.mzXML:scan:8600:LVNEVTEFAK/2	ARP-Plasma:ARP-OxHSA
mzspec:PXD023738:S4_19_48_45.mzXML:scan:8361:LVNEVTEFAK/2	ARP-Plasma:ARP-OxHSA
mzspec:PXD023738:S4_19_48_45.mzXML:scan:9073:LVNEVTEFAK/2	ARP-Plasma:ARP-OxHSA
mzspec:PXD023738:S4_19_48_43.mzXML:scan:8373:LVNEVTEFAK/2	ARP-Plasma:ARP-OxHSA
mzspec:PXD023738:S4_19_48_50.mzXML:scan:4205:LVNEVTEFAK/2	ARP-Plasma:ARP-OxHSA
mzspec:PXD023738:S4_19_48_47.mzXML:scan:322:LVNEVTEFAK/2	ARP-Plasma:ARP-OxHSA
mzspec:PXD023738:S4_19_48_42.mzXML:scan:4926:LVNEVTEFAK/2	ARP-Plasma:ARP-OxHSA
mzspec:PXD023738:S4_19_48_43.mzXML:scan:8601:LVNEVTEFAK/2	ARP-Plasma:ARP-OxHSA
mzspec:PXD023738:S4_19_48_45.mzXML:scan:8024:LVNEVTEFAK/2	ARP-Plasma:ARP-OxHSA
mzspec:PXD023738:S4_19_48_44.mzXML:scan:8745:LVNEVTEFAK/2	ARP-Plasma:ARP-OxHSA
mzspec:PXD023738:S4_19_48_40.mzXML:scan:4998:LVNEVTEFAK/2	ARP-Plasma:ARP-OxHSA
mzspec:PXD023738:S4_19_48_43.mzXML:scan:9240:LVNEVTEFAK/2	ARP-Plasma:ARP-OxHSA
mzspec:PXD023738:S4_19_48_43.mzXML:scan:8437:LVNEVTEFAK/2	ARP-Plasma:ARP-OxHSA
mzspec:PXD023738:S4_19_48_45.mzXML:scan:8906:LVNEVTEFAK/2	ARP-Plasma:ARP-OxHSA
mzspec:PXD023738:S4_19_48_44.mzXML:scan:9186:LVNEVTEFAK/2	ARP-Plasma:ARP-OxHSA
mzspec:PXD023738:S4_19_48_44.mzXML:scan:9157:LVNEVTEFAK/2	ARP-Plasma:ARP-OxHSA
mzspec:PXD023738:S4_19_48_42.mzXML:scan:6589:LVNEVTEFAK/2	ARP-Plasma:ARP-OxHSA
mzspec:PXD023738:S4_19_48_41.mzXML:scan:9180:LVNEVTEFAK/2	ARP-Plasma:ARP-OxHSA
mzspec:PXD023738:S4_19_48_44.mzXML:scan:8626:LVNEVTEFAK/2	ARP-Plasma:ARP-OxHSA
mzspec:PXD023738:S4_19_48_45.mzXML:scan:7660:LVNEVTEFAK/2	ARP-Plasma:ARP-OxHSA
mzspec:PXD023738:S4_19_48_42.mzXML:scan:7786:LVNEVTEFAK/2	ARP-Plasma:ARP-OxHSA
mzspec:PXD023738:S4_19_48_45.mzXML:scan:8149:LVNEVTEFAK/2	ARP-Plasma:ARP-OxHSA
mzspec:PXD023738:S4_19_48_44.mzXML:scan:8255:LVNEVTEFAK/2	ARP-Plasma:ARP-OxHSA
mzspec:PXD023738:S4_19_48_42.mzXML:scan:7121:LVNEVTEFAK/2	ARP-Plasma:ARP-OxHSA
mzspec:PXD023738:S4_19_48_44.mzXML:scan:6276:LVNEVTEFAK/2	ARP-Plasma:ARP-OxHSA
mzspec:PXD023738:S4_19_48_42.mzXML:scan:5443:LVNEVTEFAK/2	ARP-Plasma:ARP-OxHSA
mzspec:PXD023738:S4_19_48_41.mzXML:scan:9376:LVNEVTEFAK/2	ARP-Plasma:ARP-OxHSA
mzspec:PXD023738:S4_19_48_44.mzXML:scan:6883:LVNEVTEFAK/2	ARP-Plasma:ARP-OxHSA
mzspec:PXD023738:S4_19_48_43.mzXML:scan:8537:LVNEVTEFAK/2	ARP-Plasma:ARP-OxHSA
mzspec:PXD023738:S4_19_48_44.mzXML:scan:8368:LVNEVTEFAK/2	ARP-Plasma:ARP-OxHSA
mzspec:PXD023738:S4_19_48_44.mzXML:scan:8231:LVNEVTEFAK/2	ARP-Plasma:ARP-OxHSA
mzspec:PXD023738:S4_19_48_44.mzXML:scan:6856:LVNEVTEFAK/2	ARP-Plasma:ARP-OxHSA
mzspec:PXD023738:S4_19_48_43.mzXML:scan:8577:LVNEVTEFAK/2	ARP-Plasma:ARP-OxHSA
mzspec:PXD023738:S4_19_48_43.mzXML:scan:9107:LVNEVTEFAK/2	ARP-Plasma:ARP-OxHSA
mzspec:PXD023738:S4_19_48_44.mzXML:scan:8202:LVNEVTEFAK/2	ARP-Plasma:ARP-OxHSA
mzspec:PXD023738:S4_19_48_43.mzXML:scan:9039:LVNEVTEFAK/2	ARP-Plasma:ARP-OxHSA
mzspec:PXD023738:S4_19_48_42.mzXML:scan:9139:LVNEVTEFAK/2	ARP-Plasma:ARP-OxHSA
mzspec:PXD023738:S4_19_48_45.mzXML:scan:7784:LVNEVTEFAK/2	ARP-Plasma:ARP-OxHSA
mzspec:PXD023738:S4_19_48_43.mzXML:scan:9271:LVNEVTEFAK/2	ARP-Plasma:ARP-OxHSA
mzspec:PXD023738:S4_19_48_40.mzXML:scan:8696:LVNEVTEFAK/2	ARP-Plasma:ARP-OxHSA
mzspec:PXD023738:S4_19_48_45.mzXML:scan:9035:LVNEVTEFAK/2	ARP-Plasma:ARP-OxHSA
mzspec:PXD023738:S4_19_48_43.mzXML:scan:8190:LVNEVTEFAK/2	ARP-Plasma:ARP-OxHSA
mzspec:PXD023738:S4_19_48_44.mzXML:scan:6988:LVNEVTEFAK/2	ARP-Plasma:ARP-OxHSA
mzspec:PXD023738:S4_19_48_41.mzXML:scan:6449:LVNEVTEFAK/2	ARP-Plasma:ARP-OxHSA
mzspec:PXD023738:S4_19_48_44.mzXML:scan:7220:LVNEVTEFAK/2	ARP-Plasma:ARP-OxHSA
mzspec:PXD023738:S4_19_48_43.mzXML:scan:5720:LVNEVTEFAK/2	ARP-Plasma:ARP-OxHSA
mzspec:PXD023738:S4_19_48_40.mzXML:scan:8394:LVNEVTEFAK/2	ARP-Plasma:ARP-OxHSA
mzspec:PXD023738:S4_19_48_43.mzXML:scan:5480:LVNEVTEFAK/2	ARP-Plasma:ARP-OxHSA
mzspec:PXD023738:S4_19_48_43.mzXML:scan:5928:LVNEVTEFAK/2	ARP-Plasma:ARP-OxHSA
mzspec:PXD023738:S4_19_48_45.mzXML:scan:9330:LVNEVTEFAK/2	ARP-Plasma:ARP-OxHSA
mzspec:PXD023738:S4_19_48_44.mzXML:scan:8102:LVNEVTEFAK/2	ARP-Plasma:ARP-OxHSA
mzspec:PXD023738:S4_19_48_44.mzXML:scan:8686:LVNEVTEFAK/2	ARP-Plasma:ARP-OxHSA
mzspec:PXD023738:S4_19_48_43.mzXML:scan:9073:LVNEVTEFAK/2	ARP-Plasma:ARP-OxHSA
mzspec:PXD023738:S4_19_48_41.mzXML:scan:9062:LVNEVTEFAK/2	ARP-Plasma:ARP-OxHSA
mzspec:PXD023738:S4_19_48_44.mzXML:scan:9349:LVNEVTEFAK/2	ARP-Plasma:ARP-OxHSA
mzspec:PXD023738:S4_19_48_45.mzXML:scan:7991:LVNEVTEFAK/2	ARP-Plasma:ARP-OxHSA
mzspec:PXD023738:S4_19_48_44.mzXML:scan:9180:LVNEVTEFAK/2	ARP-Plasma:ARP-OxHSA
mzspec:PXD023738:S4_19_48_43.mzXML:scan:8967:LVNEVTEFAK/2	ARP-Plasma:ARP-OxHSA
mzspec:PXD023738:S4_19_48_40.mzXML:scan:8991:LVNEVTEFAK/2	ARP-Plasma:ARP-OxHSA
mzspec:PXD023738:S4_19_48_42.mzXML:scan:7137:LVNEVTEFAK/2	ARP-Plasma:ARP-OxHSA
mzspec:PXD023738:S4_19_48_44.mzXML:scan:7186:LVNEVTEFAK/2	ARP-Plasma:ARP-OxHSA
mzspec:PXD023738:S4_19_48_44.mzXML:scan:8924:LVNEVTEFAK/2	ARP-Plasma:ARP-OxHSA
mzspec:PXD023738:S4_19_48_45.mzXML:scan:8601:LVNEVTEFAK/2	ARP-Plasma:ARP-OxHSA
mzspec:PXD023738:S4_19_48_43.mzXML:scan:9003:LVNEVTEFAK/2	ARP-Plasma:ARP-OxHSA
mzspec:PXD023738:S4_19_48_43.mzXML:scan:8625:LVNEVTEFAK/2	ARP-Plasma:ARP-OxHSA
mzspec:PXD023738:S4_19_48_45.mzXML:scan:8967:LVNEVTEFAK/2	ARP-Plasma:ARP-OxHSA
mzspec:PXD023738:S4_19_48_45.mzXML:scan:8912:LVNEVTEFAK/2	ARP-Plasma:ARP-OxHSA
mzspec:PXD023738:S4_19_48_44.mzXML:scan:8084:LVNEVTEFAK/2	ARP-Plasma:ARP-OxHSA
mzspec:PXD023738:S4_19_48_41.mzXML:scan:7295:LVNEVTEFAK/2	ARP-Plasma:ARP-OxHSA
mzspec:PXD023738:S4_19_48_41.mzXML:scan:6769:LVNEVTEFAK/2	ARP-Plasma:ARP-OxHSA
mzspec:PXD023738:S4_19_48_44.mzXML:scan:7742:LVNEVTEFAK/2	ARP-Plasma:ARP-OxHSA
mzspec:PXD023738:S4_19_48_45.mzXML:scan:8143:LVNEVTEFAK/2	ARP-Plasma:ARP-OxHSA
mzspec:PXD023738:S4_19_48_45.mzXML:scan:8062:LVNEVTEFAK/2	ARP-Plasma:ARP-OxHSA
mzspec:PXD023738:S4_19_48_45.mzXML:scan:8420:LVNEVTEFAK/2	ARP-Plasma:ARP-OxHSA
mzspec:PXD023738:S4_19_48_43.mzXML:scan:8929:LVNEVTEFAK/2	ARP-Plasma:ARP-OxHSA
mzspec:PXD023738:S4_19_48_45.mzXML:scan:9097:LVNEVTEFAK/2	ARP-Plasma:ARP-OxHSA
mzspec:PXD023738:S4_19_48_44.mzXML:scan:7583:LVNEVTEFAK/2	ARP-Plasma:ARP-OxHSA
mzspec:PXD023738:S4_19_48_45.mzXML:scan:7554:LVNEVTEFAK/2	ARP-Plasma:ARP-OxHSA
mzspec:PXD023738:S4_19_48_45.mzXML:scan:7723:LVNEVTEFAK/2	ARP-Plasma:ARP-OxHSA
mzspec:PXD023738:S4_19_48_41.mzXML:scan:5462:LVNEVTEFAK/2	ARP-Plasma:ARP-OxHSA
mzspec:PXD023738:S4_19_48_42.mzXML:scan:6661:LVNEVTEFAK/2	ARP-Plasma:ARP-OxHSA
mzspec:PXD023738:S4_19_48_45.mzXML:scan:8930:LVNEVTEFAK/2	ARP-Plasma:ARP-OxHSA
mzspec:PXD023738:S4_19_48_41.mzXML:scan:8690:LVNEVTEFAK/2	ARP-Plasma:ARP-OxHSA
mzspec:PXD023738:S4_19_48_43.mzXML:scan:7937:LVNEVTEFAK/2	ARP-Plasma:ARP-OxHSA
mzspec:PXD023738:S4_19_48_44.mzXML:scan:8774:LVNEVTEFAK/2	ARP-Plasma:ARP-OxHSA
mzspec:PXD023738:S4_19_48_40.mzXML:scan:8166:LVNEVTEFAK/2	ARP-Plasma:ARP-OxHSA
mzspec:PXD023738:S4_19_48_42.mzXML:scan:9176:LVNEVTEFAK/2	ARP-Plasma:ARP-OxHSA
mzspec:PXD023738:S4_19_48_41.mzXML:scan:7226:LVNEVTEFAK/2	ARP-Plasma:ARP-OxHSA
mzspec:PXD023738:S4_19_48_42.mzXML:scan:7285:LVNEVTEFAK/2	ARP-Plasma:ARP-OxHSA
mzspec:PXD023738:S4_19_48_41.mzXML:scan:8096:LVNEVTEFAK/2	ARP-Plasma:ARP-OxHSA
mzspec:PXD023738:S4_19_48_45.mzXML:scan:7456:LVNEVTEFAK/2	ARP-Plasma:ARP-OxHSA
mzspec:PXD023738:S4_19_48_45.mzXML:scan:8638:LVNEVTEFAK/2	ARP-Plasma:ARP-OxHSA
mzspec:PXD023738:S4_19_48_44.mzXML:scan:8963:LVNEVTEFAK/2	ARP-Plasma:ARP-OxHSA
mzspec:PXD023738:S4_19_48_40.mzXML:scan:5085:LVNEVTEFAK/2	ARP-Plasma:ARP-OxHSA
mzspec:PXD023738:S4_19_48_42.mzXML:scan:5208:LVNEVTEFAK/2	ARP-Plasma:ARP-OxHSA
mzspec:PXD023738:S4_19_48_43.mzXML:scan:5826:LVNEVTEFAK/2	ARP-Plasma:ARP-OxHSA
mzspec:PXD023738:S4_19_48_42.mzXML:scan:9207:LVNEVTEFAK/2	ARP-Plasma:ARP-OxHSA
mzspec:PXD023738:S4_19_48_44.mzXML:scan:6678:LVNEVTEFAK/2	ARP-Plasma:ARP-OxHSA
mzspec:PXD023738:S4_19_48_43.mzXML:scan:8559:LVNEVTEFAK/2	ARP-Plasma:ARP-OxHSA
mzspec:PXD023738:S4_19_48_45.mzXML:scan:9347:LVNEVTEFAK/2	ARP-Plasma:ARP-OxHSA
mzspec:PXD023738:S4_19_48_45.mzXML:scan:8230:LVNEVTEFAK/2	ARP-Plasma:ARP-OxHSA
mzspec:PXD023738:S4_19_48_40.mzXML:scan:9205:LVNEVTEFAK/2	ARP-Plasma:ARP-OxHSA
mzspec:PXD023738:S4_19_48_43.mzXML:scan:9413:LVNEVTEFAK/2	ARP-Plasma:ARP-OxHSA
mzspec:PXD023738:S4_19_48_43.mzXML:scan:7746:LVNEVTEFAK/2	ARP-Plasma:ARP-OxHSA
mzspec:PXD023738:S4_19_48_45.mzXML:scan:8336:LVNEVTEFAK/2	ARP-Plasma:ARP-OxHSA
mzspec:PXD023738:S4_19_48_45.mzXML:scan:8070:LVNEVTEFAK/2	ARP-Plasma:ARP-OxHSA
mzspec:PXD023738:S4_19_48_42.mzXML:scan:6829:LVNEVTEFAK/2	ARP-Plasma:ARP-OxHSA
mzspec:PXD023738:S4_19_48_41.mzXML:scan:9250:LVNEVTEFAK/2	ARP-Plasma:ARP-OxHSA
mzspec:PXD023738:S4_19_48_44.mzXML:scan:7823:LVNEVTEFAK/2	ARP-Plasma:ARP-OxHSA
mzspec:PXD023738:S4_19_48_45.mzXML:scan:8302:LVNEVTEFAK/2	ARP-Plasma:ARP-OxHSA
mzspec:PXD023738:S4_19_48_44.mzXML:scan:7066:LVNEVTEFAK/2	ARP-Plasma:ARP-OxHSA
mzspec:PXD023738:S4_19_48_45.mzXML:scan:8552:LVNEVTEFAK/2	ARP-Plasma:ARP-OxHSA
mzspec:PXD023738:S4_19_48_40.mzXML:scan:5548:LVNEVTEFAK/2	ARP-Plasma:ARP-OxHSA
mzspec:PXD023738:S4_19_48_40.mzXML:scan:8239:LVNEVTEFAK/2	ARP-Plasma:ARP-OxHSA
mzspec:PXD023738:S4_19_48_43.mzXML:scan:4822:LVNEVTEFAK/2	ARP-Plasma:ARP-OxHSA
mzspec:PXD023738:S4_19_48_45.mzXML:scan:8950:LVNEVTEFAK/2	ARP-Plasma:ARP-OxHSA
mzspec:PXD023738:S4_19_48_41.mzXML:scan:8609:LVNEVTEFAK/2	ARP-Plasma:ARP-OxHSA
mzspec:PXD023738:S4_19_48_44.mzXML:scan:7926:LVNEVTEFAK/2	ARP-Plasma:ARP-OxHSA
mzspec:PXD023738:S4_19_48_44.mzXML:scan:7663:LVNEVTEFAK/2	ARP-Plasma:ARP-OxHSA
mzspec:PXD023738:S4_19_48_45.mzXML:scan:8193:LVNEVTEFAK/2	ARP-Plasma:ARP-OxHSA
mzspec:PXD023738:S4_19_48_43.mzXML:scan:7614:LVNEVTEFAK/2	ARP-Plasma:ARP-OxHSA
mzspec:PXD023738:S4_19_48_43.mzXML:scan:5461:LVNEVTEFAK/2	ARP-Plasma:ARP-OxHSA
mzspec:PXD023738:S4_19_48_44.mzXML:scan:7448:LVNEVTEFAK/2	ARP-Plasma:ARP-OxHSA
mzspec:PXD023738:S4_19_48_40.mzXML:scan:9044:LVNEVTEFAK/2	ARP-Plasma:ARP-OxHSA
mzspec:PXD023738:S4_19_48_45.mzXML:scan:9677:LVNEVTEFAK/2	ARP-Plasma:ARP-OxHSA
mzspec:PXD023738:S4_19_48_44.mzXML:scan:7499:LVNEVTEFAK/2	ARP-Plasma:ARP-OxHSA
mzspec:PXD023738:S4_19_48_45.mzXML:scan:8282:LVNEVTEFAK/2	ARP-Plasma:ARP-OxHSA
mzspec:PXD023738:S4_19_48_40.mzXML:scan:8200:LVNEVTEFAK/2	ARP-Plasma:ARP-OxHSA
mzspec:PXD023738:S4_19_48_42.mzXML:scan:9263:LVNEVTEFAK/2	ARP-Plasma:ARP-OxHSA
mzspec:PXD023738:S4_19_48_42.mzXML:scan:8625:LVNEVTEFAK/2	ARP-Plasma:ARP-OxHSA
mzspec:PXD023738:S4_19_48_41.mzXML:scan:7329:LVNEVTEFAK/2	ARP-Plasma:ARP-OxHSA
mzspec:PXD023738:S4_19_48_44.mzXML:scan:9085:LVNEVTEFAK/2	ARP-Plasma:ARP-OxHSA
mzspec:PXD023738:S4_19_48_40.mzXML:scan:8845:LVNEVTEFAK/2	ARP-Plasma:ARP-OxHSA
mzspec:PXD023738:S4_19_48_43.mzXML:scan:8799:LVNEVTEFAK/2	ARP-Plasma:ARP-OxHSA
mzspec:PXD023738:S4_19_48_45.mzXML:scan:7954:LVNEVTEFAK/2	ARP-Plasma:ARP-OxHSA
mzspec:PXD023738:S4_19_48_45.mzXML:scan:9001:LVNEVTEFAK/2	ARP-Plasma:ARP-OxHSA
mzspec:PXD023738:S4_19_48_45.mzXML:scan:8127:LVNEVTEFAK/2	ARP-Plasma:ARP-OxHSA
mzspec:PXD023738:S4_19_48_42.mzXML:scan:9949:LVNEVTEFAK/2	ARP-Plasma:ARP-OxHSA
mzspec:PXD023738:S4_19_48_41.mzXML:scan:7042:LVNEVTEFAK/2	ARP-Plasma:ARP-OxHSA
mzspec:PXD023738:S4_19_48_42.mzXML:scan:6503:LVNEVTEFAK/2	ARP-Plasma:ARP-OxHSA
mzspec:PXD023738:S4_19_48_44.mzXML:scan:8666:LVNEVTEFAK/2	ARP-Plasma:ARP-OxHSA
mzspec:PXD023738:S4_19_48_41.mzXML:scan:6909:LVNEVTEFAK/2	ARP-Plasma:ARP-OxHSA
mzspec:PXD023738:S4_19_48_45.mzXML:scan:8463:LVNEVTEFAK/2	ARP-Plasma:ARP-OxHSA
mzspec:PXD023738:S4_19_48_44.mzXML:scan:7839:LVNEVTEFAK/2	ARP-Plasma:ARP-OxHSA
mzspec:PXD023738:S4_19_48_44.mzXML:scan:6623:LVNEVTEFAK/2	ARP-Plasma:ARP-OxHSA
mzspec:PXD023738:S4_19_48_44.mzXML:scan:7682:LVNEVTEFAK/2	ARP-Plasma:ARP-OxHSA
mzspec:PXD023738:S4_19_48_45.mzXML:scan:8776:LVNEVTEFAK/2	ARP-Plasma:ARP-OxHSA
mzspec:PXD023738:S4_19_48_45.mzXML:scan:8848:LVNEVTEFAK/2	ARP-Plasma:ARP-OxHSA
mzspec:PXD023738:S4_19_48_45.mzXML:scan:7741:LVNEVTEFAK/2	ARP-Plasma:ARP-OxHSA
mzspec:PXD023738:S4_19_48_43.mzXML:scan:5864:LVNEVTEFAK/2	ARP-Plasma:ARP-OxHSA
mzspec:PXD023738:S4_19_48_44.mzXML:scan:4961:LVNEVTEFAK/2	ARP-Plasma:ARP-OxHSA
mzspec:PXD023738:S4_19_48_45.mzXML:scan:8214:LVNEVTEFAK/2	ARP-Plasma:ARP-OxHSA
mzspec:PXD023738:S4_19_48_44.mzXML:scan:9372:LVNEVTEFAK/2	ARP-Plasma:ARP-OxHSA
mzspec:PXD023738:S4_19_48_43.mzXML:scan:5621:LVNEVTEFAK/2	ARP-Plasma:ARP-OxHSA
mzspec:PXD023738:S4_19_48_44.mzXML:scan:7868:LVNEVTEFAK/2	ARP-Plasma:ARP-OxHSA
mzspec:PXD023738:S4_19_48_43.mzXML:scan:8541:LVNEVTEFAK/2	ARP-Plasma:ARP-OxHSA
mzspec:PXD023738:S4_19_48_43.mzXML:scan:9055:LVNEVTEFAK/2	ARP-Plasma:ARP-OxHSA
mzspec:PXD023738:S4_19_48_41.mzXML:scan:7947:LVNEVTEFAK/2	ARP-Plasma:ARP-OxHSA
mzspec:PXD023738:S4_19_48_42.mzXML:scan:8829:LVNEVTEFAK/2	ARP-Plasma:ARP-OxHSA
mzspec:PXD023738:S4_19_48_45.mzXML:scan:9367:LVNEVTEFAK/2	ARP-Plasma:ARP-OxHSA
mzspec:PXD023738:S4_19_48_43.mzXML:scan:8949:LVNEVTEFAK/2	ARP-Plasma:ARP-OxHSA
mzspec:PXD023738:S4_19_48_40.mzXML:scan:8932:LVNEVTEFAK/2	ARP-Plasma:ARP-OxHSA
mzspec:PXD023738:S4_19_48_41.mzXML:scan:6951:LVNEVTEFAK/2	ARP-Plasma:ARP-OxHSA
mzspec:PXD023738:S4_19_48_41.mzXML:scan:6567:LVNEVTEFAK/2	ARP-Plasma:ARP-OxHSA
mzspec:PXD023738:S4_19_48_41.mzXML:scan:8243:LVNEVTEFAK/2	ARP-Plasma:ARP-OxHSA
mzspec:PXD023738:S4_19_48_44.mzXML:scan:9891:LVNEVTEFAK/2	ARP-Plasma:ARP-OxHSA
mzspec:PXD023738:S4_19_48_43.mzXML:scan:5947:LVNEVTEFAK/2	ARP-Plasma:ARP-OxHSA
mzspec:PXD023738:S4_19_48_45.mzXML:scan:8266:LVNEVTEFAK/2	ARP-Plasma:ARP-OxHSA
mzspec:PXD023738:S4_19_48_42.mzXML:scan:7709:LVNEVTEFAK/2	ARP-Plasma:ARP-OxHSA
mzspec:PXD023738:S4_19_48_50.mzXML:scan:321:LVNEVTEFAK/2	ARP-Plasma:ARP-OxHSA
mzspec:PXD023738:S4_19_48_44.mzXML:scan:9442:LVNEVTEFAK/2	ARP-Plasma:ARP-OxHSA
mzspec:PXD023738:S4_19_48_45.mzXML:scan:8486:LVNEVTEFAK/2	ARP-Plasma:ARP-OxHSA
mzspec:PXD023738:S4_19_48_45.mzXML:scan:5554:LVNEVTEFAK/2	ARP-Plasma:ARP-OxHSA
mzspec:PXD023738:S4_19_48_40.mzXML:scan:5307:LVNEVTEFAK/2	ARP-Plasma:ARP-OxHSA
mzspec:PXD023738:S4_19_48_43.mzXML:scan:8892:LVNEVTEFAK/2	ARP-Plasma:ARP-OxHSA
mzspec:PXD023738:S4_19_48_40.mzXML:scan:7048:LVNEVTEFAK/2	ARP-Plasma:ARP-OxHSA
mzspec:PXD023738:S4_19_48_44.mzXML:scan:6350:LVNEVTEFAK/2	ARP-Plasma:ARP-OxHSA
mzspec:PXD023738:S4_19_48_40.mzXML:scan:8222:LVNEVTEFAK/2	ARP-Plasma:ARP-OxHSA
mzspec:PXD023738:S4_19_48_44.mzXML:scan:8045:LVNEVTEFAK/2	ARP-Plasma:ARP-OxHSA
mzspec:PXD023738:S4_19_48_45.mzXML:scan:8480:LVNEVTEFAK/2	ARP-Plasma:ARP-OxHSA
mzspec:PXD023738:S4_19_48_44.mzXML:scan:7344:LVNEVTEFAK/2	ARP-Plasma:ARP-OxHSA
mzspec:PXD023738:S4_19_48_45.mzXML:scan:7536:LVNEVTEFAK/2	ARP-Plasma:ARP-OxHSA
mzspec:PXD023738:S4_19_48_43.mzXML:scan:9126:LVNEVTEFAK/2	ARP-Plasma:ARP-OxHSA
mzspec:PXD023738:S4_19_48_45.mzXML:scan:7972:LVNEVTEFAK/2	ARP-Plasma:ARP-OxHSA
mzspec:PXD023738:S4_19_48_44.mzXML:scan:7131:LVNEVTEFAK/2	ARP-Plasma:ARP-OxHSA
mzspec:PXD023738:S4_19_48_42.mzXML:scan:9373:LVNEVTEFAK/2	ARP-Plasma:ARP-OxHSA
mzspec:PXD023738:S4_19_48_44.mzXML:scan:8763:LVNEVTEFAK/2	ARP-Plasma:ARP-OxHSA
mzspec:PXD023738:S4_19_48_40.mzXML:scan:9062:LVNEVTEFAK/2	ARP-Plasma:ARP-OxHSA
mzspec:PXD023738:S4_19_48_45.mzXML:scan:9255:LVNEVTEFAK/2	ARP-Plasma:ARP-OxHSA
mzspec:PXD023738:S4_19_48_42.mzXML:scan:7018:LVNEVTEFAK/2	ARP-Plasma:ARP-OxHSA
mzspec:PXD023738:S4_19_48_40.mzXML:scan:8908:LVNEVTEFAK/2	ARP-Plasma:ARP-OxHSA
mzspec:PXD023738:S4_19_48_44.mzXML:scan:6433:LVNEVTEFAK/2	ARP-Plasma:ARP-OxHSA
mzspec:PXD023738:S4_19_48_42.mzXML:scan:8961:LVNEVTEFAK/2	ARP-Plasma:ARP-OxHSA
mzspec:PXD023738:S4_19_48_41.mzXML:scan:5336:LVNEVTEFAK/2	ARP-Plasma:ARP-OxHSA
mzspec:PXD023738:S4_19_48_43.mzXML:scan:8774:LVNEVTEFAK/2	ARP-Plasma:ARP-OxHSA
mzspec:PXD023738:S4_19_48_44.mzXML:scan:7702:LVNEVTEFAK/2	ARP-Plasma:ARP-OxHSA
mzspec:PXD023738:S4_19_48_43.mzXML:scan:8275:LVNEVTEFAK/2	ARP-Plasma:ARP-OxHSA
mzspec:PXD023738:S4_19_48_45.mzXML:scan:8829:LVNEVTEFAK/2	ARP-Plasma:ARP-OxHSA
mzspec:PXD023738:S4_19_48_43.mzXML:scan:5909:LVNEVTEFAK/2	ARP-Plasma:ARP-OxHSA
mzspec:PXD023738:S4_19_48_45.mzXML:scan:8738:LVNEVTEFAK/2	ARP-Plasma:ARP-OxHSA
mzspec:PXD023738:S4_19_48_45.mzXML:scan:9199:LVNEVTEFAK/2	ARP-Plasma:ARP-OxHSA
mzspec:PXD023738:S4_19_48_43.mzXML:scan:7864:LVNEVTEFAK/2	ARP-Plasma:ARP-OxHSA
mzspec:PXD023738:S4_19_48_42.mzXML:scan:9305:LVNEVTEFAK/2	ARP-Plasma:ARP-OxHSA
mzspec:PXD023738:S4_19_48_40.mzXML:scan:7092:LVNEVTEFAK/2	ARP-Plasma:ARP-OxHSA
mzspec:PXD023738:S4_19_48_45.mzXML:scan:8983:LVNEVTEFAK/2	ARP-Plasma:ARP-OxHSA
mzspec:PXD023738:S4_19_48_41.mzXML:scan:9198:LVNEVTEFAK/2	ARP-Plasma:ARP-OxHSA
mzspec:PXD023738:S4_19_48_42.mzXML:scan:6711:LVNEVTEFAK/2	ARP-Plasma:ARP-OxHSA
mzspec:PXD023738:S4_19_48_44.mzXML:scan:8563:LVNEVTEFAK/2	ARP-Plasma:ARP-OxHSA
mzspec:PXD023738:S4_19_48_45.mzXML:scan:7591:LVNEVTEFAK/2	ARP-Plasma:ARP-OxHSA
mzspec:PXD023738:S4_19_48_44.mzXML:scan:8990:LVNEVTEFAK/2	ARP-Plasma:ARP-OxHSA
mzspec:PXD023738:S4_19_48_41.mzXML:scan:9234:LVNEVTEFAK/2	ARP-Plasma:ARP-OxHSA
mzspec:PXD023738:S4_19_48_43.mzXML:scan:5844:LVNEVTEFAK/2	ARP-Plasma:ARP-OxHSA
mzspec:PXD023738:S4_19_48_41.mzXML:scan:9356:LVNEVTEFAK/2	ARP-Plasma:ARP-OxHSA
mzspec:PXD023738:S4_19_48_44.mzXML:scan:6377:LVNEVTEFAK/2	ARP-Plasma:ARP-OxHSA
mzspec:PXD023738:S4_19_48_42.mzXML:scan:7789:LVNEVTEFAK/2	ARP-Plasma:ARP-OxHSA
mzspec:PXD023738:S4_19_48_44.mzXML:scan:8423:LVNEVTEFAK/2	ARP-Plasma:ARP-OxHSA
mzspec:PXD023738:S4_19_48_42.mzXML:scan:6882:LVNEVTEFAK/2	ARP-Plasma:ARP-OxHSA
mzspec:PXD023738:S4_19_48_44.mzXML:scan:9121:LVNEVTEFAK/2	ARP-Plasma:ARP-OxHSA
mzspec:PXD023738:S4_19_48_44.mzXML:scan:6529:LVNEVTEFAK/2	ARP-Plasma:ARP-OxHSA
mzspec:PXD023738:S4_19_48_44.mzXML:scan:9014:LVNEVTEFAK/2	ARP-Plasma:ARP-OxHSA
mzspec:PXD023738:S4_19_48_45.mzXML:scan:8697:LVNEVTEFAK/2	ARP-Plasma:ARP-OxHSA
mzspec:PXD023738:S4_19_48_44.mzXML:scan:6954:LVNEVTEFAK/2	ARP-Plasma:ARP-OxHSA
mzspec:PXD023738:S4_19_48_43.mzXML:scan:7922:LVNEVTEFAK/2	ARP-Plasma:ARP-OxHSA
mzspec:PXD023738:S4_19_48_41.mzXML:scan:6519:LVNEVTEFAK/2	ARP-Plasma:ARP-OxHSA
mzspec:PXD023738:S4_19_48_40.mzXML:scan:7108:LVNEVTEFAK/2	ARP-Plasma:ARP-OxHSA
mzspec:PXD023738:S4_19_48_44.mzXML:scan:5173:LVNEVTEFAK/2	ARP-Plasma:ARP-OxHSA
mzspec:PXD023738:S4_19_48_44.mzXML:scan:7309:LVNEVTEFAK/2	ARP-Plasma:ARP-OxHSA
mzspec:PXD023738:S4_19_48_43.mzXML:scan:9223:LVNEVTEFAK/2	ARP-Plasma:ARP-OxHSA
mzspec:PXD023738:S4_19_48_44.mzXML:scan:8607:LVNEVTEFAK/2	ARP-Plasma:ARP-OxHSA
mzspec:PXD023738:S4_19_48_40.mzXML:scan:5367:LVNEVTEFAK/2	ARP-Plasma:ARP-OxHSA
mzspec:PXD023738:S4_19_48_42.mzXML:scan:9355:LVNEVTEFAK/2	ARP-Plasma:ARP-OxHSA
mzspec:PXD023738:S4_19_48_45.mzXML:scan:7804:LVNEVTEFAK/2	ARP-Plasma:ARP-OxHSA
mzspec:PXD023738:S4_19_48_42.mzXML:scan:7817:LVNEVTEFAK/2	ARP-Plasma:ARP-OxHSA
mzspec:PXD023738:S4_19_48_45.mzXML:scan:9273:LVNEVTEFAK/2	ARP-Plasma:ARP-OxHSA
mzspec:PXD023738:S4_19_48_43.mzXML:scan:8736:LVNEVTEFAK/2	ARP-Plasma:ARP-OxHSA
mzspec:PXD023738:S4_19_48_44.mzXML:scan:8535:LVNEVTEFAK/2	ARP-Plasma:ARP-OxHSA
mzspec:PXD023738:S4_19_48_44.mzXML:scan:7799:LVNEVTEFAK/2	ARP-Plasma:ARP-OxHSA
mzspec:PXD023738:S4_19_48_41.mzXML:scan:8941:LVNEVTEFAK/2	ARP-Plasma:ARP-OxHSA
mzspec:PXD023738:S4_19_48_44.mzXML:scan:8306:LVNEVTEFAK/2	ARP-Plasma:ARP-OxHSA
mzspec:PXD023738:S4_19_48_41.mzXML:scan:8365:LVNEVTEFAK/2	ARP-Plasma:ARP-OxHSA
mzspec:PXD023738:S4_19_48_44.mzXML:scan:9009:LVNEVTEFAK/2	ARP-Plasma:ARP-OxHSA
mzspec:PXD023738:S4_19_48_44.mzXML:scan:6467:LVNEVTEFAK/2	ARP-Plasma:ARP-OxHSA
mzspec:PXD023738:S4_19_48_44.mzXML:scan:8385:LVNEVTEFAK/2	ARP-Plasma:ARP-OxHSA
mzspec:PXD023738:S4_19_48_41.mzXML:scan:8545:LVNEVTEFAK/2	ARP-Plasma:ARP-OxHSA
mzspec:PXD023738:S4_19_48_41.mzXML:scan:9093:LVNEVTEFAK/2	ARP-Plasma:ARP-OxHSA
mzspec:PXD023738:S4_19_48_40.mzXML:scan:9327:LVNEVTEFAK/2	ARP-Plasma:ARP-OxHSA
mzspec:PXD023738:S4_19_48_44.mzXML:scan:6971:LVNEVTEFAK/2	ARP-Plasma:ARP-OxHSA
mzspec:PXD023738:S4_19_48_45.mzXML:scan:9719:LVNEVTEFAK/2	ARP-Plasma:ARP-OxHSA
mzspec:PXD023738:S4_19_48_41.mzXML:scan:7926:LVNEVTEFAK/2	ARP-Plasma:ARP-OxHSA
mzspec:PXD023738:S4_19_48_45.mzXML:scan:9870:LVNEVTEFAK/2	ARP-Plasma:ARP-OxHSA
mzspec:PXD023738:S4_19_48_41.mzXML:scan:9281:LVNEVTEFAK/2	ARP-Plasma:ARP-OxHSA
mzspec:PXD023738:S4_19_48_40.mzXML:scan:6074:LVNEVTEFAK/2	ARP-Plasma:ARP-OxHSA
mzspec:PXD023738:S4_19_48_42.mzXML:scan:7000:LVNEVTEFAK/2	ARP-Plasma:ARP-OxHSA
mzspec:PXD023738:S4_19_48_41.mzXML:scan:9147:LVNEVTEFAK/2	ARP-Plasma:ARP-OxHSA
mzspec:PXD023738:S4_19_48_44.mzXML:scan:8286:LVNEVTEFAK/2	ARP-Plasma:ARP-OxHSA
mzspec:PXD023738:S4_19_48_40.mzXML:scan:7842:LVNEVTEFAK/2	ARP-Plasma:ARP-OxHSA
mzspec:PXD023738:S4_19_48_40.mzXML:scan:8020:LVNEVTEFAK/2	ARP-Plasma:ARP-OxHSA
mzspec:PXD023738:S4_19_48_45.mzXML:scan:9522:LVNEVTEFAK/2	ARP-Plasma:ARP-OxHSA
mzspec:PXD023738:S4_19_48_44.mzXML:scan:8126:LVNEVTEFAK/2	ARP-Plasma:ARP-OxHSA
mzspec:PXD023738:S4_19_48_43.mzXML:scan:9891:LVNEVTEFAK/2	ARP-Plasma:ARP-OxHSA
mzspec:PXD023738:S4_19_48_42.mzXML:scan:7929:LVNEVTEFAK/2	ARP-Plasma:ARP-OxHSA
mzspec:PXD023738:S4_19_48_44.mzXML:scan:6152:LVNEVTEFAK/2	ARP-Plasma:ARP-OxHSA
mzspec:PXD023738:S4_19_48_43.mzXML:scan:9200:LVNEVTEFAK/2	ARP-Plasma:ARP-OxHSA
mzspec:PXD023738:S4_19_48_43.mzXML:scan:7904:LVNEVTEFAK/2	ARP-Plasma:ARP-OxHSA
mzspec:PXD023738:S4_19_48_44.mzXML:scan:7326:LVNEVTEFAK/2	ARP-Plasma:ARP-OxHSA
mzspec:PXD023738:S4_19_48_42.mzXML:scan:6897:LVNEVTEFAK/2	ARP-Plasma:ARP-OxHSA
mzspec:PXD023738:S4_19_48_45.mzXML:scan:4924:LVNEVTEFAK/2	ARP-Plasma:ARP-OxHSA
mzspec:PXD023738:S4_19_48_45.mzXML:scan:8757:LVNEVTEFAK/2	ARP-Plasma:ARP-OxHSA
mzspec:PXD023738:S4_19_48_44.mzXML:scan:7758:LVNEVTEFAK/2	ARP-Plasma:ARP-OxHSA
mzspec:PXD023738:S4_19_48_43.mzXML:scan:9163:LVNEVTEFAK/2	ARP-Plasma:ARP-OxHSA
mzspec:PXD023738:S4_19_48_42.mzXML:scan:7440:LVNEVTEFAK/2	ARP-Plasma:ARP-OxHSA
mzspec:PXD023738:S4_19_48_41.mzXML:scan:7183:LVNEVTEFAK/2	ARP-Plasma:ARP-OxHSA
mzspec:PXD023738:S4_19_48_42.mzXML:scan:6759:LVNEVTEFAK/2	ARP-Plasma:ARP-OxHSA
mzspec:PXD023738:S4_19_48_41.mzXML:scan:5515:LVNEVTEFAK/2	ARP-Plasma:ARP-OxHSA
mzspec:PXD023738:S4_19_48_43.mzXML:scan:7958:LVNEVTEFAK/2	ARP-Plasma:ARP-OxHSA
mzspec:PXD023738:S4_19_48_40.mzXML:scan:9112:LVNEVTEFAK/2	ARP-Plasma:ARP-OxHSA
mzspec:PXD023738:S4_19_48_44.mzXML:scan:8783:LVNEVTEFAK/2	ARP-Plasma:ARP-OxHSA
mzspec:PXD023738:S4_19_48_41.mzXML:scan:9418:LVNEVTEFAK/2	ARP-Plasma:ARP-OxHSA
mzspec:PXD023738:S4_19_48_44.mzXML:scan:6158:LVNEVTEFAK/2	ARP-Plasma:ARP-OxHSA
mzspec:PXD023738:S4_19_48_45.mzXML:scan:8501:LVNEVTEFAK/2	ARP-Plasma:ARP-OxHSA
mzspec:PXD023738:S4_19_48_44.mzXML:scan:8349:LVNEVTEFAK/2	ARP-Plasma:ARP-OxHSA
mzspec:PXD023738:S4_19_48_41.mzXML:scan:9373:LVNEVTEFAK/2	ARP-Plasma:ARP-OxHSA
mzspec:PXD023738:S4_19_48_40.mzXML:scan:9250:LVNEVTEFAK/2	ARP-Plasma:ARP-OxHSA
mzspec:PXD023738:S4_19_48_42.mzXML:scan:8514:LVNEVTEFAK/2	ARP-Plasma:ARP-OxHSA
mzspec:PXD023738:S4_19_48_45.mzXML:scan:8675:LVNEVTEFAK/2	ARP-Plasma:ARP-OxHSA
mzspec:PXD023738:S4_19_48_41.mzXML:scan:9340:LVNEVTEFAK/2	ARP-Plasma:ARP-OxHSA
mzspec:PXD023738:S4_19_48_42.mzXML:scan:8981:LVNEVTEFAK/2	ARP-Plasma:ARP-OxHSA
mzspec:PXD023738:S4_19_48_42.mzXML:scan:9410:LVNEVTEFAK/2	ARP-Plasma:ARP-OxHSA
mzspec:PXD023738:S4_19_48_43.mzXML:scan:7878:LVNEVTEFAK/2	ARP-Plasma:ARP-OxHSA
mzspec:PXD023738:S4_19_48_43.mzXML:scan:7578:LVNEVTEFAK/2	ARP-Plasma:ARP-OxHSA
mzspec:PXD023738:S4_19_48_44.mzXML:scan:7945:LVNEVTEFAK/2	ARP-Plasma:ARP-OxHSA
mzspec:PXD023738:S4_19_48_44.mzXML:scan:9356:LVNEVTEFAK/2	ARP-Plasma:ARP-OxHSA
mzspec:PXD023738:S4_19_48_43.mzXML:scan:8050:LVNEVTEFAK/2	ARP-Plasma:ARP-OxHSA
mzspec:PXD023738:S4_19_48_40.mzXML:scan:8608:LVNEVTEFAK/2	ARP-Plasma:ARP-OxHSA
mzspec:PXD023738:S4_19_48_42.mzXML:scan:7836:LVNEVTEFAK/2	ARP-Plasma:ARP-OxHSA
mzspec:PXD023738:S4_19_48_45.mzXML:scan:7609:LVNEVTEFAK/2	ARP-Plasma:ARP-OxHSA
mzspec:PXD023738:S4_19_48_42.mzXML:scan:7502:LVNEVTEFAK/2	ARP-Plasma:ARP-OxHSA
mzspec:PXD023738:S4_19_48_44.mzXML:scan:7083:LVNEVTEFAK/2	ARP-Plasma:ARP-OxHSA
mzspec:PXD023738:S4_19_48_44.mzXML:scan:9661:LVNEVTEFAK/2	ARP-Plasma:ARP-OxHSA
mzspec:PXD023738:S4_19_48_45.mzXML:scan:9901:LVNEVTEFAK/2	ARP-Plasma:ARP-OxHSA
mzspec:PXD023738:S4_19_48_42.mzXML:scan:9338:LVNEVTEFAK/2	ARP-Plasma:ARP-OxHSA
mzspec:PXD023738:S4_19_48_45.mzXML:scan:9769:LVNEVTEFAK/2	ARP-Plasma:ARP-OxHSA
mzspec:PXD023738:S4_19_48_41.mzXML:scan:7245:LVNEVTEFAK/2	ARP-Plasma:ARP-OxHSA
mzspec:PXD023738:S4_19_48_45.mzXML:scan:7480:LVNEVTEFAK/2	ARP-Plasma:ARP-OxHSA
mzspec:PXD023738:S4_19_48_43.mzXML:scan:7672:LVNEVTEFAK/2	ARP-Plasma:ARP-OxHSA
mzspec:PXD023738:S4_19_48_44.mzXML:scan:6733:LVNEVTEFAK/2	ARP-Plasma:ARP-OxHSA
mzspec:PXD023738:S4_19_48_45.mzXML:scan:7679:LVNEVTEFAK/2	ARP-Plasma:ARP-OxHSA
mzspec:PXD023738:S4_19_48_40.mzXML:scan:8673:LVNEVTEFAK/2	ARP-Plasma:ARP-OxHSA
mzspec:PXD023738:S4_19_48_44.mzXML:scan:8680:LVNEVTEFAK/2	ARP-Plasma:ARP-OxHSA
mzspec:PXD023738:S4_19_48_44.mzXML:scan:6587:LVNEVTEFAK/2	ARP-Plasma:ARP-OxHSA
mzspec:PXD023738:S4_19_48_41.mzXML:scan:9022:LVNEVTEFAK/2	ARP-Plasma:ARP-OxHSA
mzspec:PXD023738:S4_19_48_42.mzXML:scan:8792:LVNEVTEFAK/2	ARP-Plasma:ARP-OxHSA
mzspec:PXD023738:S4_19_48_45.mzXML:scan:7738:LVNEVTEFAK/2	ARP-Plasma:ARP-OxHSA
mzspec:PXD023738:S4_19_48_45.mzXML:scan:9147:LVNEVTEFAK/2	ARP-Plasma:ARP-OxHSA
mzspec:PXD023738:S4_19_48_41.mzXML:scan:7165:LVNEVTEFAK/2	ARP-Plasma:ARP-OxHSA
mzspec:PXD023738:S4_19_48_45.mzXML:scan:5882:LVNEVTEFAK/2	ARP-Plasma:ARP-OxHSA
mzspec:PXD023738:S4_19_48_40.mzXML:scan:8342:LVNEVTEFAK/2	ARP-Plasma:ARP-OxHSA
mzspec:PXD023738:S4_19_48_43.mzXML:scan:9338:LVNEVTEFAK/2	ARP-Plasma:ARP-OxHSA
mzspec:PXD023738:S4_19_48_42.mzXML:scan:8755:LVNEVTEFAK/2	ARP-Plasma:ARP-OxHSA
mzspec:PXD023738:S4_19_48_44.mzXML:scan:7481:LVNEVTEFAK/2	ARP-Plasma:ARP-OxHSA
mzspec:PXD023738:S4_19_48_43.mzXML:scan:7597:LVNEVTEFAK/2	ARP-Plasma:ARP-OxHSA
mzspec:PXD023738:S4_19_48_42.mzXML:scan:7874:LVNEVTEFAK/2	ARP-Plasma:ARP-OxHSA
mzspec:PXD023738:S4_19_48_44.mzXML:scan:9070:LVNEVTEFAK/2	ARP-Plasma:ARP-OxHSA
mzspec:PXD023738:S4_19_48_43.mzXML:scan:8872:LVNEVTEFAK/2	ARP-Plasma:ARP-OxHSA
mzspec:PXD023738:S4_19_48_44.mzXML:scan:8186:LVNEVTEFAK/2	ARP-Plasma:ARP-OxHSA
mzspec:PXD023738:S4_19_48_44.mzXML:scan:6524:LVNEVTEFAK/2	ARP-Plasma:ARP-OxHSA
mzspec:PXD023738:S4_19_48_44.mzXML:scan:8404:LVNEVTEFAK/2	ARP-Plasma:ARP-OxHSA
mzspec:PXD023738:S4_19_48_44.mzXML:scan:8941:LVNEVTEFAK/2	ARP-Plasma:ARP-OxHSA
mzspec:PXD023738:S4_19_48_42.mzXML:scan:7899:LVNEVTEFAK/2	ARP-Plasma:ARP-OxHSA
mzspec:PXD023738:S4_19_48_41.mzXML:scan:9411:LVNEVTEFAK/2	ARP-Plasma:ARP-OxHSA
mzspec:PXD023738:S4_19_48_42.mzXML:scan:9123:LVNEVTEFAK/2	ARP-Plasma:ARP-OxHSA
mzspec:PXD023738:S4_19_48_41.mzXML:scan:4909:LVNEVTEFAK/2	ARP-Plasma:ARP-OxHSA
mzspec:PXD023738:S4_19_48_44.mzXML:scan:7277:LVNEVTEFAK/2	ARP-Plasma:ARP-OxHSA
mzspec:PXD023738:S4_19_48_44.mzXML:scan:8517:LVNEVTEFAK/2	ARP-Plasma:ARP-OxHSA
mzspec:PXD023738:S4_19_48_43.mzXML:scan:7712:LVNEVTEFAK/2	ARP-Plasma:ARP-OxHSA
mzspec:PXD023738:S4_19_48_44.mzXML:scan:8221:LVNEVTEFAK/2	ARP-Plasma:ARP-OxHSA
mzspec:PXD023738:S4_19_48_40.mzXML:scan:7865:LVNEVTEFAK/2	ARP-Plasma:ARP-OxHSA
mzspec:PXD023738:S4_19_48_44.mzXML:scan:7040:LVNEVTEFAK/2	ARP-Plasma:ARP-OxHSA
mzspec:PXD023738:S4_19_48_42.mzXML:scan:5303:LVNEVTEFAK/2	ARP-Plasma:ARP-OxHSA
mzspec:PXD023738:S4_19_48_45.mzXML:scan:8253:LVNEVTEFAK/2	ARP-Plasma:ARP-OxHSA
mzspec:PXD023738:S4_19_48_42.mzXML:scan:9393:LVNEVTEFAK/2	ARP-Plasma:ARP-OxHSA
mzspec:PXD023738:S4_19_48_40.mzXML:scan:5854:LVNEVTEFAK/2	ARP-Plasma:ARP-OxHSA
mzspec:PXD023738:S4_19_48_41.mzXML:scan:8192:LVNEVTEFAK/2	ARP-Plasma:ARP-OxHSA
mzspec:PXD023738:S4_19_48_45.mzXML:scan:7710:LVNEVTEFAK/2	ARP-Plasma:ARP-OxHSA
mzspec:PXD023738:S4_19_48_45.mzXML:scan:7821:LVNEVTEFAK/2	ARP-Plasma:ARP-OxHSA
mzspec:PXD023738:S4_19_48_45.mzXML:scan:9131:LVNEVTEFAK/2	ARP-Plasma:ARP-OxHSA
mzspec:PXD023738:S4_19_48_41.mzXML:scan:8575:LVNEVTEFAK/2	ARP-Plasma:ARP-OxHSA
mzspec:PXD023738:S4_19_48_45.mzXML:scan:8682:LVNEVTEFAK/2	ARP-Plasma:ARP-OxHSA
mzspec:PXD023738:S4_19_48_42.mzXML:scan:9321:LVNEVTEFAK/2	ARP-Plasma:ARP-OxHSA
mzspec:PXD023738:S4_19_48_45.mzXML:scan:8568:LVNEVTEFAK/2	ARP-Plasma:ARP-OxHSA
mzspec:PXD023738:S4_19_48_44.mzXML:scan:6662:LVNEVTEFAK/2	ARP-Plasma:ARP-OxHSA
mzspec:PXD023738:S4_19_48_42.mzXML:scan:5587:LVNEVTEFAK/2	ARP-Plasma:ARP-OxHSA
mzspec:PXD023738:S4_19_48_41.mzXML:scan:8804:LVNEVTEFAK/2	ARP-Plasma:ARP-OxHSA
mzspec:PXD023738:S4_19_48_44.mzXML:scan:8557:LVNEVTEFAK/2	ARP-Plasma:ARP-OxHSA
mzspec:PXD023738:S4_19_48_43.mzXML:scan:8640:LVNEVTEFAK/2	ARP-Plasma:ARP-OxHSA
mzspec:PXD023738:S4_19_48_43.mzXML:scan:9656:LVNEVTEFAK/2	ARP-Plasma:ARP-OxHSA
mzspec:PXD023738:S4_19_48_44.mzXML:scan:8885:LVNEVTEFAK/2	ARP-Plasma:ARP-OxHSA
mzspec:PXD023738:S4_19_48_43.mzXML:scan:7691:LVNEVTEFAK/2	ARP-Plasma:ARP-OxHSA
mzspec:PXD023738:S4_19_48_40.mzXML:scan:9094:LVNEVTEFAK/2	ARP-Plasma:ARP-OxHSA
mzspec:PXD023738:S4_19_48_44.mzXML:scan:6565:LVNEVTEFAK/2	ARP-Plasma:ARP-OxHSA
mzspec:PXD023738:S4_19_48_43.mzXML:scan:5567:LVNEVTEFAK/2	ARP-Plasma:ARP-OxHSA
mzspec:PXD023738:S4_19_48_42.mzXML:scan:6811:LVNEVTEFAK/2	ARP-Plasma:ARP-OxHSA
mzspec:PXD023738:S4_19_48_42.mzXML:scan:7547:LVNEVTEFAK/2	ARP-Plasma:ARP-OxHSA
mzspec:PXD023738:S4_19_48_41.mzXML:scan:7670:LVNEVTEFAK/2	ARP-Plasma:ARP-OxHSA
mzspec:PXD023738:S4_19_48_44.mzXML:scan:9313:LVNEVTEFAK/2	ARP-Plasma:ARP-OxHSA
mzspec:PXD023738:S4_19_48_42.mzXML:scan:8353:LVNEVTEFAK/2	ARP-Plasma:ARP-OxHSA
mzspec:PXD023738:S4_19_48_41.mzXML:scan:6889:LVNEVTEFAK/2	ARP-Plasma:ARP-OxHSA
mzspec:PXD023738:S4_19_48_43.mzXML:scan:9255:LVNEVTEFAK/2	ARP-Plasma:ARP-OxHSA
mzspec:PXD023738:S4_19_48_41.mzXML:scan:8922:LVNEVTEFAK/2	ARP-Plasma:ARP-OxHSA
mzspec:PXD023738:S4_19_48_40.mzXML:scan:8560:LVNEVTEFAK/2	ARP-Plasma:ARP-OxHSA
mzspec:PXD023738:S4_19_48_41.mzXML:scan:6971:LVNEVTEFAK/2	ARP-Plasma:ARP-OxHSA
mzspec:PXD023738:S4_19_48_40.mzXML:scan:9016:LVNEVTEFAK/2	ARP-Plasma:ARP-OxHSA
mzspec:PXD023738:S4_19_48_44.mzXML:scan:6583:LVNEVTEFAK/2	ARP-Plasma:ARP-OxHSA
mzspec:PXD023738:S4_19_48_43.mzXML:scan:8312:LVNEVTEFAK/2	ARP-Plasma:ARP-OxHSA
mzspec:PXD023738:S4_19_48_41.mzXML:scan:9047:LVNEVTEFAK/2	ARP-Plasma:ARP-OxHSA
mzspec:PXD023738:S4_19_48_42.mzXML:scan:6643:LVNEVTEFAK/2	ARP-Plasma:ARP-OxHSA
mzspec:PXD023738:S4_19_48_44.mzXML:scan:6897:LVNEVTEFAK/2	ARP-Plasma:ARP-OxHSA
mzspec:PXD023738:S4_19_48_45.mzXML:scan:8445:LVNEVTEFAK/2	ARP-Plasma:ARP-OxHSA
mzspec:PXD023738:S4_19_48_44.mzXML:scan:6874:LVNEVTEFAK/2	ARP-Plasma:ARP-OxHSA
mzspec:PXD023738:S4_19_48_44.mzXML:scan:8586:LVNEVTEFAK/2	ARP-Plasma:ARP-OxHSA
mzspec:PXD023738:S4_19_48_42.mzXML:scan:6655:LVNEVTEFAK/2	ARP-Plasma:ARP-OxHSA
mzspec:PXD023738:S4_19_48_42.mzXML:scan:9269:LVNEVTEFAK/2	ARP-Plasma:ARP-OxHSA
mzspec:PXD023738:S4_19_48_45.mzXML:scan:9393:LVNEVTEFAK/2	ARP-Plasma:ARP-OxHSA
mzspec:PXD023738:S4_19_48_43.mzXML:scan:7730:LVNEVTEFAK/2	ARP-Plasma:ARP-OxHSA
mzspec:PXD023738:S4_19_48_40.mzXML:scan:7259:LVNEVTEFAK/2	ARP-Plasma:ARP-OxHSA
mzspec:PXD023738:S4_19_48_43.mzXML:scan:8232:LVNEVTEFAK/2	ARP-Plasma:ARP-OxHSA
mzspec:PXD023738:S4_19_48_44.mzXML:scan:8292:LVNEVTEFAK/2	ARP-Plasma:ARP-OxHSA
mzspec:PXD023738:S4_19_48_45.mzXML:scan:9959:LVNEVTEFAK/2	ARP-Plasma:ARP-OxHSA
mzspec:PXD023738:S4_19_48_40.mzXML:scan:9343:LVNEVTEFAK/2	ARP-Plasma:ARP-OxHSA
mzspec:PXD023738:S4_19_48_44.mzXML:scan:7722:LVNEVTEFAK/2	ARP-Plasma:ARP-OxHSA
mzspec:PXD023738:S4_19_48_43.mzXML:scan:8680:LVNEVTEFAK/2	ARP-Plasma:ARP-OxHSA
mzspec:PXD023738:S4_19_48_44.mzXML:scan:9274:LVNEVTEFAK/2	ARP-Plasma:ARP-OxHSA
mzspec:PXD023738:S4_19_48_45.mzXML:scan:9940:LVNEVTEFAK/2	ARP-Plasma:ARP-OxHSA
mzspec:PXD023738:S4_19_48_41.mzXML:scan:8046:LVNEVTEFAK/2	ARP-Plasma:ARP-OxHSA
mzspec:PXD023738:S4_19_48_44.mzXML:scan:7779:LVNEVTEFAK/2	ARP-Plasma:ARP-OxHSA
mzspec:PXD023738:S4_19_48_45.mzXML:scan:8124:LVNEVTEFAK/2	ARP-Plasma:ARP-OxHSA
mzspec:PXD023738:S4_19_48_43.mzXML:scan:9740:LVNEVTEFAK/2	ARP-Plasma:ARP-OxHSA
mzspec:PXD023738:S4_19_48_44.mzXML:scan:6223:LVNEVTEFAK/2	ARP-Plasma:ARP-OxHSA
mzspec:PXD023738:S4_19_48_41.mzXML:scan:6695:LVNEVTEFAK/2	ARP-Plasma:ARP-OxHSA
mzspec:PXD023738:S4_19_48_44.mzXML:scan:6801:LVNEVTEFAK/2	ARP-Plasma:ARP-OxHSA
mzspec:PXD023738:S4_19_48_43.mzXML:scan:7669:LVNEVTEFAK/2	ARP-Plasma:ARP-OxHSA
mzspec:PXD023738:S4_19_48_43.mzXML:scan:5774:LVNEVTEFAK/2	ARP-Plasma:ARP-OxHSA
mzspec:PXD023738:S4_19_48_44.mzXML:scan:8708:LVNEVTEFAK/2	ARP-Plasma:ARP-OxHSA
mzspec:PXD023738:S4_19_48_43.mzXML:scan:8130:LVNEVTEFAK/2	ARP-Plasma:ARP-OxHSA
mzspec:PXD023738:S4_19_48_41.mzXML:scan:9437:LVNEVTEFAK/2	ARP-Plasma:ARP-OxHSA
mzspec:PXD023738:S4_19_48_45.mzXML:scan:7573:LVNEVTEFAK/2	ARP-Plasma:ARP-OxHSA
mzspec:PXD023738:S4_19_48_41.mzXML:scan:6625:LVNEVTEFAK/2	ARP-Plasma:ARP-OxHSA
mzspec:PXD023738:S4_19_48_44.mzXML:scan:6950:LVNEVTEFAK/2	ARP-Plasma:ARP-OxHSA
mzspec:PXD023738:S4_19_48_45.mzXML:scan:7759:LVNEVTEFAK/2	ARP-Plasma:ARP-OxHSA
mzspec:PXD023738:S4_19_48_44.mzXML:scan:9221:LVNEVTEFAK/2	ARP-Plasma:ARP-OxHSA
mzspec:PXD023738:S4_19_48_44.mzXML:scan:6390:LVNEVTEFAK/2	ARP-Plasma:ARP-OxHSA
mzspec:PXD023738:S4_19_48_44.mzXML:scan:7603:LVNEVTEFAK/2	ARP-Plasma:ARP-OxHSA
mzspec:PXD023738:S4_19_48_43.mzXML:scan:8121:LVNEVTEFAK/2	ARP-Plasma:ARP-OxHSA
mzspec:PXD023738:S4_19_48_44.mzXML:scan:7238:LVNEVTEFAK/2	ARP-Plasma:ARP-OxHSA
mzspec:PXD023738:S4_19_48_44.mzXML:scan:6369:LVNEVTEFAK/2	ARP-Plasma:ARP-OxHSA
mzspec:PXD023738:S4_19_48_45.mzXML:scan:9217:LVNEVTEFAK/2	ARP-Plasma:ARP-OxHSA
mzspec:PXD023738:S4_19_48_45.mzXML:scan:9659:LVNEVTEFAK/2	ARP-Plasma:ARP-OxHSA
mzspec:PXD023738:S4_19_48_45.mzXML:scan:8169:LVNEVTEFAK/2	ARP-Plasma:ARP-OxHSA
mzspec:PXD023738:S4_19_48_43.mzXML:scan:9972:LVNEVTEFAK/2	ARP-Plasma:ARP-OxHSA
mzspec:PXD023738:S4_19_48_43.mzXML:scan:6000:LVNEVTEFAK/2	ARP-Plasma:ARP-OxHSA
mzspec:PXD023738:S4_19_48_41.mzXML:scan:8462:LVNEVTEFAK/2	ARP-Plasma:ARP-OxHSA
mzspec:PXD023738:S4_19_48_44.mzXML:scan:8853:LVNEVTEFAK/2	ARP-Plasma:ARP-OxHSA
[truncated: 10,965 more rows]
